# Supplementary material for: Prediction of Adverse Drug Reaction Linked to Protein Targets Using Network-Based Information and Machine Learning
Source: Front Bioinform. 2022 Jul 14;2:906644. doi: 10.3389/fbinf.2022.906644 (PMC9580901; doi:10.3389/fbinf.2022.906644)
Supplement: Supplementary file 14 [file Table4.XLSX]

## Sheet: Supporting information 3 - Test
adr	uniprot_id	BIANA ID	PT	HLT	HLGT	SOC
Acute_hepatic_failure	Q02413	29971	Acute_hepatic_failure	Hepatic_failure_and_associated_disorders	Hepatic_and_hepatobiliary_disorders	Hepatobiliary_disorders
Acute_hepatic_failure	O95279	64625	Acute_hepatic_failure	Hepatic_failure_and_associated_disorders	Hepatic_and_hepatobiliary_disorders	Hepatobiliary_disorders
Acute_hepatic_failure	O75145	21649	Acute_hepatic_failure	Hepatic_failure_and_associated_disorders	Hepatic_and_hepatobiliary_disorders	Hepatobiliary_disorders
Acute_hepatic_failure	P57086	46367	Acute_hepatic_failure	Hepatic_failure_and_associated_disorders	Hepatic_and_hepatobiliary_disorders	Hepatobiliary_disorders
Acute_hepatic_failure	P55899	63812	Acute_hepatic_failure	Hepatic_failure_and_associated_disorders	Hepatic_and_hepatobiliary_disorders	Hepatobiliary_disorders
Acute_hepatic_failure	O75334	64322	Acute_hepatic_failure	Hepatic_failure_and_associated_disorders	Hepatic_and_hepatobiliary_disorders	Hepatobiliary_disorders
Acute_hepatic_failure	O75335	67139	Acute_hepatic_failure	Hepatic_failure_and_associated_disorders	Hepatic_and_hepatobiliary_disorders	Hepatobiliary_disorders
Acute_hepatic_failure	P41226	46740	Acute_hepatic_failure	Hepatic_failure_and_associated_disorders	Hepatic_and_hepatobiliary_disorders	Hepatobiliary_disorders
Acute_hepatic_failure	Q9NZR2	52392	Acute_hepatic_failure	Hepatic_failure_and_associated_disorders	Hepatic_and_hepatobiliary_disorders	Hepatobiliary_disorders
Acute_hepatic_failure	P02774	31086	Acute_hepatic_failure	Hepatic_failure_and_associated_disorders	Hepatic_and_hepatobiliary_disorders	Hepatobiliary_disorders
Acute_hepatic_failure	P17947	6414	Acute_hepatic_failure	Hepatic_failure_and_associated_disorders	Hepatic_and_hepatobiliary_disorders	Hepatobiliary_disorders
Acute_hepatic_failure	O76014	46943	Acute_hepatic_failure	Hepatic_failure_and_associated_disorders	Hepatic_and_hepatobiliary_disorders	Hepatobiliary_disorders
Acute_hepatic_failure	Q11206	66043	Acute_hepatic_failure	Hepatic_failure_and_associated_disorders	Hepatic_and_hepatobiliary_disorders	Hepatobiliary_disorders
Acute_hepatic_failure	Q8IYS0	65377	Acute_hepatic_failure	Hepatic_failure_and_associated_disorders	Hepatic_and_hepatobiliary_disorders	Hepatobiliary_disorders
Acute_hepatic_failure	Q9UBC1	25315	Acute_hepatic_failure	Hepatic_failure_and_associated_disorders	Hepatic_and_hepatobiliary_disorders	Hepatobiliary_disorders
Acute_hepatic_failure	Q14934	68833	Acute_hepatic_failure	Hepatic_failure_and_associated_disorders	Hepatic_and_hepatobiliary_disorders	Hepatobiliary_disorders
Acute_hepatic_failure	Q12968	65782	Acute_hepatic_failure	Hepatic_failure_and_associated_disorders	Hepatic_and_hepatobiliary_disorders	Hepatobiliary_disorders
Acute_hepatic_failure	P36639	1328	Acute_hepatic_failure	Hepatic_failure_and_associated_disorders	Hepatic_and_hepatobiliary_disorders	Hepatobiliary_disorders
Acute_hepatic_failure	P22894	67202	Acute_hepatic_failure	Hepatic_failure_and_associated_disorders	Hepatic_and_hepatobiliary_disorders	Hepatobiliary_disorders
Acute_hepatic_failure	P03956	64181	Acute_hepatic_failure	Hepatic_failure_and_associated_disorders	Hepatic_and_hepatobiliary_disorders	Hepatobiliary_disorders
Acute_hepatic_failure	O76011	46619	Acute_hepatic_failure	Hepatic_failure_and_associated_disorders	Hepatic_and_hepatobiliary_disorders	Hepatobiliary_disorders
Acute_hepatic_failure	P01308	12914	Acute_hepatic_failure	Hepatic_failure_and_associated_disorders	Hepatic_and_hepatobiliary_disorders	Hepatobiliary_disorders
Acute_hepatic_failure	P18510	67072	Acute_hepatic_failure	Hepatic_failure_and_associated_disorders	Hepatic_and_hepatobiliary_disorders	Hepatobiliary_disorders
Acute_hepatic_failure	P45983	18979	Acute_hepatic_failure	Hepatic_failure_and_associated_disorders	Hepatic_and_hepatobiliary_disorders	Hepatobiliary_disorders
Acute_hepatic_failure	P14061	57409	Acute_hepatic_failure	Hepatic_failure_and_associated_disorders	Hepatic_and_hepatobiliary_disorders	Hepatobiliary_disorders
Acute_hepatic_failure	Q15628	25978	Acute_hepatic_failure	Hepatic_failure_and_associated_disorders	Hepatic_and_hepatobiliary_disorders	Hepatobiliary_disorders
Acute_hepatic_failure	O14763	16056	Acute_hepatic_failure	Hepatic_failure_and_associated_disorders	Hepatic_and_hepatobiliary_disorders	Hepatobiliary_disorders
Acute_hepatic_failure	Q9NZ08	64158	Acute_hepatic_failure	Hepatic_failure_and_associated_disorders	Hepatic_and_hepatobiliary_disorders	Hepatobiliary_disorders
Acute_hepatic_failure	Q9NRF2	64978	Acute_hepatic_failure	Hepatic_failure_and_associated_disorders	Hepatic_and_hepatobiliary_disorders	Hepatobiliary_disorders
Acute_hepatic_failure	Q8NDX1	25600	Acute_hepatic_failure	Hepatic_failure_and_associated_disorders	Hepatic_and_hepatobiliary_disorders	Hepatobiliary_disorders
Acute_hepatic_failure	Q9UPT6	60741	Acute_hepatic_failure	Hepatic_failure_and_associated_disorders	Hepatic_and_hepatobiliary_disorders	Hepatobiliary_disorders
Acute_hepatic_failure	Q9Y446	25977	Acute_hepatic_failure	Hepatic_failure_and_associated_disorders	Hepatic_and_hepatobiliary_disorders	Hepatobiliary_disorders
Acute_hepatic_failure	P19883	51550	Acute_hepatic_failure	Hepatic_failure_and_associated_disorders	Hepatic_and_hepatobiliary_disorders	Hepatobiliary_disorders
Acute_hepatic_failure	Q93038	63213	Acute_hepatic_failure	Hepatic_failure_and_associated_disorders	Hepatic_and_hepatobiliary_disorders	Hepatobiliary_disorders
Acute_hepatic_failure	Q14956	63051	Acute_hepatic_failure	Hepatic_failure_and_associated_disorders	Hepatic_and_hepatobiliary_disorders	Hepatobiliary_disorders
Acute_hepatic_failure	Q16602	33716	Acute_hepatic_failure	Hepatic_failure_and_associated_disorders	Hepatic_and_hepatobiliary_disorders	Hepatobiliary_disorders
Acute_hepatic_failure	Q9UK73	7093	Acute_hepatic_failure	Hepatic_failure_and_associated_disorders	Hepatic_and_hepatobiliary_disorders	Hepatobiliary_disorders
Acute_hepatic_failure	Q13158	51144	Acute_hepatic_failure	Hepatic_failure_and_associated_disorders	Hepatic_and_hepatobiliary_disorders	Hepatobiliary_disorders
Acute_hepatic_failure	Q92837	19504	Acute_hepatic_failure	Hepatic_failure_and_associated_disorders	Hepatic_and_hepatobiliary_disorders	Hepatobiliary_disorders
Acute_hepatic_failure	P19438	10111	Acute_hepatic_failure	Hepatic_failure_and_associated_disorders	Hepatic_and_hepatobiliary_disorders	Hepatobiliary_disorders
Acute_hepatic_failure	P02768	10572	Acute_hepatic_failure	Hepatic_failure_and_associated_disorders	Hepatic_and_hepatobiliary_disorders	Hepatobiliary_disorders
Acute_hepatic_failure	Q9BXH1	24474	Acute_hepatic_failure	Hepatic_failure_and_associated_disorders	Hepatic_and_hepatobiliary_disorders	Hepatobiliary_disorders
Acute_hepatic_failure	P01375	12447	Acute_hepatic_failure	Hepatic_failure_and_associated_disorders	Hepatic_and_hepatobiliary_disorders	Hepatobiliary_disorders
Acute_hepatic_failure	Q9HD36	23539	Acute_hepatic_failure	Hepatic_failure_and_associated_disorders	Hepatic_and_hepatobiliary_disorders	Hepatobiliary_disorders
Acute_hepatic_failure	Q5VV43	64852	Acute_hepatic_failure	Hepatic_failure_and_associated_disorders	Hepatic_and_hepatobiliary_disorders	Hepatobiliary_disorders
Acute_hepatic_failure	Q9UQF2	69986	Acute_hepatic_failure	Hepatic_failure_and_associated_disorders	Hepatic_and_hepatobiliary_disorders	Hepatobiliary_disorders
Acute_hepatic_failure	O60239	760	Acute_hepatic_failure	Hepatic_failure_and_associated_disorders	Hepatic_and_hepatobiliary_disorders	Hepatobiliary_disorders
Acute_hepatic_failure	Q99640	29075	Acute_hepatic_failure	Hepatic_failure_and_associated_disorders	Hepatic_and_hepatobiliary_disorders	Hepatobiliary_disorders
Acute_hepatic_failure	Q01892	7434	Acute_hepatic_failure	Hepatic_failure_and_associated_disorders	Hepatic_and_hepatobiliary_disorders	Hepatobiliary_disorders
Acute_hepatic_failure	O43521	23542	Acute_hepatic_failure	Hepatic_failure_and_associated_disorders	Hepatic_and_hepatobiliary_disorders	Hepatobiliary_disorders
Acute_hepatic_failure	Q02153	20575	Acute_hepatic_failure	Hepatic_failure_and_associated_disorders	Hepatic_and_hepatobiliary_disorders	Hepatobiliary_disorders
Acute_hepatic_failure	Q02108	20580	Acute_hepatic_failure	Hepatic_failure_and_associated_disorders	Hepatic_and_hepatobiliary_disorders	Hepatobiliary_disorders
Acute_hepatic_failure	P01258	33568	Acute_hepatic_failure	Hepatic_failure_and_associated_disorders	Hepatic_and_hepatobiliary_disorders	Hepatobiliary_disorders
Acute_hepatic_failure	Q86XN8	24538	Acute_hepatic_failure	Hepatic_failure_and_associated_disorders	Hepatic_and_hepatobiliary_disorders	Hepatobiliary_disorders
Acute_hepatic_failure	Q13873	28377	Acute_hepatic_failure	Hepatic_failure_and_associated_disorders	Hepatic_and_hepatobiliary_disorders	Hepatobiliary_disorders
Acute_hepatic_failure	P55957	26626	Acute_hepatic_failure	Hepatic_failure_and_associated_disorders	Hepatic_and_hepatobiliary_disorders	Hepatobiliary_disorders
Acute_hepatic_failure	Q4VC05	24988	Acute_hepatic_failure	Hepatic_failure_and_associated_disorders	Hepatic_and_hepatobiliary_disorders	Hepatobiliary_disorders
Acute_hepatic_failure	Q99437	50068	Acute_hepatic_failure	Hepatic_failure_and_associated_disorders	Hepatic_and_hepatobiliary_disorders	Hepatobiliary_disorders
Acute_hepatic_failure	O00244	20878	Acute_hepatic_failure	Hepatic_failure_and_associated_disorders	Hepatic_and_hepatobiliary_disorders	Hepatobiliary_disorders
Acute_hepatic_failure	P01008	12874	Acute_hepatic_failure	Hepatic_failure_and_associated_disorders	Hepatic_and_hepatobiliary_disorders	Hepatobiliary_disorders
Acute_hepatic_failure	P48023	46454	Acute_hepatic_failure	Hepatic_failure_and_associated_disorders	Hepatic_and_hepatobiliary_disorders	Hepatobiliary_disorders
Acute_hepatic_failure	Q9P219	7603	Acute_hepatic_failure	Hepatic_failure_and_associated_disorders	Hepatic_and_hepatobiliary_disorders	Hepatobiliary_disorders
Acute_hepatic_failure	P25445	15686	Acute_hepatic_failure	Hepatic_failure_and_associated_disorders	Hepatic_and_hepatobiliary_disorders	Hepatobiliary_disorders
Acute_hepatic_failure	Q06481	5690	Acute_hepatic_failure	Hepatic_failure_and_associated_disorders	Hepatic_and_hepatobiliary_disorders	Hepatobiliary_disorders
Acute_hepatic_failure	P03950	12234	Acute_hepatic_failure	Hepatic_failure_and_associated_disorders	Hepatic_and_hepatobiliary_disorders	Hepatobiliary_disorders
Acute_hepatic_failure	O60895	60802	Acute_hepatic_failure	Hepatic_failure_and_associated_disorders	Hepatic_and_hepatobiliary_disorders	Hepatobiliary_disorders
Acute_hepatic_failure	Q9NZH6	51525	Acute_hepatic_failure	Hepatic_failure_and_associated_disorders	Hepatic_and_hepatobiliary_disorders	Hepatobiliary_disorders
Acute_hepatic_failure	Q96GW7	45368	Acute_hepatic_failure	Hepatic_failure_and_associated_disorders	Hepatic_and_hepatobiliary_disorders	Hepatobiliary_disorders
Acute_hepatic_failure	P09237	53090	Acute_hepatic_failure	Hepatic_failure_and_associated_disorders	Hepatic_and_hepatobiliary_disorders	Hepatobiliary_disorders
Acute_hepatic_failure	P08254	63985	Acute_hepatic_failure	Hepatic_failure_and_associated_disorders	Hepatic_and_hepatobiliary_disorders	Hepatobiliary_disorders
Acute_hepatic_failure	P05787	12732	Acute_hepatic_failure	Hepatic_failure_and_associated_disorders	Hepatic_and_hepatobiliary_disorders	Hepatobiliary_disorders
Acute_hepatic_failure	P17535	17282	Acute_hepatic_failure	Hepatic_failure_and_associated_disorders	Hepatic_and_hepatobiliary_disorders	Hepatobiliary_disorders
Acute_hepatic_failure	P14210	14300	Acute_hepatic_failure	Hepatic_failure_and_associated_disorders	Hepatic_and_hepatobiliary_disorders	Hepatobiliary_disorders
Acute_hepatic_failure	P35670	21273	Acute_hepatic_failure	Hepatic_failure_and_associated_disorders	Hepatic_and_hepatobiliary_disorders	Hepatobiliary_disorders
Acute_hepatic_failure	P20333	62101	Acute_hepatic_failure	Hepatic_failure_and_associated_disorders	Hepatic_and_hepatobiliary_disorders	Hepatobiliary_disorders
Acute_hepatic_failure	Q12794	30342	Acute_hepatic_failure	Hepatic_failure_and_associated_disorders	Hepatic_and_hepatobiliary_disorders	Hepatobiliary_disorders
Acute_hepatic_failure	P54840	61528	Acute_hepatic_failure	Hepatic_failure_and_associated_disorders	Hepatic_and_hepatobiliary_disorders	Hepatobiliary_disorders
Acute_hepatic_failure	Q8IWZ6	24609	Acute_hepatic_failure	Hepatic_failure_and_associated_disorders	Hepatic_and_hepatobiliary_disorders	Hepatobiliary_disorders
Acute_hepatic_failure	Q96PG8	24474	Acute_hepatic_failure	Hepatic_failure_and_associated_disorders	Hepatic_and_hepatobiliary_disorders	Hepatobiliary_disorders
Acute_hepatic_failure	P49913	33864	Acute_hepatic_failure	Hepatic_failure_and_associated_disorders	Hepatic_and_hepatobiliary_disorders	Hepatobiliary_disorders
Acute_hepatic_failure	P10912	17326	Acute_hepatic_failure	Hepatic_failure_and_associated_disorders	Hepatic_and_hepatobiliary_disorders	Hepatobiliary_disorders
Acute_hepatic_failure	P56159	48455	Acute_hepatic_failure	Hepatic_failure_and_associated_disorders	Hepatic_and_hepatobiliary_disorders	Hepatobiliary_disorders
Acute_hepatic_failure	Q9H310	60823	Acute_hepatic_failure	Hepatic_failure_and_associated_disorders	Hepatic_and_hepatobiliary_disorders	Hepatobiliary_disorders
Acute_hepatic_failure	P55789	11514	Acute_hepatic_failure	Hepatic_failure_and_associated_disorders	Hepatic_and_hepatobiliary_disorders	Hepatobiliary_disorders
Acute_hepatic_failure	P28324	26339	Acute_hepatic_failure	Hepatic_failure_and_associated_disorders	Hepatic_and_hepatobiliary_disorders	Hepatobiliary_disorders
Acute_hepatic_failure	Q9H6I2	32129	Acute_hepatic_failure	Hepatic_failure_and_associated_disorders	Hepatic_and_hepatobiliary_disorders	Hepatobiliary_disorders
Acute_hepatic_failure	Q86UT6	64044	Acute_hepatic_failure	Hepatic_failure_and_associated_disorders	Hepatic_and_hepatobiliary_disorders	Hepatobiliary_disorders
Acute_hepatic_failure	Q13202	60635	Acute_hepatic_failure	Hepatic_failure_and_associated_disorders	Hepatic_and_hepatobiliary_disorders	Hepatobiliary_disorders
Acute_hepatic_failure	P32926	60191	Acute_hepatic_failure	Hepatic_failure_and_associated_disorders	Hepatic_and_hepatobiliary_disorders	Hepatobiliary_disorders
Acute_hepatic_failure	Q09019	27225	Acute_hepatic_failure	Hepatic_failure_and_associated_disorders	Hepatic_and_hepatobiliary_disorders	Hepatobiliary_disorders
Acute_hepatic_failure	P06881	33568	Acute_hepatic_failure	Hepatic_failure_and_associated_disorders	Hepatic_and_hepatobiliary_disorders	Hepatobiliary_disorders
Acute_hepatic_failure	P05783	13475	Acute_hepatic_failure	Hepatic_failure_and_associated_disorders	Hepatic_and_hepatobiliary_disorders	Hepatobiliary_disorders
Acute_hepatic_failure	P20023	48848	Acute_hepatic_failure	Hepatic_failure_and_associated_disorders	Hepatic_and_hepatobiliary_disorders	Hepatobiliary_disorders
Acute_hepatic_failure	P49715	17289	Acute_hepatic_failure	Hepatic_failure_and_associated_disorders	Hepatic_and_hepatobiliary_disorders	Hepatobiliary_disorders
Acute_hepatic_failure	Q8WXG9	62868	Acute_hepatic_failure	Hepatic_failure_and_associated_disorders	Hepatic_and_hepatobiliary_disorders	Hepatobiliary_disorders
Acute_hepatic_failure	P09238	64675	Acute_hepatic_failure	Hepatic_failure_and_associated_disorders	Hepatic_and_hepatobiliary_disorders	Hepatobiliary_disorders
Acute_hepatic_failure	P47902	21254	Acute_hepatic_failure	Hepatic_failure_and_associated_disorders	Hepatic_and_hepatobiliary_disorders	Hepatobiliary_disorders
Acute_hepatic_failure	P48509	39148	Acute_hepatic_failure	Hepatic_failure_and_associated_disorders	Hepatic_and_hepatobiliary_disorders	Hepatobiliary_disorders
Acute_hepatic_failure	P45452	68912	Acute_hepatic_failure	Hepatic_failure_and_associated_disorders	Hepatic_and_hepatobiliary_disorders	Hepatobiliary_disorders
Acute_hepatic_failure	P04233	7328	Acute_hepatic_failure	Hepatic_failure_and_associated_disorders	Hepatic_and_hepatobiliary_disorders	Hepatobiliary_disorders
Acute_hepatic_failure	P31415	35765	Acute_hepatic_failure	Hepatic_failure_and_associated_disorders	Hepatic_and_hepatobiliary_disorders	Hepatobiliary_disorders
Acute_hepatic_failure	Q92851	35739	Acute_hepatic_failure	Hepatic_failure_and_associated_disorders	Hepatic_and_hepatobiliary_disorders	Hepatobiliary_disorders
Acute_hepatic_failure	P20810	21877	Acute_hepatic_failure	Hepatic_failure_and_associated_disorders	Hepatic_and_hepatobiliary_disorders	Hepatobiliary_disorders
Acute_hepatic_failure	P01374	64010	Acute_hepatic_failure	Hepatic_failure_and_associated_disorders	Hepatic_and_hepatobiliary_disorders	Hepatobiliary_disorders
Biliary_cirrhosis	P41597	38951	Biliary_cirrhosis	Hepatic_fibrosis_and_cirrhosis	Hepatic_and_hepatobiliary_disorders	Hepatobiliary_disorders
Biliary_cirrhosis	Q86SQ9	57462	Biliary_cirrhosis	Hepatic_fibrosis_and_cirrhosis	Hepatic_and_hepatobiliary_disorders	Hepatobiliary_disorders
Biliary_cirrhosis	P32302	47964	Biliary_cirrhosis	Hepatic_fibrosis_and_cirrhosis	Hepatic_and_hepatobiliary_disorders	Hepatobiliary_disorders
Biliary_cirrhosis	Q6XR72	28071	Biliary_cirrhosis	Hepatic_fibrosis_and_cirrhosis	Hepatic_and_hepatobiliary_disorders	Hepatobiliary_disorders
Biliary_cirrhosis	P16410	50238	Biliary_cirrhosis	Hepatic_fibrosis_and_cirrhosis	Hepatic_and_hepatobiliary_disorders	Hepatobiliary_disorders
Biliary_cirrhosis	P51679	38990	Biliary_cirrhosis	Hepatic_fibrosis_and_cirrhosis	Hepatic_and_hepatobiliary_disorders	Hepatobiliary_disorders
Biliary_cirrhosis	P11686	46337	Biliary_cirrhosis	Hepatic_fibrosis_and_cirrhosis	Hepatic_and_hepatobiliary_disorders	Hepatobiliary_disorders
Biliary_cirrhosis	P04920	16375	Biliary_cirrhosis	Hepatic_fibrosis_and_cirrhosis	Hepatic_and_hepatobiliary_disorders	Hepatobiliary_disorders
Biliary_cirrhosis	Q99616	38208	Biliary_cirrhosis	Hepatic_fibrosis_and_cirrhosis	Hepatic_and_hepatobiliary_disorders	Hepatobiliary_disorders
Biliary_cirrhosis	Q14916	63915	Biliary_cirrhosis	Hepatic_fibrosis_and_cirrhosis	Hepatic_and_hepatobiliary_disorders	Hepatobiliary_disorders
Biliary_cirrhosis	P27487	21367	Biliary_cirrhosis	Hepatic_fibrosis_and_cirrhosis	Hepatic_and_hepatobiliary_disorders	Hepatobiliary_disorders
Biliary_cirrhosis	P48061	69705	Biliary_cirrhosis	Hepatic_fibrosis_and_cirrhosis	Hepatic_and_hepatobiliary_disorders	Hepatobiliary_disorders
Biliary_cirrhosis	Q01892	7434	Biliary_cirrhosis	Hepatic_fibrosis_and_cirrhosis	Hepatic_and_hepatobiliary_disorders	Hepatobiliary_disorders
Biliary_cirrhosis	P19875	51223	Biliary_cirrhosis	Hepatic_fibrosis_and_cirrhosis	Hepatic_and_hepatobiliary_disorders	Hepatobiliary_disorders
Biliary_cirrhosis	P01374	64010	Biliary_cirrhosis	Hepatic_fibrosis_and_cirrhosis	Hepatic_and_hepatobiliary_disorders	Hepatobiliary_disorders
Biliary_cirrhosis	Q14765	7627	Biliary_cirrhosis	Hepatic_fibrosis_and_cirrhosis	Hepatic_and_hepatobiliary_disorders	Hepatobiliary_disorders
Biliary_cirrhosis	Q9Y4K0	58462	Biliary_cirrhosis	Hepatic_fibrosis_and_cirrhosis	Hepatic_and_hepatobiliary_disorders	Hepatobiliary_disorders
Biliary_cirrhosis	P28300	16400	Biliary_cirrhosis	Hepatic_fibrosis_and_cirrhosis	Hepatic_and_hepatobiliary_disorders	Hepatobiliary_disorders
Biliary_cirrhosis	Q15569	14378	Biliary_cirrhosis	Hepatic_fibrosis_and_cirrhosis	Hepatic_and_hepatobiliary_disorders	Hepatobiliary_disorders
Biliary_cirrhosis	P08729	20790	Biliary_cirrhosis	Hepatic_fibrosis_and_cirrhosis	Hepatic_and_hepatobiliary_disorders	Hepatobiliary_disorders
Biliary_cirrhosis	P49682	29431	Biliary_cirrhosis	Hepatic_fibrosis_and_cirrhosis	Hepatic_and_hepatobiliary_disorders	Hepatobiliary_disorders
Biliary_cirrhosis	Q07325	26830	Biliary_cirrhosis	Hepatic_fibrosis_and_cirrhosis	Hepatic_and_hepatobiliary_disorders	Hepatobiliary_disorders
Biliary_cirrhosis	O14625	51352	Biliary_cirrhosis	Hepatic_fibrosis_and_cirrhosis	Hepatic_and_hepatobiliary_disorders	Hepatobiliary_disorders
Biliary_cirrhosis	P19838	6119	Biliary_cirrhosis	Hepatic_fibrosis_and_cirrhosis	Hepatic_and_hepatobiliary_disorders	Hepatobiliary_disorders
Biliary_cirrhosis	P80075	38327	Biliary_cirrhosis	Hepatic_fibrosis_and_cirrhosis	Hepatic_and_hepatobiliary_disorders	Hepatobiliary_disorders
Biliary_cirrhosis	O15467	38213	Biliary_cirrhosis	Hepatic_fibrosis_and_cirrhosis	Hepatic_and_hepatobiliary_disorders	Hepatobiliary_disorders
Biliary_cirrhosis	P80098	35691	Biliary_cirrhosis	Hepatic_fibrosis_and_cirrhosis	Hepatic_and_hepatobiliary_disorders	Hepatobiliary_disorders
Biliary_cirrhosis	P13501	21023	Biliary_cirrhosis	Hepatic_fibrosis_and_cirrhosis	Hepatic_and_hepatobiliary_disorders	Hepatobiliary_disorders
Biliary_cirrhosis	P13236	37526	Biliary_cirrhosis	Hepatic_fibrosis_and_cirrhosis	Hepatic_and_hepatobiliary_disorders	Hepatobiliary_disorders
Biliary_cirrhosis	Q92583	38218	Biliary_cirrhosis	Hepatic_fibrosis_and_cirrhosis	Hepatic_and_hepatobiliary_disorders	Hepatobiliary_disorders
Biliary_cirrhosis	Q16665	12918	Biliary_cirrhosis	Hepatic_fibrosis_and_cirrhosis	Hepatic_and_hepatobiliary_disorders	Hepatobiliary_disorders
Biliary_cirrhosis	P13500	38273	Biliary_cirrhosis	Hepatic_fibrosis_and_cirrhosis	Hepatic_and_hepatobiliary_disorders	Hepatobiliary_disorders
Biliary_cirrhosis	Q99731	38222	Biliary_cirrhosis	Hepatic_fibrosis_and_cirrhosis	Hepatic_and_hepatobiliary_disorders	Hepatobiliary_disorders
Biliary_cirrhosis	O00626	38241	Biliary_cirrhosis	Hepatic_fibrosis_and_cirrhosis	Hepatic_and_hepatobiliary_disorders	Hepatobiliary_disorders
Biliary_cirrhosis	P22362	38226	Biliary_cirrhosis	Hepatic_fibrosis_and_cirrhosis	Hepatic_and_hepatobiliary_disorders	Hepatobiliary_disorders
Biliary_cirrhosis	P21439	68100	Biliary_cirrhosis	Hepatic_fibrosis_and_cirrhosis	Hepatic_and_hepatobiliary_disorders	Hepatobiliary_disorders
Biliary_cirrhosis	P51681	21022	Biliary_cirrhosis	Hepatic_fibrosis_and_cirrhosis	Hepatic_and_hepatobiliary_disorders	Hepatobiliary_disorders
Biliary_cirrhosis	Q15116	32797	Biliary_cirrhosis	Hepatic_fibrosis_and_cirrhosis	Hepatic_and_hepatobiliary_disorders	Hepatobiliary_disorders
Biliary_cirrhosis	O15444	38253	Biliary_cirrhosis	Hepatic_fibrosis_and_cirrhosis	Hepatic_and_hepatobiliary_disorders	Hepatobiliary_disorders
Biliary_cirrhosis	P51685	39008	Biliary_cirrhosis	Hepatic_fibrosis_and_cirrhosis	Hepatic_and_hepatobiliary_disorders	Hepatobiliary_disorders
Biliary_cirrhosis	Q92887	66105	Biliary_cirrhosis	Hepatic_fibrosis_and_cirrhosis	Hepatic_and_hepatobiliary_disorders	Hepatobiliary_disorders
Biliary_cirrhosis	P01375	12447	Biliary_cirrhosis	Hepatic_fibrosis_and_cirrhosis	Hepatic_and_hepatobiliary_disorders	Hepatobiliary_disorders
Biliary_cirrhosis	P02778	51343	Biliary_cirrhosis	Hepatic_fibrosis_and_cirrhosis	Hepatic_and_hepatobiliary_disorders	Hepatobiliary_disorders
Biliary_cirrhosis	P51671	38199	Biliary_cirrhosis	Hepatic_fibrosis_and_cirrhosis	Hepatic_and_hepatobiliary_disorders	Hepatobiliary_disorders
Biliary_cirrhosis	Q92636	30011	Biliary_cirrhosis	Hepatic_fibrosis_and_cirrhosis	Hepatic_and_hepatobiliary_disorders	Hepatobiliary_disorders
Biliary_cirrhosis	P33151	32830	Biliary_cirrhosis	Hepatic_fibrosis_and_cirrhosis	Hepatic_and_hepatobiliary_disorders	Hepatobiliary_disorders
Biliary_cirrhosis	Q9Y5L3	65064	Biliary_cirrhosis	Hepatic_fibrosis_and_cirrhosis	Hepatic_and_hepatobiliary_disorders	Hepatobiliary_disorders
Biliary_cirrhosis	Q93038	63213	Biliary_cirrhosis	Hepatic_fibrosis_and_cirrhosis	Hepatic_and_hepatobiliary_disorders	Hepatobiliary_disorders
Biliary_cirrhosis	P32246	6165	Biliary_cirrhosis	Hepatic_fibrosis_and_cirrhosis	Hepatic_and_hepatobiliary_disorders	Hepatobiliary_disorders
Biliary_cirrhosis	Q06710	46356	Biliary_cirrhosis	Hepatic_fibrosis_and_cirrhosis	Hepatic_and_hepatobiliary_disorders	Hepatobiliary_disorders
Biliary_cirrhosis	Q9UNQ0	3164	Biliary_cirrhosis	Hepatic_fibrosis_and_cirrhosis	Hepatic_and_hepatobiliary_disorders	Hepatobiliary_disorders
Biliary_cirrhosis	P33681	39370	Biliary_cirrhosis	Hepatic_fibrosis_and_cirrhosis	Hepatic_and_hepatobiliary_disorders	Hepatobiliary_disorders
Biliary_cirrhosis	O95478	22902	Biliary_cirrhosis	Hepatic_fibrosis_and_cirrhosis	Hepatic_and_hepatobiliary_disorders	Hepatobiliary_disorders
Biliary_cirrhosis	P32942	68779	Biliary_cirrhosis	Hepatic_fibrosis_and_cirrhosis	Hepatic_and_hepatobiliary_disorders	Hepatobiliary_disorders
Biliary_cirrhosis	P13232	62747	Biliary_cirrhosis	Hepatic_fibrosis_and_cirrhosis	Hepatic_and_hepatobiliary_disorders	Hepatobiliary_disorders
Biliary_cirrhosis	Q96DZ5	43327	Biliary_cirrhosis	Hepatic_fibrosis_and_cirrhosis	Hepatic_and_hepatobiliary_disorders	Hepatobiliary_disorders
Biliary_cirrhosis	P54840	61528	Biliary_cirrhosis	Hepatic_fibrosis_and_cirrhosis	Hepatic_and_hepatobiliary_disorders	Hepatobiliary_disorders
Biliary_cirrhosis	P16871	64709	Biliary_cirrhosis	Hepatic_fibrosis_and_cirrhosis	Hepatic_and_hepatobiliary_disorders	Hepatobiliary_disorders
Biliary_cirrhosis	P50607	68725	Biliary_cirrhosis	Hepatic_fibrosis_and_cirrhosis	Hepatic_and_hepatobiliary_disorders	Hepatobiliary_disorders
Biliary_cirrhosis	P19438	10111	Biliary_cirrhosis	Hepatic_fibrosis_and_cirrhosis	Hepatic_and_hepatobiliary_disorders	Hepatobiliary_disorders
Biliary_cirrhosis	P29597	14642	Biliary_cirrhosis	Hepatic_fibrosis_and_cirrhosis	Hepatic_and_hepatobiliary_disorders	Hepatobiliary_disorders
Biliary_cirrhosis	P10747	39218	Biliary_cirrhosis	Hepatic_fibrosis_and_cirrhosis	Hepatic_and_hepatobiliary_disorders	Hepatobiliary_disorders
Biliary_cirrhosis	P42701	68473	Biliary_cirrhosis	Hepatic_fibrosis_and_cirrhosis	Hepatic_and_hepatobiliary_disorders	Hepatobiliary_disorders
Biliary_cirrhosis	P04234	39258	Biliary_cirrhosis	Hepatic_fibrosis_and_cirrhosis	Hepatic_and_hepatobiliary_disorders	Hepatobiliary_disorders
Biliary_cirrhosis	Q9BXS9	63895	Biliary_cirrhosis	Hepatic_fibrosis_and_cirrhosis	Hepatic_and_hepatobiliary_disorders	Hepatobiliary_disorders
Biliary_cirrhosis	P51677	38963	Biliary_cirrhosis	Hepatic_fibrosis_and_cirrhosis	Hepatic_and_hepatobiliary_disorders	Hepatobiliary_disorders
Biliary_cirrhosis	Q9NPB9	5127	Biliary_cirrhosis	Hepatic_fibrosis_and_cirrhosis	Hepatic_and_hepatobiliary_disorders	Hepatobiliary_disorders
Biliary_cirrhosis	Q99665	61153	Biliary_cirrhosis	Hepatic_fibrosis_and_cirrhosis	Hepatic_and_hepatobiliary_disorders	Hepatobiliary_disorders
Biliary_cirrhosis	P29459	64074	Biliary_cirrhosis	Hepatic_fibrosis_and_cirrhosis	Hepatic_and_hepatobiliary_disorders	Hepatobiliary_disorders
Biliary_cirrhosis	Q9NZ08	64158	Biliary_cirrhosis	Hepatic_fibrosis_and_cirrhosis	Hepatic_and_hepatobiliary_disorders	Hepatobiliary_disorders
Cirrhosis_alcoholic	P01033	35634	Cirrhosis_alcoholic	Hepatic_fibrosis_and_cirrhosis	Hepatic_and_hepatobiliary_disorders	Hepatobiliary_disorders
Cirrhosis_alcoholic	Q04206	14384	Cirrhosis_alcoholic	Hepatic_fibrosis_and_cirrhosis	Hepatic_and_hepatobiliary_disorders	Hepatobiliary_disorders
Cirrhosis_alcoholic	P10415	14677	Cirrhosis_alcoholic	Hepatic_fibrosis_and_cirrhosis	Hepatic_and_hepatobiliary_disorders	Hepatobiliary_disorders
Cirrhosis_alcoholic	P05231	17383	Cirrhosis_alcoholic	Hepatic_fibrosis_and_cirrhosis	Hepatic_and_hepatobiliary_disorders	Hepatobiliary_disorders
Cirrhosis_alcoholic	P35442	67276	Cirrhosis_alcoholic	Hepatic_fibrosis_and_cirrhosis	Hepatic_and_hepatobiliary_disorders	Hepatobiliary_disorders
Cirrhosis_alcoholic	P16035	27355	Cirrhosis_alcoholic	Hepatic_fibrosis_and_cirrhosis	Hepatic_and_hepatobiliary_disorders	Hepatobiliary_disorders
Cirrhosis_alcoholic	P04179	5076	Cirrhosis_alcoholic	Hepatic_fibrosis_and_cirrhosis	Hepatic_and_hepatobiliary_disorders	Hepatobiliary_disorders
Cirrhosis_alcoholic	Q12794	30342	Cirrhosis_alcoholic	Hepatic_fibrosis_and_cirrhosis	Hepatic_and_hepatobiliary_disorders	Hepatobiliary_disorders
Cirrhosis_alcoholic	Q96N66	15983	Cirrhosis_alcoholic	Hepatic_fibrosis_and_cirrhosis	Hepatic_and_hepatobiliary_disorders	Hepatobiliary_disorders
Cirrhosis_alcoholic	P05181	48284	Cirrhosis_alcoholic	Hepatic_fibrosis_and_cirrhosis	Hepatic_and_hepatobiliary_disorders	Hepatobiliary_disorders
Cirrhosis_alcoholic	Q9NST1	63146	Cirrhosis_alcoholic	Hepatic_fibrosis_and_cirrhosis	Hepatic_and_hepatobiliary_disorders	Hepatobiliary_disorders
Cirrhosis_alcoholic	P08887	17382	Cirrhosis_alcoholic	Hepatic_fibrosis_and_cirrhosis	Hepatic_and_hepatobiliary_disorders	Hepatobiliary_disorders
Cirrhosis_alcoholic	P02458	45791	Cirrhosis_alcoholic	Hepatic_fibrosis_and_cirrhosis	Hepatic_and_hepatobiliary_disorders	Hepatobiliary_disorders
Cirrhosis_alcoholic	P01375	12447	Cirrhosis_alcoholic	Hepatic_fibrosis_and_cirrhosis	Hepatic_and_hepatobiliary_disorders	Hepatobiliary_disorders
Cirrhosis_alcoholic	P45452	68912	Cirrhosis_alcoholic	Hepatic_fibrosis_and_cirrhosis	Hepatic_and_hepatobiliary_disorders	Hepatobiliary_disorders
Cirrhosis_alcoholic	P02461	6730	Cirrhosis_alcoholic	Hepatic_fibrosis_and_cirrhosis	Hepatic_and_hepatobiliary_disorders	Hepatobiliary_disorders
Cirrhosis_alcoholic	P14780	12999	Cirrhosis_alcoholic	Hepatic_fibrosis_and_cirrhosis	Hepatic_and_hepatobiliary_disorders	Hepatobiliary_disorders
Cirrhosis_alcoholic	P09238	64675	Cirrhosis_alcoholic	Hepatic_fibrosis_and_cirrhosis	Hepatic_and_hepatobiliary_disorders	Hepatobiliary_disorders
Cirrhosis_alcoholic	P08253	19136	Cirrhosis_alcoholic	Hepatic_fibrosis_and_cirrhosis	Hepatic_and_hepatobiliary_disorders	Hepatobiliary_disorders
Cirrhosis_alcoholic	P13725	64645	Cirrhosis_alcoholic	Hepatic_fibrosis_and_cirrhosis	Hepatic_and_hepatobiliary_disorders	Hepatobiliary_disorders
Cirrhosis_alcoholic	P04040	6316	Cirrhosis_alcoholic	Hepatic_fibrosis_and_cirrhosis	Hepatic_and_hepatobiliary_disorders	Hepatobiliary_disorders
Cirrhosis_alcoholic	P84022	13465	Cirrhosis_alcoholic	Hepatic_fibrosis_and_cirrhosis	Hepatic_and_hepatobiliary_disorders	Hepatobiliary_disorders
Cirrhosis_alcoholic	P80162	51236	Cirrhosis_alcoholic	Hepatic_fibrosis_and_cirrhosis	Hepatic_and_hepatobiliary_disorders	Hepatobiliary_disorders
Cirrhosis_alcoholic	Q96GW7	45368	Cirrhosis_alcoholic	Hepatic_fibrosis_and_cirrhosis	Hepatic_and_hepatobiliary_disorders	Hepatobiliary_disorders
Cirrhosis_alcoholic	P01137	5665	Cirrhosis_alcoholic	Hepatic_fibrosis_and_cirrhosis	Hepatic_and_hepatobiliary_disorders	Hepatobiliary_disorders
Drug-induced_liver_injury	P02787	35640	Drug-induced_liver_injury	Hepatocellular_damage_and_hepatitis_NEC	Hepatic_and_hepatobiliary_disorders	Hepatobiliary_disorders
Drug-induced_liver_injury	P63098	21364	Drug-induced_liver_injury	Hepatocellular_damage_and_hepatitis_NEC	Hepatic_and_hepatobiliary_disorders	Hepatobiliary_disorders
Drug-induced_liver_injury	P21731	15953	Drug-induced_liver_injury	Hepatocellular_damage_and_hepatitis_NEC	Hepatic_and_hepatobiliary_disorders	Hepatobiliary_disorders
Drug-induced_liver_injury	P78527	12762	Drug-induced_liver_injury	Hepatocellular_damage_and_hepatitis_NEC	Hepatic_and_hepatobiliary_disorders	Hepatobiliary_disorders
Drug-induced_liver_injury	Q15648	28605	Drug-induced_liver_injury	Hepatocellular_damage_and_hepatitis_NEC	Hepatic_and_hepatobiliary_disorders	Hepatobiliary_disorders
Drug-induced_liver_injury	P55058	68079	Drug-induced_liver_injury	Hepatocellular_damage_and_hepatitis_NEC	Hepatic_and_hepatobiliary_disorders	Hepatobiliary_disorders
Drug-induced_liver_injury	O00204	62418	Drug-induced_liver_injury	Hepatocellular_damage_and_hepatitis_NEC	Hepatic_and_hepatobiliary_disorders	Hepatobiliary_disorders
Drug-induced_liver_injury	P49888	35629	Drug-induced_liver_injury	Hepatocellular_damage_and_hepatitis_NEC	Hepatic_and_hepatobiliary_disorders	Hepatobiliary_disorders
Drug-induced_liver_injury	P08183	69937	Drug-induced_liver_injury	Hepatocellular_damage_and_hepatitis_NEC	Hepatic_and_hepatobiliary_disorders	Hepatobiliary_disorders
Drug-induced_liver_injury	P11801	13766	Drug-induced_liver_injury	Hepatocellular_damage_and_hepatitis_NEC	Hepatic_and_hepatobiliary_disorders	Hepatobiliary_disorders
Drug-induced_liver_injury	O76094	19589	Drug-induced_liver_injury	Hepatocellular_damage_and_hepatitis_NEC	Hepatic_and_hepatobiliary_disorders	Hepatobiliary_disorders
Drug-induced_liver_injury	P37837	66175	Drug-induced_liver_injury	Hepatocellular_damage_and_hepatitis_NEC	Hepatic_and_hepatobiliary_disorders	Hepatobiliary_disorders
Drug-induced_liver_injury	P51685	39008	Drug-induced_liver_injury	Hepatocellular_damage_and_hepatitis_NEC	Hepatic_and_hepatobiliary_disorders	Hepatobiliary_disorders
Drug-induced_liver_injury	P00750	61668	Drug-induced_liver_injury	Hepatocellular_damage_and_hepatitis_NEC	Hepatic_and_hepatobiliary_disorders	Hepatobiliary_disorders
Drug-induced_liver_injury	P81133	15618	Drug-induced_liver_injury	Hepatocellular_damage_and_hepatitis_NEC	Hepatic_and_hepatobiliary_disorders	Hepatobiliary_disorders
Drug-induced_liver_injury	P80162	51236	Drug-induced_liver_injury	Hepatocellular_damage_and_hepatitis_NEC	Hepatic_and_hepatobiliary_disorders	Hepatobiliary_disorders
Drug-induced_liver_injury	Q92887	66105	Drug-induced_liver_injury	Hepatocellular_damage_and_hepatitis_NEC	Hepatic_and_hepatobiliary_disorders	Hepatobiliary_disorders
Drug-induced_liver_injury	P78556	38234	Drug-induced_liver_injury	Hepatocellular_damage_and_hepatitis_NEC	Hepatic_and_hepatobiliary_disorders	Hepatobiliary_disorders
Drug-induced_liver_injury	Q14190	14480	Drug-induced_liver_injury	Hepatocellular_damage_and_hepatitis_NEC	Hepatic_and_hepatobiliary_disorders	Hepatobiliary_disorders
Drug-induced_liver_injury	P03973	47846	Drug-induced_liver_injury	Hepatocellular_damage_and_hepatitis_NEC	Hepatic_and_hepatobiliary_disorders	Hepatobiliary_disorders
Drug-induced_liver_injury	P31949	7517	Drug-induced_liver_injury	Hepatocellular_damage_and_hepatitis_NEC	Hepatic_and_hepatobiliary_disorders	Hepatobiliary_disorders
Drug-induced_liver_injury	P04179	5076	Drug-induced_liver_injury	Hepatocellular_damage_and_hepatitis_NEC	Hepatic_and_hepatobiliary_disorders	Hepatobiliary_disorders
Drug-induced_liver_injury	P09455	66821	Drug-induced_liver_injury	Hepatocellular_damage_and_hepatitis_NEC	Hepatic_and_hepatobiliary_disorders	Hepatobiliary_disorders
Drug-induced_liver_injury	Q99574	52702	Drug-induced_liver_injury	Hepatocellular_damage_and_hepatitis_NEC	Hepatic_and_hepatobiliary_disorders	Hepatobiliary_disorders
Drug-induced_liver_injury	P35354	45460	Drug-induced_liver_injury	Hepatocellular_damage_and_hepatitis_NEC	Hepatic_and_hepatobiliary_disorders	Hepatobiliary_disorders
Drug-induced_liver_injury	P08294	5077	Drug-induced_liver_injury	Hepatocellular_damage_and_hepatitis_NEC	Hepatic_and_hepatobiliary_disorders	Hepatobiliary_disorders
Drug-induced_liver_injury	Q00796	27633	Drug-induced_liver_injury	Hepatocellular_damage_and_hepatitis_NEC	Hepatic_and_hepatobiliary_disorders	Hepatobiliary_disorders
Drug-induced_liver_injury	P10082	68038	Drug-induced_liver_injury	Hepatocellular_damage_and_hepatitis_NEC	Hepatic_and_hepatobiliary_disorders	Hepatobiliary_disorders
Drug-induced_liver_injury	Q8WVN6	62013	Drug-induced_liver_injury	Hepatocellular_damage_and_hepatitis_NEC	Hepatic_and_hepatobiliary_disorders	Hepatobiliary_disorders
Drug-induced_liver_injury	P10451	63379	Drug-induced_liver_injury	Hepatocellular_damage_and_hepatitis_NEC	Hepatic_and_hepatobiliary_disorders	Hepatobiliary_disorders
Drug-induced_liver_injury	Q92673	7234	Drug-induced_liver_injury	Hepatocellular_damage_and_hepatitis_NEC	Hepatic_and_hepatobiliary_disorders	Hepatobiliary_disorders
Drug-induced_liver_injury	O75469	14103	Drug-induced_liver_injury	Hepatocellular_damage_and_hepatitis_NEC	Hepatic_and_hepatobiliary_disorders	Hepatobiliary_disorders
Drug-induced_liver_injury	P36897	13028	Drug-induced_liver_injury	Hepatocellular_damage_and_hepatitis_NEC	Hepatic_and_hepatobiliary_disorders	Hepatobiliary_disorders
Drug-induced_liver_injury	Q9NRA1	61773	Drug-induced_liver_injury	Hepatocellular_damage_and_hepatitis_NEC	Hepatic_and_hepatobiliary_disorders	Hepatobiliary_disorders
Drug-induced_liver_injury	Q9NTX5	6437	Drug-induced_liver_injury	Hepatocellular_damage_and_hepatitis_NEC	Hepatic_and_hepatobiliary_disorders	Hepatobiliary_disorders
Drug-induced_liver_injury	Q9NUJ1	3479	Drug-induced_liver_injury	Hepatocellular_damage_and_hepatitis_NEC	Hepatic_and_hepatobiliary_disorders	Hepatobiliary_disorders
Drug-induced_liver_injury	Q9NVV0	15959	Drug-induced_liver_injury	Hepatocellular_damage_and_hepatitis_NEC	Hepatic_and_hepatobiliary_disorders	Hepatobiliary_disorders
Drug-induced_liver_injury	Q9NX78	67577	Drug-induced_liver_injury	Hepatocellular_damage_and_hepatitis_NEC	Hepatic_and_hepatobiliary_disorders	Hepatobiliary_disorders
Drug-induced_liver_injury	Q9Y394	7777	Drug-induced_liver_injury	Hepatocellular_damage_and_hepatitis_NEC	Hepatic_and_hepatobiliary_disorders	Hepatobiliary_disorders
Drug-induced_liver_injury	Q9UKB3	52337	Drug-induced_liver_injury	Hepatocellular_damage_and_hepatitis_NEC	Hepatic_and_hepatobiliary_disorders	Hepatobiliary_disorders
Drug-induced_liver_injury	Q9Y5K8	19696	Drug-induced_liver_injury	Hepatocellular_damage_and_hepatitis_NEC	Hepatic_and_hepatobiliary_disorders	Hepatobiliary_disorders
Drug-induced_liver_injury	Q9Y3B3	21104	Drug-induced_liver_injury	Hepatocellular_damage_and_hepatitis_NEC	Hepatic_and_hepatobiliary_disorders	Hepatobiliary_disorders
Drug-induced_liver_injury	Q9NPH5	69540	Drug-induced_liver_injury	Hepatocellular_damage_and_hepatitis_NEC	Hepatic_and_hepatobiliary_disorders	Hepatobiliary_disorders
Drug-induced_liver_injury	Q9NZI2	67494	Drug-induced_liver_injury	Hepatocellular_damage_and_hepatitis_NEC	Hepatic_and_hepatobiliary_disorders	Hepatobiliary_disorders
Drug-induced_liver_injury	Q9NS61	24014	Drug-induced_liver_injury	Hepatocellular_damage_and_hepatitis_NEC	Hepatic_and_hepatobiliary_disorders	Hepatobiliary_disorders
Drug-induced_liver_injury	O43704	64556	Drug-induced_liver_injury	Hepatocellular_damage_and_hepatitis_NEC	Hepatic_and_hepatobiliary_disorders	Hepatobiliary_disorders
Drug-induced_liver_injury	Q9NZH6	51525	Drug-induced_liver_injury	Hepatocellular_damage_and_hepatitis_NEC	Hepatic_and_hepatobiliary_disorders	Hepatobiliary_disorders
Drug-induced_liver_injury	Q9NZP8	30941	Drug-induced_liver_injury	Hepatocellular_damage_and_hepatitis_NEC	Hepatic_and_hepatobiliary_disorders	Hepatobiliary_disorders
Drug-induced_liver_injury	Q9BQI3	14334	Drug-induced_liver_injury	Hepatocellular_damage_and_hepatitis_NEC	Hepatic_and_hepatobiliary_disorders	Hepatobiliary_disorders
Drug-induced_liver_injury	Q9BUT1	25189	Drug-induced_liver_injury	Hepatocellular_damage_and_hepatitis_NEC	Hepatic_and_hepatobiliary_disorders	Hepatobiliary_disorders
Drug-induced_liver_injury	Q96GW7	45368	Drug-induced_liver_injury	Hepatocellular_damage_and_hepatitis_NEC	Hepatic_and_hepatobiliary_disorders	Hepatobiliary_disorders
Drug-induced_liver_injury	P32302	47964	Drug-induced_liver_injury	Hepatocellular_damage_and_hepatitis_NEC	Hepatic_and_hepatobiliary_disorders	Hepatobiliary_disorders
Drug-induced_liver_injury	P32246	6165	Drug-induced_liver_injury	Hepatocellular_damage_and_hepatitis_NEC	Hepatic_and_hepatobiliary_disorders	Hepatobiliary_disorders
Drug-induced_liver_injury	Q96ES7	24942	Drug-induced_liver_injury	Hepatocellular_damage_and_hepatitis_NEC	Hepatic_and_hepatobiliary_disorders	Hepatobiliary_disorders
Drug-induced_liver_injury	Q86UW7	19272	Drug-induced_liver_injury	Hepatocellular_damage_and_hepatitis_NEC	Hepatic_and_hepatobiliary_disorders	Hepatobiliary_disorders
Drug-induced_liver_injury	Q9BRT6	47559	Drug-induced_liver_injury	Hepatocellular_damage_and_hepatitis_NEC	Hepatic_and_hepatobiliary_disorders	Hepatobiliary_disorders
Drug-induced_liver_injury	Q9GZQ8	5653	Drug-induced_liver_injury	Hepatocellular_damage_and_hepatitis_NEC	Hepatic_and_hepatobiliary_disorders	Hepatobiliary_disorders
Drug-induced_liver_injury	O95925	35211	Drug-induced_liver_injury	Hepatocellular_damage_and_hepatitis_NEC	Hepatic_and_hepatobiliary_disorders	Hepatobiliary_disorders
Drug-induced_liver_injury	Q9H1C4	16293	Drug-induced_liver_injury	Hepatocellular_damage_and_hepatitis_NEC	Hepatic_and_hepatobiliary_disorders	Hepatobiliary_disorders
Drug-induced_liver_injury	Q2MV58	69814	Drug-induced_liver_injury	Hepatocellular_damage_and_hepatitis_NEC	Hepatic_and_hepatobiliary_disorders	Hepatobiliary_disorders
Drug-induced_liver_injury	Q8NBP0	16084	Drug-induced_liver_injury	Hepatocellular_damage_and_hepatitis_NEC	Hepatic_and_hepatobiliary_disorders	Hepatobiliary_disorders
Drug-induced_liver_injury	Q9HCS2	46135	Drug-induced_liver_injury	Hepatocellular_damage_and_hepatitis_NEC	Hepatic_and_hepatobiliary_disorders	Hepatobiliary_disorders
Drug-induced_liver_injury	Q9H1J1	6224	Drug-induced_liver_injury	Hepatocellular_damage_and_hepatitis_NEC	Hepatic_and_hepatobiliary_disorders	Hepatobiliary_disorders
Drug-induced_liver_injury	Q9H0V1	27066	Drug-induced_liver_injury	Hepatocellular_damage_and_hepatitis_NEC	Hepatic_and_hepatobiliary_disorders	Hepatobiliary_disorders
Drug-induced_liver_injury	Q6P179	67130	Drug-induced_liver_injury	Hepatocellular_damage_and_hepatitis_NEC	Hepatic_and_hepatobiliary_disorders	Hepatobiliary_disorders
Drug-induced_liver_injury	Q9GZZ9	31253	Drug-induced_liver_injury	Hepatocellular_damage_and_hepatitis_NEC	Hepatic_and_hepatobiliary_disorders	Hepatobiliary_disorders
Drug-induced_liver_injury	Q9UBN1	38105	Drug-induced_liver_injury	Hepatocellular_damage_and_hepatitis_NEC	Hepatic_and_hepatobiliary_disorders	Hepatobiliary_disorders
Drug-induced_liver_injury	Q96D42	64838	Drug-induced_liver_injury	Hepatocellular_damage_and_hepatitis_NEC	Hepatic_and_hepatobiliary_disorders	Hepatobiliary_disorders
Drug-induced_liver_injury	Q96F46	64120	Drug-induced_liver_injury	Hepatocellular_damage_and_hepatitis_NEC	Hepatic_and_hepatobiliary_disorders	Hepatobiliary_disorders
Drug-induced_liver_injury	Q92820	65419	Drug-induced_liver_injury	Hepatocellular_damage_and_hepatitis_NEC	Hepatic_and_hepatobiliary_disorders	Hepatobiliary_disorders
Drug-induced_liver_injury	Q13478	60774	Drug-induced_liver_injury	Hepatocellular_damage_and_hepatitis_NEC	Hepatic_and_hepatobiliary_disorders	Hepatobiliary_disorders
Drug-induced_liver_injury	O95256	62342	Drug-induced_liver_injury	Hepatocellular_damage_and_hepatitis_NEC	Hepatic_and_hepatobiliary_disorders	Hepatobiliary_disorders
Drug-induced_liver_injury	O75192	67205	Drug-induced_liver_injury	Hepatocellular_damage_and_hepatitis_NEC	Hepatic_and_hepatobiliary_disorders	Hepatobiliary_disorders
Drug-induced_liver_injury	O75907	15808	Drug-induced_liver_injury	Hepatocellular_damage_and_hepatitis_NEC	Hepatic_and_hepatobiliary_disorders	Hepatobiliary_disorders
Drug-induced_liver_injury	P37802	19026	Drug-induced_liver_injury	Hepatocellular_damage_and_hepatitis_NEC	Hepatic_and_hepatobiliary_disorders	Hepatobiliary_disorders
Drug-induced_liver_injury	Q15825	4978	Drug-induced_liver_injury	Hepatocellular_damage_and_hepatitis_NEC	Hepatic_and_hepatobiliary_disorders	Hepatobiliary_disorders
Drug-induced_liver_injury	Q00765	16440	Drug-induced_liver_injury	Hepatocellular_damage_and_hepatitis_NEC	Hepatic_and_hepatobiliary_disorders	Hepatobiliary_disorders
Drug-induced_liver_injury	P08670	6760	Drug-induced_liver_injury	Hepatocellular_damage_and_hepatitis_NEC	Hepatic_and_hepatobiliary_disorders	Hepatobiliary_disorders
Drug-induced_liver_injury	Q05707	19010	Drug-induced_liver_injury	Hepatocellular_damage_and_hepatitis_NEC	Hepatic_and_hepatobiliary_disorders	Hepatobiliary_disorders
Drug-induced_liver_injury	P02766	36289	Drug-induced_liver_injury	Hepatocellular_damage_and_hepatitis_NEC	Hepatic_and_hepatobiliary_disorders	Hepatobiliary_disorders
Drug-induced_liver_injury	Q9UBN4	64538	Drug-induced_liver_injury	Hepatocellular_damage_and_hepatitis_NEC	Hepatic_and_hepatobiliary_disorders	Hepatobiliary_disorders
Drug-induced_liver_injury	P16035	27355	Drug-induced_liver_injury	Hepatocellular_damage_and_hepatitis_NEC	Hepatic_and_hepatobiliary_disorders	Hepatobiliary_disorders
Drug-induced_liver_injury	P35442	67276	Drug-induced_liver_injury	Hepatocellular_damage_and_hepatitis_NEC	Hepatic_and_hepatobiliary_disorders	Hepatobiliary_disorders
Drug-induced_liver_injury	P04275	7131	Drug-induced_liver_injury	Hepatocellular_damage_and_hepatitis_NEC	Hepatic_and_hepatobiliary_disorders	Hepatobiliary_disorders
Drug-induced_liver_injury	O00401	13479	Drug-induced_liver_injury	Hepatocellular_damage_and_hepatitis_NEC	Hepatic_and_hepatobiliary_disorders	Hepatobiliary_disorders
Drug-induced_liver_injury	Q13228	19304	Drug-induced_liver_injury	Hepatocellular_damage_and_hepatitis_NEC	Hepatic_and_hepatobiliary_disorders	Hepatobiliary_disorders
Drug-induced_liver_injury	Q15493	67186	Drug-induced_liver_injury	Hepatocellular_damage_and_hepatitis_NEC	Hepatic_and_hepatobiliary_disorders	Hepatobiliary_disorders
Drug-induced_liver_injury	Q9Y6Z7	47117	Drug-induced_liver_injury	Hepatocellular_damage_and_hepatitis_NEC	Hepatic_and_hepatobiliary_disorders	Hepatobiliary_disorders
Drug-induced_liver_injury	Q9UBM1	68189	Drug-induced_liver_injury	Hepatocellular_damage_and_hepatitis_NEC	Hepatic_and_hepatobiliary_disorders	Hepatobiliary_disorders
Drug-induced_liver_injury	P51679	38990	Drug-induced_liver_injury	Hepatocellular_damage_and_hepatitis_NEC	Hepatic_and_hepatobiliary_disorders	Hepatobiliary_disorders
Drug-induced_liver_injury	O60895	60802	Drug-induced_liver_injury	Hepatocellular_damage_and_hepatitis_NEC	Hepatic_and_hepatobiliary_disorders	Hepatobiliary_disorders
Drug-induced_liver_injury	Q13133	14702	Drug-induced_liver_injury	Hepatocellular_damage_and_hepatitis_NEC	Hepatic_and_hepatobiliary_disorders	Hepatobiliary_disorders
Drug-induced_liver_injury	Q96RI1	46856	Drug-induced_liver_injury	Hepatocellular_damage_and_hepatitis_NEC	Hepatic_and_hepatobiliary_disorders	Hepatobiliary_disorders
Drug-induced_liver_injury	Q14994	14102	Drug-induced_liver_injury	Hepatocellular_damage_and_hepatitis_NEC	Hepatic_and_hepatobiliary_disorders	Hepatobiliary_disorders
Drug-induced_liver_injury	Q504Q3	7246	Drug-induced_liver_injury	Hepatocellular_damage_and_hepatitis_NEC	Hepatic_and_hepatobiliary_disorders	Hepatobiliary_disorders
Drug-induced_liver_injury	Q92611	6439	Drug-induced_liver_injury	Hepatocellular_damage_and_hepatitis_NEC	Hepatic_and_hepatobiliary_disorders	Hepatobiliary_disorders
Drug-induced_liver_injury	Q9H1Y0	19536	Drug-induced_liver_injury	Hepatocellular_damage_and_hepatitis_NEC	Hepatic_and_hepatobiliary_disorders	Hepatobiliary_disorders
Drug-induced_liver_injury	O95864	16313	Drug-induced_liver_injury	Hepatocellular_damage_and_hepatitis_NEC	Hepatic_and_hepatobiliary_disorders	Hepatobiliary_disorders
Drug-induced_liver_injury	Q15848	8497	Drug-induced_liver_injury	Hepatocellular_damage_and_hepatitis_NEC	Hepatic_and_hepatobiliary_disorders	Hepatobiliary_disorders
Drug-induced_liver_injury	Q16612	35949	Drug-induced_liver_injury	Hepatocellular_damage_and_hepatitis_NEC	Hepatic_and_hepatobiliary_disorders	Hepatobiliary_disorders
Drug-induced_liver_injury	O60667	6190	Drug-induced_liver_injury	Hepatocellular_damage_and_hepatitis_NEC	Hepatic_and_hepatobiliary_disorders	Hepatobiliary_disorders
Drug-induced_liver_injury	O95831	10066	Drug-induced_liver_injury	Hepatocellular_damage_and_hepatitis_NEC	Hepatic_and_hepatobiliary_disorders	Hepatobiliary_disorders
Drug-induced_liver_injury	P10600	63378	Drug-induced_liver_injury	Hepatocellular_damage_and_hepatitis_NEC	Hepatic_and_hepatobiliary_disorders	Hepatobiliary_disorders
Drug-induced_liver_injury	Q16654	67065	Drug-induced_liver_injury	Hepatocellular_damage_and_hepatitis_NEC	Hepatic_and_hepatobiliary_disorders	Hepatobiliary_disorders
Drug-induced_liver_injury	P00747	59031	Drug-induced_liver_injury	Hepatocellular_damage_and_hepatitis_NEC	Hepatic_and_hepatobiliary_disorders	Hepatobiliary_disorders
Drug-induced_liver_injury	P49585	7677	Drug-induced_liver_injury	Hepatocellular_damage_and_hepatitis_NEC	Hepatic_and_hepatobiliary_disorders	Hepatobiliary_disorders
Drug-induced_liver_injury	P15169	17190	Drug-induced_liver_injury	Hepatocellular_damage_and_hepatitis_NEC	Hepatic_and_hepatobiliary_disorders	Hepatobiliary_disorders
Drug-induced_liver_injury	P35222	7148	Drug-induced_liver_injury	Hepatocellular_damage_and_hepatitis_NEC	Hepatic_and_hepatobiliary_disorders	Hepatobiliary_disorders
Drug-induced_liver_injury	P14091	36028	Drug-induced_liver_injury	Hepatocellular_damage_and_hepatitis_NEC	Hepatic_and_hepatobiliary_disorders	Hepatobiliary_disorders
Drug-induced_liver_injury	P54750	32792	Drug-induced_liver_injury	Hepatocellular_damage_and_hepatitis_NEC	Hepatic_and_hepatobiliary_disorders	Hepatobiliary_disorders
Drug-induced_liver_injury	P11712	48249	Drug-induced_liver_injury	Hepatocellular_damage_and_hepatitis_NEC	Hepatic_and_hepatobiliary_disorders	Hepatobiliary_disorders
Drug-induced_liver_injury	P08684	48345	Drug-induced_liver_injury	Hepatocellular_damage_and_hepatitis_NEC	Hepatic_and_hepatobiliary_disorders	Hepatobiliary_disorders
Drug-induced_liver_injury	P20815	13807	Drug-induced_liver_injury	Hepatocellular_damage_and_hepatitis_NEC	Hepatic_and_hepatobiliary_disorders	Hepatobiliary_disorders
Drug-induced_liver_injury	P24522	63171	Drug-induced_liver_injury	Hepatocellular_damage_and_hepatitis_NEC	Hepatic_and_hepatobiliary_disorders	Hepatobiliary_disorders
Drug-induced_liver_injury	P00374	61947	Drug-induced_liver_injury	Hepatocellular_damage_and_hepatitis_NEC	Hepatic_and_hepatobiliary_disorders	Hepatobiliary_disorders
Drug-induced_liver_injury	Q02487	27011	Drug-induced_liver_injury	Hepatocellular_damage_and_hepatitis_NEC	Hepatic_and_hepatobiliary_disorders	Hepatobiliary_disorders
Drug-induced_liver_injury	P06733	6558	Drug-induced_liver_injury	Hepatocellular_damage_and_hepatitis_NEC	Hepatic_and_hepatobiliary_disorders	Hepatobiliary_disorders
Drug-induced_liver_injury	P07099	68355	Drug-induced_liver_injury	Hepatocellular_damage_and_hepatitis_NEC	Hepatic_and_hepatobiliary_disorders	Hepatobiliary_disorders
Drug-induced_liver_injury	P49327	16407	Drug-induced_liver_injury	Hepatocellular_damage_and_hepatitis_NEC	Hepatic_and_hepatobiliary_disorders	Hepatobiliary_disorders
Drug-induced_liver_injury	P05181	48284	Drug-induced_liver_injury	Hepatocellular_damage_and_hepatitis_NEC	Hepatic_and_hepatobiliary_disorders	Hepatobiliary_disorders
Drug-induced_liver_injury	Q96IY4	36960	Drug-induced_liver_injury	Hepatocellular_damage_and_hepatitis_NEC	Hepatic_and_hepatobiliary_disorders	Hepatobiliary_disorders
Drug-induced_liver_injury	P55899	63812	Drug-induced_liver_injury	Hepatocellular_damage_and_hepatitis_NEC	Hepatic_and_hepatobiliary_disorders	Hepatobiliary_disorders
Drug-induced_liver_injury	P02671	25152	Drug-induced_liver_injury	Hepatocellular_damage_and_hepatitis_NEC	Hepatic_and_hepatobiliary_disorders	Hepatobiliary_disorders
Drug-induced_liver_injury	P17948	14225	Drug-induced_liver_injury	Hepatocellular_damage_and_hepatitis_NEC	Hepatic_and_hepatobiliary_disorders	Hepatobiliary_disorders
Drug-induced_liver_injury	P31513	64134	Drug-induced_liver_injury	Hepatocellular_damage_and_hepatitis_NEC	Hepatic_and_hepatobiliary_disorders	Hepatobiliary_disorders
Drug-induced_liver_injury	P01350	63149	Drug-induced_liver_injury	Hepatocellular_damage_and_hepatitis_NEC	Hepatic_and_hepatobiliary_disorders	Hepatobiliary_disorders
Drug-induced_liver_injury	Q07869	19279	Drug-induced_liver_injury	Hepatocellular_damage_and_hepatitis_NEC	Hepatic_and_hepatobiliary_disorders	Hepatobiliary_disorders
Drug-induced_liver_injury	P48169	63916	Drug-induced_liver_injury	Hepatocellular_damage_and_hepatitis_NEC	Hepatic_and_hepatobiliary_disorders	Hepatobiliary_disorders
Drug-induced_liver_injury	P02774	31086	Drug-induced_liver_injury	Hepatocellular_damage_and_hepatitis_NEC	Hepatic_and_hepatobiliary_disorders	Hepatobiliary_disorders
Drug-induced_liver_injury	Q99731	38222	Drug-induced_liver_injury	Hepatocellular_damage_and_hepatitis_NEC	Hepatic_and_hepatobiliary_disorders	Hepatobiliary_disorders
Drug-induced_liver_injury	P48506	64752	Drug-induced_liver_injury	Hepatocellular_damage_and_hepatitis_NEC	Hepatic_and_hepatobiliary_disorders	Hepatobiliary_disorders
Drug-induced_liver_injury	P17174	2281	Drug-induced_liver_injury	Hepatocellular_damage_and_hepatitis_NEC	Hepatic_and_hepatobiliary_disorders	Hepatobiliary_disorders
Drug-induced_liver_injury	P24298	10535	Drug-induced_liver_injury	Hepatocellular_damage_and_hepatitis_NEC	Hepatic_and_hepatobiliary_disorders	Hepatobiliary_disorders
Drug-induced_liver_injury	Q92583	38218	Drug-induced_liver_injury	Hepatocellular_damage_and_hepatitis_NEC	Hepatic_and_hepatobiliary_disorders	Hepatobiliary_disorders
Drug-induced_liver_injury	P09341	5835	Drug-induced_liver_injury	Hepatocellular_damage_and_hepatitis_NEC	Hepatic_and_hepatobiliary_disorders	Hepatobiliary_disorders
Drug-induced_liver_injury	P06396	12489	Drug-induced_liver_injury	Hepatocellular_damage_and_hepatitis_NEC	Hepatic_and_hepatobiliary_disorders	Hepatobiliary_disorders
Drug-induced_liver_injury	O15444	38253	Drug-induced_liver_injury	Hepatocellular_damage_and_hepatitis_NEC	Hepatic_and_hepatobiliary_disorders	Hepatobiliary_disorders
Drug-induced_liver_injury	P00450	40317	Drug-induced_liver_injury	Hepatocellular_damage_and_hepatitis_NEC	Hepatic_and_hepatobiliary_disorders	Hepatobiliary_disorders
Drug-induced_liver_injury	P02461	6730	Drug-induced_liver_injury	Hepatocellular_damage_and_hepatitis_NEC	Hepatic_and_hepatobiliary_disorders	Hepatobiliary_disorders
Drug-induced_liver_injury	P23946	45103	Drug-induced_liver_injury	Hepatocellular_damage_and_hepatitis_NEC	Hepatic_and_hepatobiliary_disorders	Hepatobiliary_disorders
Drug-induced_liver_injury	P00441	5081	Drug-induced_liver_injury	Hepatocellular_damage_and_hepatitis_NEC	Hepatic_and_hepatobiliary_disorders	Hepatobiliary_disorders
Drug-induced_liver_injury	Q8WWZ7	2930	Drug-induced_liver_injury	Hepatocellular_damage_and_hepatitis_NEC	Hepatic_and_hepatobiliary_disorders	Hepatobiliary_disorders
Drug-induced_liver_injury	P11245	18473	Drug-induced_liver_injury	Hepatocellular_damage_and_hepatitis_NEC	Hepatic_and_hepatobiliary_disorders	Hepatobiliary_disorders
Drug-induced_liver_injury	P14621	8004	Drug-induced_liver_injury	Hepatocellular_damage_and_hepatitis_NEC	Hepatic_and_hepatobiliary_disorders	Hepatobiliary_disorders
Drug-induced_liver_injury	P78325	8156	Drug-induced_liver_injury	Hepatocellular_damage_and_hepatitis_NEC	Hepatic_and_hepatobiliary_disorders	Hepatobiliary_disorders
Drug-induced_liver_injury	P18509	60509	Drug-induced_liver_injury	Hepatocellular_damage_and_hepatitis_NEC	Hepatic_and_hepatobiliary_disorders	Hepatobiliary_disorders
Drug-induced_liver_injury	P41586	64434	Drug-induced_liver_injury	Hepatocellular_damage_and_hepatitis_NEC	Hepatic_and_hepatobiliary_disorders	Hepatobiliary_disorders
Drug-induced_liver_injury	P35869	9964	Drug-induced_liver_injury	Hepatocellular_damage_and_hepatitis_NEC	Hepatic_and_hepatobiliary_disorders	Hepatobiliary_disorders
Drug-induced_liver_injury	P02768	10572	Drug-induced_liver_injury	Hepatocellular_damage_and_hepatitis_NEC	Hepatic_and_hepatobiliary_disorders	Hepatobiliary_disorders
Drug-induced_liver_injury	P05062	6332	Drug-induced_liver_injury	Hepatocellular_damage_and_hepatitis_NEC	Hepatic_and_hepatobiliary_disorders	Hepatobiliary_disorders
Drug-induced_liver_injury	P02760	11732	Drug-induced_liver_injury	Hepatocellular_damage_and_hepatitis_NEC	Hepatic_and_hepatobiliary_disorders	Hepatobiliary_disorders
Drug-induced_liver_injury	P07355	6028	Drug-induced_liver_injury	Hepatocellular_damage_and_hepatitis_NEC	Hepatic_and_hepatobiliary_disorders	Hepatobiliary_disorders
Drug-induced_liver_injury	Q13790	14356	Drug-induced_liver_injury	Hepatocellular_damage_and_hepatitis_NEC	Hepatic_and_hepatobiliary_disorders	Hepatobiliary_disorders
Drug-induced_liver_injury	P02647	14130	Drug-induced_liver_injury	Hepatocellular_damage_and_hepatitis_NEC	Hepatic_and_hepatobiliary_disorders	Hepatobiliary_disorders
Drug-induced_liver_injury	P02654	14231	Drug-induced_liver_injury	Hepatocellular_damage_and_hepatitis_NEC	Hepatic_and_hepatobiliary_disorders	Hepatobiliary_disorders
Drug-induced_liver_injury	P02649	14325	Drug-induced_liver_injury	Hepatocellular_damage_and_hepatitis_NEC	Hepatic_and_hepatobiliary_disorders	Hepatobiliary_disorders
Drug-induced_liver_injury	P02749	14366	Drug-induced_liver_injury	Hepatocellular_damage_and_hepatitis_NEC	Hepatic_and_hepatobiliary_disorders	Hepatobiliary_disorders
Drug-induced_liver_injury	P10909	15909	Drug-induced_liver_injury	Hepatocellular_damage_and_hepatitis_NEC	Hepatic_and_hepatobiliary_disorders	Hepatobiliary_disorders
Drug-induced_liver_injury	Q92903	39874	Drug-induced_liver_injury	Hepatocellular_damage_and_hepatitis_NEC	Hepatic_and_hepatobiliary_disorders	Hepatobiliary_disorders
Drug-induced_liver_injury	P30305	26625	Drug-induced_liver_injury	Hepatocellular_damage_and_hepatitis_NEC	Hepatic_and_hepatobiliary_disorders	Hepatobiliary_disorders
Drug-induced_liver_injury	P04040	6316	Drug-induced_liver_injury	Hepatocellular_damage_and_hepatitis_NEC	Hepatic_and_hepatobiliary_disorders	Hepatobiliary_disorders
Drug-induced_liver_injury	P49662	21878	Drug-induced_liver_injury	Hepatocellular_damage_and_hepatitis_NEC	Hepatic_and_hepatobiliary_disorders	Hepatobiliary_disorders
Drug-induced_liver_injury	P29466	21879	Drug-induced_liver_injury	Hepatocellular_damage_and_hepatitis_NEC	Hepatic_and_hepatobiliary_disorders	Hepatobiliary_disorders
Drug-induced_liver_injury	P00390	12485	Drug-induced_liver_injury	Hepatocellular_damage_and_hepatitis_NEC	Hepatic_and_hepatobiliary_disorders	Hepatobiliary_disorders
Drug-induced_liver_injury	P01024	12458	Drug-induced_liver_injury	Hepatocellular_damage_and_hepatitis_NEC	Hepatic_and_hepatobiliary_disorders	Hepatobiliary_disorders
Drug-induced_liver_injury	P05155	5574	Drug-induced_liver_injury	Hepatocellular_damage_and_hepatitis_NEC	Hepatic_and_hepatobiliary_disorders	Hepatobiliary_disorders
Drug-induced_liver_injury	Q10588	29821	Drug-induced_liver_injury	Hepatocellular_damage_and_hepatitis_NEC	Hepatic_and_hepatobiliary_disorders	Hepatobiliary_disorders
Drug-induced_liver_injury	Q07812	14678	Drug-induced_liver_injury	Hepatocellular_damage_and_hepatitis_NEC	Hepatic_and_hepatobiliary_disorders	Hepatobiliary_disorders
Drug-induced_liver_injury	P27540	17014	Drug-induced_liver_injury	Hepatocellular_damage_and_hepatitis_NEC	Hepatic_and_hepatobiliary_disorders	Hepatobiliary_disorders
Drug-induced_liver_injury	P01375	12447	Drug-induced_liver_injury	Hepatocellular_damage_and_hepatitis_NEC	Hepatic_and_hepatobiliary_disorders	Hepatobiliary_disorders
Drug-induced_liver_injury	P05089	16188	Drug-induced_liver_injury	Hepatocellular_damage_and_hepatitis_NEC	Hepatic_and_hepatobiliary_disorders	Hepatobiliary_disorders
Drug-induced_liver_injury	P00736	30948	Drug-induced_liver_injury	Hepatocellular_damage_and_hepatitis_NEC	Hepatic_and_hepatobiliary_disorders	Hepatobiliary_disorders
Drug-induced_liver_injury	P09488	64511	Drug-induced_liver_injury	Hepatocellular_damage_and_hepatitis_NEC	Hepatic_and_hepatobiliary_disorders	Hepatobiliary_disorders
Drug-induced_liver_injury	O00626	38241	Drug-induced_liver_injury	Hepatocellular_damage_and_hepatitis_NEC	Hepatic_and_hepatobiliary_disorders	Hepatobiliary_disorders
Drug-induced_liver_injury	P21266	64301	Drug-induced_liver_injury	Hepatocellular_damage_and_hepatitis_NEC	Hepatic_and_hepatobiliary_disorders	Hepatobiliary_disorders
Drug-induced_liver_injury	P32881	67231	Drug-induced_liver_injury	Hepatocellular_damage_and_hepatitis_NEC	Hepatic_and_hepatobiliary_disorders	Hepatobiliary_disorders
Drug-induced_liver_injury	P48551	7353	Drug-induced_liver_injury	Hepatocellular_damage_and_hepatitis_NEC	Hepatic_and_hepatobiliary_disorders	Hepatobiliary_disorders
Drug-induced_liver_injury	P13236	37526	Drug-induced_liver_injury	Hepatocellular_damage_and_hepatitis_NEC	Hepatic_and_hepatobiliary_disorders	Hepatobiliary_disorders
Drug-induced_liver_injury	P01574	65211	Drug-induced_liver_injury	Hepatocellular_damage_and_hepatitis_NEC	Hepatic_and_hepatobiliary_disorders	Hepatobiliary_disorders
Drug-induced_liver_injury	P05019	62788	Drug-induced_liver_injury	Hepatocellular_damage_and_hepatitis_NEC	Hepatic_and_hepatobiliary_disorders	Hepatobiliary_disorders
Drug-induced_liver_injury	P18065	69675	Drug-induced_liver_injury	Hepatocellular_damage_and_hepatitis_NEC	Hepatic_and_hepatobiliary_disorders	Hepatobiliary_disorders
Drug-induced_liver_injury	P13500	38273	Drug-induced_liver_injury	Hepatocellular_damage_and_hepatitis_NEC	Hepatic_and_hepatobiliary_disorders	Hepatobiliary_disorders
Drug-induced_liver_injury	P08253	19136	Drug-induced_liver_injury	Hepatocellular_damage_and_hepatitis_NEC	Hepatic_and_hepatobiliary_disorders	Hepatobiliary_disorders
Drug-induced_liver_injury	P01583	63891	Drug-induced_liver_injury	Hepatocellular_damage_and_hepatitis_NEC	Hepatic_and_hepatobiliary_disorders	Hepatobiliary_disorders
Drug-induced_liver_injury	Q99683	14019	Drug-induced_liver_injury	Hepatocellular_damage_and_hepatitis_NEC	Hepatic_and_hepatobiliary_disorders	Hepatobiliary_disorders
Drug-induced_liver_injury	P01584	12439	Drug-induced_liver_injury	Hepatocellular_damage_and_hepatitis_NEC	Hepatic_and_hepatobiliary_disorders	Hepatobiliary_disorders
Drug-induced_liver_injury	P40925	65686	Drug-induced_liver_injury	Hepatocellular_damage_and_hepatitis_NEC	Hepatic_and_hepatobiliary_disorders	Hepatobiliary_disorders
Drug-induced_liver_injury	P05112	62468	Drug-induced_liver_injury	Hepatocellular_damage_and_hepatitis_NEC	Hepatic_and_hepatobiliary_disorders	Hepatobiliary_disorders
Drug-induced_liver_injury	Q9UBS3	16232	Drug-induced_liver_injury	Hepatocellular_damage_and_hepatitis_NEC	Hepatic_and_hepatobiliary_disorders	Hepatobiliary_disorders
Drug-induced_liver_injury	P22362	38226	Drug-induced_liver_injury	Hepatocellular_damage_and_hepatitis_NEC	Hepatic_and_hepatobiliary_disorders	Hepatobiliary_disorders
Drug-induced_liver_injury	P28161	69614	Drug-induced_liver_injury	Hepatocellular_damage_and_hepatitis_NEC	Hepatic_and_hepatobiliary_disorders	Hepatobiliary_disorders
Drug-induced_liver_injury	P05231	17383	Drug-induced_liver_injury	Hepatocellular_damage_and_hepatitis_NEC	Hepatic_and_hepatobiliary_disorders	Hepatobiliary_disorders
Drug-induced_liver_injury	P08887	17382	Drug-induced_liver_injury	Hepatocellular_damage_and_hepatitis_NEC	Hepatic_and_hepatobiliary_disorders	Hepatobiliary_disorders
Drug-induced_liver_injury	P02788	17732	Drug-induced_liver_injury	Hepatocellular_damage_and_hepatitis_NEC	Hepatic_and_hepatobiliary_disorders	Hepatobiliary_disorders
Drug-induced_liver_injury	Q9NPB9	5127	Drug-induced_liver_injury	Hepatocellular_damage_and_hepatitis_NEC	Hepatic_and_hepatobiliary_disorders	Hepatobiliary_disorders
Drug-induced_liver_injury	P20809	64460	Drug-induced_liver_injury	Hepatocellular_damage_and_hepatitis_NEC	Hepatic_and_hepatobiliary_disorders	Hepatobiliary_disorders
Drug-induced_liver_injury	Q16552	63005	Drug-induced_liver_injury	Hepatocellular_damage_and_hepatitis_NEC	Hepatic_and_hepatobiliary_disorders	Hepatobiliary_disorders
Drug-induced_liver_injury	Q14116	24393	Drug-induced_liver_injury	Hepatocellular_damage_and_hepatitis_NEC	Hepatic_and_hepatobiliary_disorders	Hepatobiliary_disorders
Drug-induced_liver_injury	Q14643	26005	Drug-induced_liver_injury	Hepatocellular_damage_and_hepatitis_NEC	Hepatic_and_hepatobiliary_disorders	Hepatobiliary_disorders
Drug-induced_liver_injury	P01042	13075	Drug-induced_liver_injury	Hepatocellular_damage_and_hepatitis_NEC	Hepatic_and_hepatobiliary_disorders	Hepatobiliary_disorders
Drug-induced_liver_injury	P05783	13475	Drug-induced_liver_injury	Hepatocellular_damage_and_hepatitis_NEC	Hepatic_and_hepatobiliary_disorders	Hepatobiliary_disorders
Drug-induced_liver_injury	O43900	28790	Drug-induced_liver_injury	Hepatocellular_damage_and_hepatitis_NEC	Hepatic_and_hepatobiliary_disorders	Hepatobiliary_disorders
Drug-induced_liver_injury	P18428	64958	Drug-induced_liver_injury	Hepatocellular_damage_and_hepatitis_NEC	Hepatic_and_hepatobiliary_disorders	Hepatobiliary_disorders
Drug-induced_liver_injury	P04180	68933	Drug-induced_liver_injury	Hepatocellular_damage_and_hepatitis_NEC	Hepatic_and_hepatobiliary_disorders	Hepatobiliary_disorders
Drug-induced_liver_injury	P80098	35691	Drug-induced_liver_injury	Hepatocellular_damage_and_hepatitis_NEC	Hepatic_and_hepatobiliary_disorders	Hepatobiliary_disorders
Drug-induced_liver_injury	O60427	15858	Drug-induced_liver_injury	Hepatocellular_damage_and_hepatitis_NEC	Hepatic_and_hepatobiliary_disorders	Hepatobiliary_disorders
Drug-induced_liver_injury	P01569	63712	Drug-induced_liver_injury	Hepatocellular_damage_and_hepatitis_NEC	Hepatic_and_hepatobiliary_disorders	Hepatobiliary_disorders
Drug-induced_liver_injury	P01563	62530	Drug-induced_liver_injury	Hepatocellular_damage_and_hepatitis_NEC	Hepatic_and_hepatobiliary_disorders	Hepatobiliary_disorders
Drug-induced_liver_injury	Q15113	15704	Drug-induced_liver_injury	Hepatocellular_damage_and_hepatitis_NEC	Hepatic_and_hepatobiliary_disorders	Hepatobiliary_disorders
Drug-induced_liver_injury	Q03013	36421	Drug-induced_liver_injury	Hepatocellular_damage_and_hepatitis_NEC	Hepatic_and_hepatobiliary_disorders	Hepatobiliary_disorders
Drug-induced_liver_injury	P46439	63235	Drug-induced_liver_injury	Hepatocellular_damage_and_hepatitis_NEC	Hepatic_and_hepatobiliary_disorders	Hepatobiliary_disorders
Drug-induced_liver_injury	P09211	5836	Drug-induced_liver_injury	Hepatocellular_damage_and_hepatitis_NEC	Hepatic_and_hepatobiliary_disorders	Hepatobiliary_disorders
Drug-induced_liver_injury	O15467	38213	Drug-induced_liver_injury	Hepatocellular_damage_and_hepatitis_NEC	Hepatic_and_hepatobiliary_disorders	Hepatobiliary_disorders
Drug-induced_liver_injury	P30711	63689	Drug-induced_liver_injury	Hepatocellular_damage_and_hepatitis_NEC	Hepatic_and_hepatobiliary_disorders	Hepatobiliary_disorders
Drug-induced_liver_injury	P13725	64645	Drug-induced_liver_injury	Hepatocellular_damage_and_hepatitis_NEC	Hepatic_and_hepatobiliary_disorders	Hepatobiliary_disorders
Drug-induced_liver_injury	P40939	6438	Drug-induced_liver_injury	Hepatocellular_damage_and_hepatitis_NEC	Hepatic_and_hepatobiliary_disorders	Hepatobiliary_disorders
Drug-induced_liver_injury	Q99616	38208	Drug-induced_liver_injury	Hepatocellular_damage_and_hepatitis_NEC	Hepatic_and_hepatobiliary_disorders	Hepatobiliary_disorders
Drug-induced_liver_injury	P00491	26840	Drug-induced_liver_injury	Hepatocellular_damage_and_hepatitis_NEC	Hepatic_and_hepatobiliary_disorders	Hepatobiliary_disorders
Drug-induced_liver_injury	Q16236	48549	Drug-induced_liver_injury	Hepatocellular_damage_and_hepatitis_NEC	Hepatic_and_hepatobiliary_disorders	Hepatobiliary_disorders
Drug-induced_liver_injury	P04439	394	Drug-induced_liver_injury	Hepatocellular_damage_and_hepatitis_NEC	Hepatic_and_hepatobiliary_disorders	Hepatobiliary_disorders
Drug-induced_liver_injury	P80075	38327	Drug-induced_liver_injury	Hepatocellular_damage_and_hepatitis_NEC	Hepatic_and_hepatobiliary_disorders	Hepatobiliary_disorders
Drug-induced_liver_injury	P42898	20195	Drug-induced_liver_injury	Hepatocellular_damage_and_hepatitis_NEC	Hepatic_and_hepatobiliary_disorders	Hepatobiliary_disorders
Drug-induced_liver_injury	P01889	546	Drug-induced_liver_injury	Hepatocellular_damage_and_hepatitis_NEC	Hepatic_and_hepatobiliary_disorders	Hepatobiliary_disorders
Drug-induced_liver_injury	P09238	64675	Drug-induced_liver_injury	Hepatocellular_damage_and_hepatitis_NEC	Hepatic_and_hepatobiliary_disorders	Hepatobiliary_disorders
Drug-induced_liver_injury	P01562	63561	Drug-induced_liver_injury	Hepatocellular_damage_and_hepatitis_NEC	Hepatic_and_hepatobiliary_disorders	Hepatobiliary_disorders
Drug-induced_liver_injury	P05156	40606	Drug-induced_liver_injury	Hepatocellular_damage_and_hepatitis_NEC	Hepatic_and_hepatobiliary_disorders	Hepatobiliary_disorders
Drug-induced_liver_injury	P02790	24232	Drug-induced_liver_injury	Hepatocellular_damage_and_hepatitis_NEC	Hepatic_and_hepatobiliary_disorders	Hepatobiliary_disorders
Drug-induced_liver_injury	Q04912	67246	Drug-induced_liver_injury	Hepatocellular_damage_and_hepatitis_NEC	Hepatic_and_hepatobiliary_disorders	Hepatobiliary_disorders
Drug-induced_liver_injury	P32754	23519	Drug-induced_liver_injury	Hepatocellular_damage_and_hepatitis_NEC	Hepatic_and_hepatobiliary_disorders	Hepatobiliary_disorders
Drug-induced_liver_injury	P45452	68912	Drug-induced_liver_injury	Hepatocellular_damage_and_hepatitis_NEC	Hepatic_and_hepatobiliary_disorders	Hepatobiliary_disorders
Drug-induced_liver_injury	P09601	5452	Drug-induced_liver_injury	Hepatocellular_damage_and_hepatitis_NEC	Hepatic_and_hepatobiliary_disorders	Hepatobiliary_disorders
Drug-induced_liver_injury	P09429	5450	Drug-induced_liver_injury	Hepatocellular_damage_and_hepatitis_NEC	Hepatic_and_hepatobiliary_disorders	Hepatobiliary_disorders
Drug-induced_liver_injury	P41597	38951	Drug-induced_liver_injury	Hepatocellular_damage_and_hepatitis_NEC	Hepatic_and_hepatobiliary_disorders	Hepatobiliary_disorders
Drug-induced_liver_injury	P01911	689	Drug-induced_liver_injury	Hepatocellular_damage_and_hepatitis_NEC	Hepatic_and_hepatobiliary_disorders	Hepatobiliary_disorders
Drug-induced_liver_injury	P33527	15662	Drug-induced_liver_injury	Hepatocellular_damage_and_hepatitis_NEC	Hepatic_and_hepatobiliary_disorders	Hepatobiliary_disorders
Drug-induced_liver_injury	P02778	51343	Drug-induced_liver_injury	Hepatocellular_damage_and_hepatitis_NEC	Hepatic_and_hepatobiliary_disorders	Hepatobiliary_disorders
Drug-induced_liver_injury	P17931	7011	Drug-induced_liver_injury	Hepatocellular_damage_and_hepatitis_NEC	Hepatic_and_hepatobiliary_disorders	Hepatobiliary_disorders
Fatty_liver_alcoholic	Q8WWZ7	2930	Fatty_liver_alcoholic	Hepatocellular_damage_and_hepatitis_NEC	Hepatic_and_hepatobiliary_disorders	Hepatobiliary_disorders
Fatty_liver_alcoholic	Q07869	19279	Fatty_liver_alcoholic	Hepatocellular_damage_and_hepatitis_NEC	Hepatic_and_hepatobiliary_disorders	Hepatobiliary_disorders
Fatty_liver_alcoholic	P00441	5081	Fatty_liver_alcoholic	Hepatocellular_damage_and_hepatitis_NEC	Hepatic_and_hepatobiliary_disorders	Hepatobiliary_disorders
Fatty_liver_alcoholic	P05181	48284	Fatty_liver_alcoholic	Hepatocellular_damage_and_hepatitis_NEC	Hepatic_and_hepatobiliary_disorders	Hepatobiliary_disorders
Hepatic_cirrhosis	P13726	63692	Hepatic_cirrhosis	Hepatic_fibrosis_and_cirrhosis	Hepatic_and_hepatobiliary_disorders	Hepatobiliary_disorders
Hepatic_cirrhosis	P16112	68253	Hepatic_cirrhosis	Hepatic_fibrosis_and_cirrhosis	Hepatic_and_hepatobiliary_disorders	Hepatobiliary_disorders
Hepatic_cirrhosis	P17535	17282	Hepatic_cirrhosis	Hepatic_fibrosis_and_cirrhosis	Hepatic_and_hepatobiliary_disorders	Hepatobiliary_disorders
Hepatic_cirrhosis	P80365	57570	Hepatic_cirrhosis	Hepatic_fibrosis_and_cirrhosis	Hepatic_and_hepatobiliary_disorders	Hepatobiliary_disorders
Hepatic_cirrhosis	P01019	12280	Hepatic_cirrhosis	Hepatic_fibrosis_and_cirrhosis	Hepatic_and_hepatobiliary_disorders	Hepatobiliary_disorders
Hepatic_cirrhosis	P14210	14300	Hepatic_cirrhosis	Hepatic_fibrosis_and_cirrhosis	Hepatic_and_hepatobiliary_disorders	Hepatobiliary_disorders
Hepatic_cirrhosis	Q92769	17385	Hepatic_cirrhosis	Hepatic_fibrosis_and_cirrhosis	Hepatic_and_hepatobiliary_disorders	Hepatobiliary_disorders
Hepatic_cirrhosis	P21802	12961	Hepatic_cirrhosis	Hepatic_fibrosis_and_cirrhosis	Hepatic_and_hepatobiliary_disorders	Hepatobiliary_disorders
Hepatic_cirrhosis	P35348	8072	Hepatic_cirrhosis	Hepatic_fibrosis_and_cirrhosis	Hepatic_and_hepatobiliary_disorders	Hepatobiliary_disorders
Hepatic_cirrhosis	P31371	64553	Hepatic_cirrhosis	Hepatic_fibrosis_and_cirrhosis	Hepatic_and_hepatobiliary_disorders	Hepatobiliary_disorders
Hepatic_cirrhosis	P21781	67670	Hepatic_cirrhosis	Hepatic_fibrosis_and_cirrhosis	Hepatic_and_hepatobiliary_disorders	Hepatobiliary_disorders
Hepatic_cirrhosis	P13716	14661	Hepatic_cirrhosis	Hepatic_fibrosis_and_cirrhosis	Hepatic_and_hepatobiliary_disorders	Hepatobiliary_disorders
Hepatic_cirrhosis	P10767	64038	Hepatic_cirrhosis	Hepatic_fibrosis_and_cirrhosis	Hepatic_and_hepatobiliary_disorders	Hepatobiliary_disorders
Hepatic_cirrhosis	P62736	7433	Hepatic_cirrhosis	Hepatic_fibrosis_and_cirrhosis	Hepatic_and_hepatobiliary_disorders	Hepatobiliary_disorders
Hepatic_cirrhosis	P09038	24412	Hepatic_cirrhosis	Hepatic_fibrosis_and_cirrhosis	Hepatic_and_hepatobiliary_disorders	Hepatobiliary_disorders
Hepatic_cirrhosis	P49407	5402	Hepatic_cirrhosis	Hepatic_fibrosis_and_cirrhosis	Hepatic_and_hepatobiliary_disorders	Hepatobiliary_disorders
Hepatic_cirrhosis	O00602	67862	Hepatic_cirrhosis	Hepatic_fibrosis_and_cirrhosis	Hepatic_and_hepatobiliary_disorders	Hepatobiliary_disorders
Hepatic_cirrhosis	P35670	21273	Hepatic_cirrhosis	Hepatic_fibrosis_and_cirrhosis	Hepatic_and_hepatobiliary_disorders	Hepatobiliary_disorders
Hepatic_cirrhosis	P01023	1481	Hepatic_cirrhosis	Hepatic_fibrosis_and_cirrhosis	Hepatic_and_hepatobiliary_disorders	Hepatobiliary_disorders
Hepatic_cirrhosis	P02746	7930	Hepatic_cirrhosis	Hepatic_fibrosis_and_cirrhosis	Hepatic_and_hepatobiliary_disorders	Hepatobiliary_disorders
Hepatic_cirrhosis	P35555	13702	Hepatic_cirrhosis	Hepatic_fibrosis_and_cirrhosis	Hepatic_and_hepatobiliary_disorders	Hepatobiliary_disorders
Hepatic_cirrhosis	P50454	42390	Hepatic_cirrhosis	Hepatic_fibrosis_and_cirrhosis	Hepatic_and_hepatobiliary_disorders	Hepatobiliary_disorders
Hepatic_cirrhosis	P08571	30546	Hepatic_cirrhosis	Hepatic_fibrosis_and_cirrhosis	Hepatic_and_hepatobiliary_disorders	Hepatobiliary_disorders
Hepatic_cirrhosis	P02452	6734	Hepatic_cirrhosis	Hepatic_fibrosis_and_cirrhosis	Hepatic_and_hepatobiliary_disorders	Hepatobiliary_disorders
Hepatic_cirrhosis	P08123	6731	Hepatic_cirrhosis	Hepatic_fibrosis_and_cirrhosis	Hepatic_and_hepatobiliary_disorders	Hepatobiliary_disorders
Hepatic_cirrhosis	P12259	68144	Hepatic_cirrhosis	Hepatic_fibrosis_and_cirrhosis	Hepatic_and_hepatobiliary_disorders	Hepatobiliary_disorders
Hepatic_cirrhosis	P05997	29867	Hepatic_cirrhosis	Hepatic_fibrosis_and_cirrhosis	Hepatic_and_hepatobiliary_disorders	Hepatobiliary_disorders
Hepatic_cirrhosis	P29279	12938	Hepatic_cirrhosis	Hepatic_fibrosis_and_cirrhosis	Hepatic_and_hepatobiliary_disorders	Hepatobiliary_disorders
Hepatic_cirrhosis	Q9UBM7	32643	Hepatic_cirrhosis	Hepatic_fibrosis_and_cirrhosis	Hepatic_and_hepatobiliary_disorders	Hepatobiliary_disorders
Hepatic_cirrhosis	P00734	45326	Hepatic_cirrhosis	Hepatic_fibrosis_and_cirrhosis	Hepatic_and_hepatobiliary_disorders	Hepatobiliary_disorders
Hepatic_cirrhosis	P25116	7668	Hepatic_cirrhosis	Hepatic_fibrosis_and_cirrhosis	Hepatic_and_hepatobiliary_disorders	Hepatobiliary_disorders
Hepatic_cirrhosis	P13498	51399	Hepatic_cirrhosis	Hepatic_fibrosis_and_cirrhosis	Hepatic_and_hepatobiliary_disorders	Hepatobiliary_disorders
Hepatic_cirrhosis	P01137	5665	Hepatic_cirrhosis	Hepatic_fibrosis_and_cirrhosis	Hepatic_and_hepatobiliary_disorders	Hepatobiliary_disorders
Hepatic_cirrhosis	P05787	12732	Hepatic_cirrhosis	Hepatic_fibrosis_and_cirrhosis	Hepatic_and_hepatobiliary_disorders	Hepatobiliary_disorders
Hepatic_cirrhosis	P42224	7240	Hepatic_cirrhosis	Hepatic_fibrosis_and_cirrhosis	Hepatic_and_hepatobiliary_disorders	Hepatobiliary_disorders
Hepatic_cirrhosis	P61812	68149	Hepatic_cirrhosis	Hepatic_fibrosis_and_cirrhosis	Hepatic_and_hepatobiliary_disorders	Hepatobiliary_disorders
Hepatic_cirrhosis	Q03167	61451	Hepatic_cirrhosis	Hepatic_fibrosis_and_cirrhosis	Hepatic_and_hepatobiliary_disorders	Hepatobiliary_disorders
Hepatic_cirrhosis	P07996	45284	Hepatic_cirrhosis	Hepatic_fibrosis_and_cirrhosis	Hepatic_and_hepatobiliary_disorders	Hepatobiliary_disorders
Hepatic_cirrhosis	P15692	6770	Hepatic_cirrhosis	Hepatic_fibrosis_and_cirrhosis	Hepatic_and_hepatobiliary_disorders	Hepatobiliary_disorders
Hepatic_cirrhosis	P04004	58635	Hepatic_cirrhosis	Hepatic_fibrosis_and_cirrhosis	Hepatic_and_hepatobiliary_disorders	Hepatobiliary_disorders
Hepatic_cirrhosis	O14863	61532	Hepatic_cirrhosis	Hepatic_fibrosis_and_cirrhosis	Hepatic_and_hepatobiliary_disorders	Hepatobiliary_disorders
Hepatic_cirrhosis	P09486	7446	Hepatic_cirrhosis	Hepatic_fibrosis_and_cirrhosis	Hepatic_and_hepatobiliary_disorders	Hepatobiliary_disorders
Hepatic_cirrhosis	O60462	65861	Hepatic_cirrhosis	Hepatic_fibrosis_and_cirrhosis	Hepatic_and_hepatobiliary_disorders	Hepatobiliary_disorders
Hepatic_cirrhosis	Q9UHI8	23110	Hepatic_cirrhosis	Hepatic_fibrosis_and_cirrhosis	Hepatic_and_hepatobiliary_disorders	Hepatobiliary_disorders
Hepatic_cirrhosis	O95931	37198	Hepatic_cirrhosis	Hepatic_fibrosis_and_cirrhosis	Hepatic_and_hepatobiliary_disorders	Hepatobiliary_disorders
Hepatic_cirrhosis	Q6ICB0	6688	Hepatic_cirrhosis	Hepatic_fibrosis_and_cirrhosis	Hepatic_and_hepatobiliary_disorders	Hepatobiliary_disorders
Hepatic_cirrhosis	Q8TAX9	65232	Hepatic_cirrhosis	Hepatic_fibrosis_and_cirrhosis	Hepatic_and_hepatobiliary_disorders	Hepatobiliary_disorders
Hepatic_cirrhosis	Q9P281	24010	Hepatic_cirrhosis	Hepatic_fibrosis_and_cirrhosis	Hepatic_and_hepatobiliary_disorders	Hepatobiliary_disorders
Hepatic_cirrhosis	Q9HAV5	11873	Hepatic_cirrhosis	Hepatic_fibrosis_and_cirrhosis	Hepatic_and_hepatobiliary_disorders	Hepatobiliary_disorders
Hepatic_cirrhosis	P20333	62101	Hepatic_cirrhosis	Hepatic_fibrosis_and_cirrhosis	Hepatic_and_hepatobiliary_disorders	Hepatobiliary_disorders
Hepatic_cirrhosis	O14786	13801	Hepatic_cirrhosis	Hepatic_fibrosis_and_cirrhosis	Hepatic_and_hepatobiliary_disorders	Hepatobiliary_disorders
Hepatic_cirrhosis	P51172	67549	Hepatic_cirrhosis	Hepatic_fibrosis_and_cirrhosis	Hepatic_and_hepatobiliary_disorders	Hepatobiliary_disorders
Hepatic_cirrhosis	P00797	35571	Hepatic_cirrhosis	Hepatic_fibrosis_and_cirrhosis	Hepatic_and_hepatobiliary_disorders	Hepatobiliary_disorders
Hepatic_cirrhosis	P12272	63443	Hepatic_cirrhosis	Hepatic_fibrosis_and_cirrhosis	Hepatic_and_hepatobiliary_disorders	Hepatobiliary_disorders
Hepatic_cirrhosis	Q13751	30724	Hepatic_cirrhosis	Hepatic_fibrosis_and_cirrhosis	Hepatic_and_hepatobiliary_disorders	Hepatobiliary_disorders
Hepatic_cirrhosis	Q13753	63415	Hepatic_cirrhosis	Hepatic_fibrosis_and_cirrhosis	Hepatic_and_hepatobiliary_disorders	Hepatobiliary_disorders
Hepatic_cirrhosis	P09382	14084	Hepatic_cirrhosis	Hepatic_fibrosis_and_cirrhosis	Hepatic_and_hepatobiliary_disorders	Hepatobiliary_disorders
Hepatic_cirrhosis	Q08380	6361	Hepatic_cirrhosis	Hepatic_fibrosis_and_cirrhosis	Hepatic_and_hepatobiliary_disorders	Hepatobiliary_disorders
Hepatic_cirrhosis	P51884	69746	Hepatic_cirrhosis	Hepatic_fibrosis_and_cirrhosis	Hepatic_and_hepatobiliary_disorders	Hepatobiliary_disorders
Hepatic_cirrhosis	P84022	13465	Hepatic_cirrhosis	Hepatic_fibrosis_and_cirrhosis	Hepatic_and_hepatobiliary_disorders	Hepatobiliary_disorders
Hepatic_cirrhosis	P08473	67830	Hepatic_cirrhosis	Hepatic_fibrosis_and_cirrhosis	Hepatic_and_hepatobiliary_disorders	Hepatobiliary_disorders
Hepatic_cirrhosis	P08254	63985	Hepatic_cirrhosis	Hepatic_fibrosis_and_cirrhosis	Hepatic_and_hepatobiliary_disorders	Hepatobiliary_disorders
Hepatic_cirrhosis	P09237	53090	Hepatic_cirrhosis	Hepatic_fibrosis_and_cirrhosis	Hepatic_and_hepatobiliary_disorders	Hepatobiliary_disorders
Hepatic_cirrhosis	P14780	12999	Hepatic_cirrhosis	Hepatic_fibrosis_and_cirrhosis	Hepatic_and_hepatobiliary_disorders	Hepatobiliary_disorders
Hepatic_cirrhosis	P51511	59132	Hepatic_cirrhosis	Hepatic_fibrosis_and_cirrhosis	Hepatic_and_hepatobiliary_disorders	Hepatobiliary_disorders
Hepatic_cirrhosis	P01160	12212	Hepatic_cirrhosis	Hepatic_fibrosis_and_cirrhosis	Hepatic_and_hepatobiliary_disorders	Hepatobiliary_disorders
Hepatic_cirrhosis	P49763	60665	Hepatic_cirrhosis	Hepatic_fibrosis_and_cirrhosis	Hepatic_and_hepatobiliary_disorders	Hepatobiliary_disorders
Hepatic_cirrhosis	P01009	1387	Hepatic_cirrhosis	Hepatic_fibrosis_and_cirrhosis	Hepatic_and_hepatobiliary_disorders	Hepatobiliary_disorders
Hepatic_cirrhosis	P00749	58637	Hepatic_cirrhosis	Hepatic_fibrosis_and_cirrhosis	Hepatic_and_hepatobiliary_disorders	Hepatobiliary_disorders
Hepatic_cirrhosis	O00469	15795	Hepatic_cirrhosis	Hepatic_fibrosis_and_cirrhosis	Hepatic_and_hepatobiliary_disorders	Hepatobiliary_disorders
Hepatic_cirrhosis	P24158	17766	Hepatic_cirrhosis	Hepatic_fibrosis_and_cirrhosis	Hepatic_and_hepatobiliary_disorders	Hepatobiliary_disorders
Hepatic_cirrhosis	Q03721	58715	Hepatic_cirrhosis	Hepatic_fibrosis_and_cirrhosis	Hepatic_and_hepatobiliary_disorders	Hepatobiliary_disorders
Hepatic_cirrhosis	O15118	52650	Hepatic_cirrhosis	Hepatic_fibrosis_and_cirrhosis	Hepatic_and_hepatobiliary_disorders	Hepatobiliary_disorders
Hepatic_cirrhosis	Q9H1C4	16293	Hepatic_cirrhosis	Hepatic_fibrosis_and_cirrhosis	Hepatic_and_hepatobiliary_disorders	Hepatobiliary_disorders
Hepatic_cirrhosis	Q16236	48549	Hepatic_cirrhosis	Hepatic_fibrosis_and_cirrhosis	Hepatic_and_hepatobiliary_disorders	Hepatobiliary_disorders
Hepatic_cirrhosis	P05783	13475	Hepatic_cirrhosis	Hepatic_fibrosis_and_cirrhosis	Hepatic_and_hepatobiliary_disorders	Hepatobiliary_disorders
Hepatic_cirrhosis	P08253	19136	Hepatic_cirrhosis	Hepatic_fibrosis_and_cirrhosis	Hepatic_and_hepatobiliary_disorders	Hepatobiliary_disorders
Hepatic_cirrhosis	P09238	64675	Hepatic_cirrhosis	Hepatic_fibrosis_and_cirrhosis	Hepatic_and_hepatobiliary_disorders	Hepatobiliary_disorders
Hepatic_cirrhosis	P45452	68912	Hepatic_cirrhosis	Hepatic_fibrosis_and_cirrhosis	Hepatic_and_hepatobiliary_disorders	Hepatobiliary_disorders
Hepatic_cirrhosis	P13725	64645	Hepatic_cirrhosis	Hepatic_fibrosis_and_cirrhosis	Hepatic_and_hepatobiliary_disorders	Hepatobiliary_disorders
Hepatic_cirrhosis	Q15113	15704	Hepatic_cirrhosis	Hepatic_fibrosis_and_cirrhosis	Hepatic_and_hepatobiliary_disorders	Hepatobiliary_disorders
Hepatic_cirrhosis	Q99574	52702	Hepatic_cirrhosis	Hepatic_fibrosis_and_cirrhosis	Hepatic_and_hepatobiliary_disorders	Hepatobiliary_disorders
Hepatic_cirrhosis	P10082	68038	Hepatic_cirrhosis	Hepatic_fibrosis_and_cirrhosis	Hepatic_and_hepatobiliary_disorders	Hepatobiliary_disorders
Hepatic_cirrhosis	P78556	38234	Hepatic_cirrhosis	Hepatic_fibrosis_and_cirrhosis	Hepatic_and_hepatobiliary_disorders	Hepatobiliary_disorders
Hepatic_cirrhosis	P80162	51236	Hepatic_cirrhosis	Hepatic_fibrosis_and_cirrhosis	Hepatic_and_hepatobiliary_disorders	Hepatobiliary_disorders
Hepatic_cirrhosis	P81133	15618	Hepatic_cirrhosis	Hepatic_fibrosis_and_cirrhosis	Hepatic_and_hepatobiliary_disorders	Hepatobiliary_disorders
Hepatic_cirrhosis	P10451	63379	Hepatic_cirrhosis	Hepatic_fibrosis_and_cirrhosis	Hepatic_and_hepatobiliary_disorders	Hepatobiliary_disorders
Hepatic_cirrhosis	P08887	17382	Hepatic_cirrhosis	Hepatic_fibrosis_and_cirrhosis	Hepatic_and_hepatobiliary_disorders	Hepatobiliary_disorders
Hepatic_cirrhosis	P10600	63378	Hepatic_cirrhosis	Hepatic_fibrosis_and_cirrhosis	Hepatic_and_hepatobiliary_disorders	Hepatobiliary_disorders
Hepatic_cirrhosis	P16035	27355	Hepatic_cirrhosis	Hepatic_fibrosis_and_cirrhosis	Hepatic_and_hepatobiliary_disorders	Hepatobiliary_disorders
Hepatic_cirrhosis	P08670	6760	Hepatic_cirrhosis	Hepatic_fibrosis_and_cirrhosis	Hepatic_and_hepatobiliary_disorders	Hepatobiliary_disorders
Hepatic_cirrhosis	P37802	19026	Hepatic_cirrhosis	Hepatic_fibrosis_and_cirrhosis	Hepatic_and_hepatobiliary_disorders	Hepatobiliary_disorders
Hepatic_cirrhosis	Q15493	67186	Hepatic_cirrhosis	Hepatic_fibrosis_and_cirrhosis	Hepatic_and_hepatobiliary_disorders	Hepatobiliary_disorders
Hepatic_cirrhosis	Q9UBM1	68189	Hepatic_cirrhosis	Hepatic_fibrosis_and_cirrhosis	Hepatic_and_hepatobiliary_disorders	Hepatobiliary_disorders
Hepatic_cirrhosis	Q9UBN1	38105	Hepatic_cirrhosis	Hepatic_fibrosis_and_cirrhosis	Hepatic_and_hepatobiliary_disorders	Hepatobiliary_disorders
Hepatic_cirrhosis	Q9NS61	24014	Hepatic_cirrhosis	Hepatic_fibrosis_and_cirrhosis	Hepatic_and_hepatobiliary_disorders	Hepatobiliary_disorders
Hepatic_cirrhosis	Q9NZI2	67494	Hepatic_cirrhosis	Hepatic_fibrosis_and_cirrhosis	Hepatic_and_hepatobiliary_disorders	Hepatobiliary_disorders
Hepatic_cirrhosis	Q9NZP8	30941	Hepatic_cirrhosis	Hepatic_fibrosis_and_cirrhosis	Hepatic_and_hepatobiliary_disorders	Hepatobiliary_disorders
Hepatic_cirrhosis	Q96GW7	45368	Hepatic_cirrhosis	Hepatic_fibrosis_and_cirrhosis	Hepatic_and_hepatobiliary_disorders	Hepatobiliary_disorders
Hepatic_cirrhosis	P21926	39401	Hepatic_cirrhosis	Hepatic_fibrosis_and_cirrhosis	Hepatic_and_hepatobiliary_disorders	Hepatobiliary_disorders
Hepatic_cirrhosis	Q02318	48206	Hepatic_cirrhosis	Hepatic_fibrosis_and_cirrhosis	Hepatic_and_hepatobiliary_disorders	Hepatobiliary_disorders
Hepatic_cirrhosis	P36897	13028	Hepatic_cirrhosis	Hepatic_fibrosis_and_cirrhosis	Hepatic_and_hepatobiliary_disorders	Hepatobiliary_disorders
Hepatic_cirrhosis	P05231	17383	Hepatic_cirrhosis	Hepatic_fibrosis_and_cirrhosis	Hepatic_and_hepatobiliary_disorders	Hepatobiliary_disorders
Hepatic_cirrhosis	P35442	67276	Hepatic_cirrhosis	Hepatic_fibrosis_and_cirrhosis	Hepatic_and_hepatobiliary_disorders	Hepatobiliary_disorders
Hepatic_cirrhosis	P48551	7353	Hepatic_cirrhosis	Hepatic_fibrosis_and_cirrhosis	Hepatic_and_hepatobiliary_disorders	Hepatobiliary_disorders
Hepatic_cirrhosis	Q6XR72	28071	Hepatic_cirrhosis	Hepatic_fibrosis_and_cirrhosis	Hepatic_and_hepatobiliary_disorders	Hepatobiliary_disorders
Hepatic_cirrhosis	Q99731	38222	Hepatic_cirrhosis	Hepatic_fibrosis_and_cirrhosis	Hepatic_and_hepatobiliary_disorders	Hepatobiliary_disorders
Hepatic_cirrhosis	O15467	38213	Hepatic_cirrhosis	Hepatic_fibrosis_and_cirrhosis	Hepatic_and_hepatobiliary_disorders	Hepatobiliary_disorders
Hepatic_cirrhosis	P41597	38951	Hepatic_cirrhosis	Hepatic_fibrosis_and_cirrhosis	Hepatic_and_hepatobiliary_disorders	Hepatobiliary_disorders
Hepatic_cirrhosis	P13500	38273	Hepatic_cirrhosis	Hepatic_fibrosis_and_cirrhosis	Hepatic_and_hepatobiliary_disorders	Hepatobiliary_disorders
Hepatic_cirrhosis	P02768	10572	Hepatic_cirrhosis	Hepatic_fibrosis_and_cirrhosis	Hepatic_and_hepatobiliary_disorders	Hepatobiliary_disorders
Hepatic_cirrhosis	P22362	38226	Hepatic_cirrhosis	Hepatic_fibrosis_and_cirrhosis	Hepatic_and_hepatobiliary_disorders	Hepatobiliary_disorders
Hepatic_cirrhosis	P27540	17014	Hepatic_cirrhosis	Hepatic_fibrosis_and_cirrhosis	Hepatic_and_hepatobiliary_disorders	Hepatobiliary_disorders
Hepatic_cirrhosis	P21439	68100	Hepatic_cirrhosis	Hepatic_fibrosis_and_cirrhosis	Hepatic_and_hepatobiliary_disorders	Hepatobiliary_disorders
Hepatic_cirrhosis	P05155	5574	Hepatic_cirrhosis	Hepatic_fibrosis_and_cirrhosis	Hepatic_and_hepatobiliary_disorders	Hepatobiliary_disorders
Hepatic_cirrhosis	P02461	6730	Hepatic_cirrhosis	Hepatic_fibrosis_and_cirrhosis	Hepatic_and_hepatobiliary_disorders	Hepatobiliary_disorders
Hepatic_cirrhosis	P35222	7148	Hepatic_cirrhosis	Hepatic_fibrosis_and_cirrhosis	Hepatic_and_hepatobiliary_disorders	Hepatobiliary_disorders
Hepatic_cirrhosis	P28300	16400	Hepatic_cirrhosis	Hepatic_fibrosis_and_cirrhosis	Hepatic_and_hepatobiliary_disorders	Hepatobiliary_disorders
Hepatic_cirrhosis	P18065	69675	Hepatic_cirrhosis	Hepatic_fibrosis_and_cirrhosis	Hepatic_and_hepatobiliary_disorders	Hepatobiliary_disorders
Hepatic_cirrhosis	P17948	14225	Hepatic_cirrhosis	Hepatic_fibrosis_and_cirrhosis	Hepatic_and_hepatobiliary_disorders	Hepatobiliary_disorders
Hepatic_cirrhosis	P02774	31086	Hepatic_cirrhosis	Hepatic_fibrosis_and_cirrhosis	Hepatic_and_hepatobiliary_disorders	Hepatobiliary_disorders
Hepatic_cirrhosis	P51685	39008	Hepatic_cirrhosis	Hepatic_fibrosis_and_cirrhosis	Hepatic_and_hepatobiliary_disorders	Hepatobiliary_disorders
Hepatic_cirrhosis	P01562	63561	Hepatic_cirrhosis	Hepatic_fibrosis_and_cirrhosis	Hepatic_and_hepatobiliary_disorders	Hepatobiliary_disorders
Hepatic_cirrhosis	P01569	63712	Hepatic_cirrhosis	Hepatic_fibrosis_and_cirrhosis	Hepatic_and_hepatobiliary_disorders	Hepatobiliary_disorders
Hepatic_cirrhosis	P00450	40317	Hepatic_cirrhosis	Hepatic_fibrosis_and_cirrhosis	Hepatic_and_hepatobiliary_disorders	Hepatobiliary_disorders
Hepatic_cirrhosis	O15444	38253	Hepatic_cirrhosis	Hepatic_fibrosis_and_cirrhosis	Hepatic_and_hepatobiliary_disorders	Hepatobiliary_disorders
Hepatic_failure	P15692	6770	Hepatic_failure	Hepatic_failure_and_associated_disorders	Hepatic_and_hepatobiliary_disorders	Hepatobiliary_disorders
Hepatic_failure	P11310	3922	Hepatic_failure	Hepatic_failure_and_associated_disorders	Hepatic_and_hepatobiliary_disorders	Hepatobiliary_disorders
Hepatic_failure	P00734	45326	Hepatic_failure	Hepatic_failure_and_associated_disorders	Hepatic_and_hepatobiliary_disorders	Hepatobiliary_disorders
Hepatic_failure	P49763	60665	Hepatic_failure	Hepatic_failure_and_associated_disorders	Hepatic_and_hepatobiliary_disorders	Hepatobiliary_disorders
Hepatic_failure	O14786	13801	Hepatic_failure	Hepatic_failure_and_associated_disorders	Hepatic_and_hepatobiliary_disorders	Hepatobiliary_disorders
Hepatic_failure	Q9UHI8	23110	Hepatic_failure	Hepatic_failure_and_associated_disorders	Hepatic_and_hepatobiliary_disorders	Hepatobiliary_disorders
Hepatic_failure	P02763	1368	Hepatic_failure	Hepatic_failure_and_associated_disorders	Hepatic_and_hepatobiliary_disorders	Hepatobiliary_disorders
Hepatic_failure	O60462	65861	Hepatic_failure	Hepatic_failure_and_associated_disorders	Hepatic_and_hepatobiliary_disorders	Hepatobiliary_disorders
Hyperammonemia	P54840	61528	Hyperammonaemia	Protein_metabolism_disorders_NEC	Protein_and_amino_acid_metabolism_disorders_NEC	Metabolism_and_nutrition_disorders
Hyperammonemia	O14773	5781	Hyperammonaemia	Protein_metabolism_disorders_NEC	Protein_and_amino_acid_metabolism_disorders_NEC	Metabolism_and_nutrition_disorders
Hyperammonemia	Q13286	43840	Hyperammonaemia	Protein_metabolism_disorders_NEC	Protein_and_amino_acid_metabolism_disorders_NEC	Metabolism_and_nutrition_disorders
Hyperammonemia	P02458	45791	Hyperammonaemia	Protein_metabolism_disorders_NEC	Protein_and_amino_acid_metabolism_disorders_NEC	Metabolism_and_nutrition_disorders
Hyperammonemia	Q14031	45819	Hyperammonaemia	Protein_metabolism_disorders_NEC	Protein_and_amino_acid_metabolism_disorders_NEC	Metabolism_and_nutrition_disorders
Hyperammonemia	P31327	21450	Hyperammonaemia	Protein_metabolism_disorders_NEC	Protein_and_amino_acid_metabolism_disorders_NEC	Metabolism_and_nutrition_disorders
Hyperammonemia	P50416	16473	Hyperammonaemia	Protein_metabolism_disorders_NEC	Protein_and_amino_acid_metabolism_disorders_NEC	Metabolism_and_nutrition_disorders
Hyperammonemia	P23786	48713	Hyperammonaemia	Protein_metabolism_disorders_NEC	Protein_and_amino_acid_metabolism_disorders_NEC	Metabolism_and_nutrition_disorders
Hyperammonemia	P48506	64752	Hyperammonaemia	Protein_metabolism_disorders_NEC	Protein_and_amino_acid_metabolism_disorders_NEC	Metabolism_and_nutrition_disorders
Hyperammonemia	P11182	30146	Hyperammonaemia	Protein_metabolism_disorders_NEC	Protein_and_amino_acid_metabolism_disorders_NEC	Metabolism_and_nutrition_disorders
Hyperammonemia	P09622	30144	Hyperammonaemia	Protein_metabolism_disorders_NEC	Protein_and_amino_acid_metabolism_disorders_NEC	Metabolism_and_nutrition_disorders
Hyperammonemia	P13929	17804	Hyperammonaemia	Protein_metabolism_disorders_NEC	Protein_and_amino_acid_metabolism_disorders_NEC	Metabolism_and_nutrition_disorders
Hyperammonemia	P54753	46783	Hyperammonaemia	Protein_metabolism_disorders_NEC	Protein_and_amino_acid_metabolism_disorders_NEC	Metabolism_and_nutrition_disorders
Hyperammonemia	Q9UBY8	43864	Hyperammonaemia	Protein_metabolism_disorders_NEC	Protein_and_amino_acid_metabolism_disorders_NEC	Metabolism_and_nutrition_disorders
Hyperammonemia	P40939	6438	Hyperammonaemia	Protein_metabolism_disorders_NEC	Protein_and_amino_acid_metabolism_disorders_NEC	Metabolism_and_nutrition_disorders
Hyperammonemia	P13804	26846	Hyperammonaemia	Protein_metabolism_disorders_NEC	Protein_and_amino_acid_metabolism_disorders_NEC	Metabolism_and_nutrition_disorders
Hyperammonemia	Q02318	48206	Hyperammonaemia	Protein_metabolism_disorders_NEC	Protein_and_amino_acid_metabolism_disorders_NEC	Metabolism_and_nutrition_disorders
Hyperammonemia	P21926	39401	Hyperammonaemia	Protein_metabolism_disorders_NEC	Protein_and_amino_acid_metabolism_disorders_NEC	Metabolism_and_nutrition_disorders
Hyperammonemia	O43772	27523	Hyperammonaemia	Protein_metabolism_disorders_NEC	Protein_and_amino_acid_metabolism_disorders_NEC	Metabolism_and_nutrition_disorders
Hyperammonemia	Q13698	32537	Hyperammonaemia	Protein_metabolism_disorders_NEC	Protein_and_amino_acid_metabolism_disorders_NEC	Metabolism_and_nutrition_disorders
Hyperammonemia	Q86SQ9	57462	Hyperammonaemia	Protein_metabolism_disorders_NEC	Protein_and_amino_acid_metabolism_disorders_NEC	Metabolism_and_nutrition_disorders
Hyperammonemia	P38117	28792	Hyperammonaemia	Protein_metabolism_disorders_NEC	Protein_and_amino_acid_metabolism_disorders_NEC	Metabolism_and_nutrition_disorders
Hyperammonemia	P05089	16188	Hyperammonaemia	Protein_metabolism_disorders_NEC	Protein_and_amino_acid_metabolism_disorders_NEC	Metabolism_and_nutrition_disorders
Hyperammonemia	P11801	13766	Hyperammonaemia	Protein_metabolism_disorders_NEC	Protein_and_amino_acid_metabolism_disorders_NEC	Metabolism_and_nutrition_disorders
Hyperammonemia	P20815	13807	Hyperammonaemia	Protein_metabolism_disorders_NEC	Protein_and_amino_acid_metabolism_disorders_NEC	Metabolism_and_nutrition_disorders
Hyperammonemia	O00763	3875	Hyperammonaemia	Protein_metabolism_disorders_NEC	Protein_and_amino_acid_metabolism_disorders_NEC	Metabolism_and_nutrition_disorders
Hyperammonemia	P11310	3922	Hyperammonaemia	Protein_metabolism_disorders_NEC	Protein_and_amino_acid_metabolism_disorders_NEC	Metabolism_and_nutrition_disorders
Hyperammonemia	P32239	64900	Hyperammonaemia	Protein_metabolism_disorders_NEC	Protein_and_amino_acid_metabolism_disorders_NEC	Metabolism_and_nutrition_disorders
Hyperammonemia	P50053	63398	Hyperammonaemia	Protein_metabolism_disorders_NEC	Protein_and_amino_acid_metabolism_disorders_NEC	Metabolism_and_nutrition_disorders
Hyperammonemia	P49748	3944	Hyperammonaemia	Protein_metabolism_disorders_NEC	Protein_and_amino_acid_metabolism_disorders_NEC	Metabolism_and_nutrition_disorders
Hyperammonemia	P35573	19252	Hyperammonaemia	Protein_metabolism_disorders_NEC	Protein_and_amino_acid_metabolism_disorders_NEC	Metabolism_and_nutrition_disorders
Hyperammonemia	P15289	18378	Hyperammonaemia	Protein_metabolism_disorders_NEC	Protein_and_amino_acid_metabolism_disorders_NEC	Metabolism_and_nutrition_disorders
Hyperammonemia	P07307	18646	Hyperammonaemia	Protein_metabolism_disorders_NEC	Protein_and_amino_acid_metabolism_disorders_NEC	Metabolism_and_nutrition_disorders
Hyperammonemia	P04424	16841	Hyperammonaemia	Protein_metabolism_disorders_NEC	Protein_and_amino_acid_metabolism_disorders_NEC	Metabolism_and_nutrition_disorders
Hyperammonemia	P00966	19303	Hyperammonaemia	Protein_metabolism_disorders_NEC	Protein_and_amino_acid_metabolism_disorders_NEC	Metabolism_and_nutrition_disorders
Hyperammonemia	Q13825	23298	Hyperammonaemia	Protein_metabolism_disorders_NEC	Protein_and_amino_acid_metabolism_disorders_NEC	Metabolism_and_nutrition_disorders
Hyperammonemia	P16219	3933	Hyperammonaemia	Protein_metabolism_disorders_NEC	Protein_and_amino_acid_metabolism_disorders_NEC	Metabolism_and_nutrition_disorders
Hyperammonemia	Q16134	46069	Hyperammonaemia	Protein_metabolism_disorders_NEC	Protein_and_amino_acid_metabolism_disorders_NEC	Metabolism_and_nutrition_disorders
Hyperammonemia	Q13449	64948	Hyperammonaemia	Protein_metabolism_disorders_NEC	Protein_and_amino_acid_metabolism_disorders_NEC	Metabolism_and_nutrition_disorders
Hyperammonemia	O43826	61232	Hyperammonaemia	Protein_metabolism_disorders_NEC	Protein_and_amino_acid_metabolism_disorders_NEC	Metabolism_and_nutrition_disorders
Hyperammonemia	P61916	13409	Hyperammonaemia	Protein_metabolism_disorders_NEC	Protein_and_amino_acid_metabolism_disorders_NEC	Metabolism_and_nutrition_disorders
Hyperammonemia	P17050	66764	Hyperammonaemia	Protein_metabolism_disorders_NEC	Protein_and_amino_acid_metabolism_disorders_NEC	Metabolism_and_nutrition_disorders
Hyperammonemia	Q9UBK8	27660	Hyperammonaemia	Protein_metabolism_disorders_NEC	Protein_and_amino_acid_metabolism_disorders_NEC	Metabolism_and_nutrition_disorders
Hyperammonemia	Q14693	30115	Hyperammonaemia	Protein_metabolism_disorders_NEC	Protein_and_amino_acid_metabolism_disorders_NEC	Metabolism_and_nutrition_disorders
Hyperammonemia	Q9Y4U1	64985	Hyperammonaemia	Protein_metabolism_disorders_NEC	Protein_and_amino_acid_metabolism_disorders_NEC	Metabolism_and_nutrition_disorders
Hyperammonemia	Q9UQ16	40951	Hyperammonaemia	Protein_metabolism_disorders_NEC	Protein_and_amino_acid_metabolism_disorders_NEC	Metabolism_and_nutrition_disorders
Hyperammonemia	Q9H4F1	68934	Hyperammonaemia	Protein_metabolism_disorders_NEC	Protein_and_amino_acid_metabolism_disorders_NEC	Metabolism_and_nutrition_disorders
Hyperammonemia	Q9H3L0	24223	Hyperammonaemia	Protein_metabolism_disorders_NEC	Protein_and_amino_acid_metabolism_disorders_NEC	Metabolism_and_nutrition_disorders
Hyperammonemia	Q99707	26236	Hyperammonaemia	Protein_metabolism_disorders_NEC	Protein_and_amino_acid_metabolism_disorders_NEC	Metabolism_and_nutrition_disorders
Hyperammonemia	O00754	47798	Hyperammonaemia	Protein_metabolism_disorders_NEC	Protein_and_amino_acid_metabolism_disorders_NEC	Metabolism_and_nutrition_disorders
Hyperammonemia	O75526	61236	Hyperammonaemia	Protein_metabolism_disorders_NEC	Protein_and_amino_acid_metabolism_disorders_NEC	Metabolism_and_nutrition_disorders
Hyperammonemia	Q9UIG8	61539	Hyperammonaemia	Protein_metabolism_disorders_NEC	Protein_and_amino_acid_metabolism_disorders_NEC	Metabolism_and_nutrition_disorders
Hyperammonemia	Q8NBX0	16331	Hyperammonaemia	Protein_metabolism_disorders_NEC	Protein_and_amino_acid_metabolism_disorders_NEC	Metabolism_and_nutrition_disorders
Hyperammonemia	Q9NPF0	39234	Hyperammonaemia	Protein_metabolism_disorders_NEC	Protein_and_amino_acid_metabolism_disorders_NEC	Metabolism_and_nutrition_disorders
Hyperammonemia	Q9NYB5	18241	Hyperammonaemia	Protein_metabolism_disorders_NEC	Protein_and_amino_acid_metabolism_disorders_NEC	Metabolism_and_nutrition_disorders
Hyperammonemia	Q9BUB7	62654	Hyperammonaemia	Protein_metabolism_disorders_NEC	Protein_and_amino_acid_metabolism_disorders_NEC	Metabolism_and_nutrition_disorders
Hyperammonemia	Q9NWW5	19374	Hyperammonaemia	Protein_metabolism_disorders_NEC	Protein_and_amino_acid_metabolism_disorders_NEC	Metabolism_and_nutrition_disorders
Hyperammonemia	Q9GZU3	61156	Hyperammonaemia	Protein_metabolism_disorders_NEC	Protein_and_amino_acid_metabolism_disorders_NEC	Metabolism_and_nutrition_disorders
Hyperammonemia	Q9H813	63755	Hyperammonaemia	Protein_metabolism_disorders_NEC	Protein_and_amino_acid_metabolism_disorders_NEC	Metabolism_and_nutrition_disorders
Hyperammonemia	P46059	64623	Hyperammonaemia	Protein_metabolism_disorders_NEC	Protein_and_amino_acid_metabolism_disorders_NEC	Metabolism_and_nutrition_disorders
Hyperammonemia	Q9NUN5	7925	Hyperammonaemia	Protein_metabolism_disorders_NEC	Protein_and_amino_acid_metabolism_disorders_NEC	Metabolism_and_nutrition_disorders
Hyperammonemia	Q96RQ3	17898	Hyperammonaemia	Protein_metabolism_disorders_NEC	Protein_and_amino_acid_metabolism_disorders_NEC	Metabolism_and_nutrition_disorders
Hyperammonemia	Q9HDC9	14077	Hyperammonaemia	Protein_metabolism_disorders_NEC	Protein_and_amino_acid_metabolism_disorders_NEC	Metabolism_and_nutrition_disorders
Hyperammonemia	Q9BVK8	50842	Hyperammonaemia	Protein_metabolism_disorders_NEC	Protein_and_amino_acid_metabolism_disorders_NEC	Metabolism_and_nutrition_disorders
Hyperammonemia	P54802	12169	Hyperammonaemia	Protein_metabolism_disorders_NEC	Protein_and_amino_acid_metabolism_disorders_NEC	Metabolism_and_nutrition_disorders
Hyperammonemia	Q9UJS0	16499	Hyperammonaemia	Protein_metabolism_disorders_NEC	Protein_and_amino_acid_metabolism_disorders_NEC	Metabolism_and_nutrition_disorders
Hyperammonemia	Q9UDR5	2177	Hyperammonaemia	Protein_metabolism_disorders_NEC	Protein_and_amino_acid_metabolism_disorders_NEC	Metabolism_and_nutrition_disorders
Hyperammonemia	Q16348	50808	Hyperammonaemia	Protein_metabolism_disorders_NEC	Protein_and_amino_acid_metabolism_disorders_NEC	Metabolism_and_nutrition_disorders
Hyperammonemia	P11217	19601	Hyperammonaemia	Protein_metabolism_disorders_NEC	Protein_and_amino_acid_metabolism_disorders_NEC	Metabolism_and_nutrition_disorders
Hyperammonemia	P46721	63539	Hyperammonaemia	Protein_metabolism_disorders_NEC	Protein_and_amino_acid_metabolism_disorders_NEC	Metabolism_and_nutrition_disorders
Hyperammonemia	O75751	63986	Hyperammonaemia	Protein_metabolism_disorders_NEC	Protein_and_amino_acid_metabolism_disorders_NEC	Metabolism_and_nutrition_disorders
Hyperammonemia	P06737	65985	Hyperammonaemia	Protein_metabolism_disorders_NEC	Protein_and_amino_acid_metabolism_disorders_NEC	Metabolism_and_nutrition_disorders
Hyperammonemia	P54886	28655	Hyperammonaemia	Protein_metabolism_disorders_NEC	Protein_and_amino_acid_metabolism_disorders_NEC	Metabolism_and_nutrition_disorders
Hyperammonemia	P50897	19083	Hyperammonaemia	Protein_metabolism_disorders_NEC	Protein_and_amino_acid_metabolism_disorders_NEC	Metabolism_and_nutrition_disorders
Hyperammonemia	P08237	14670	Hyperammonaemia	Protein_metabolism_disorders_NEC	Protein_and_amino_acid_metabolism_disorders_NEC	Metabolism_and_nutrition_disorders
Hyperammonemia	Q9H015	64652	Hyperammonaemia	Protein_metabolism_disorders_NEC	Protein_and_amino_acid_metabolism_disorders_NEC	Metabolism_and_nutrition_disorders
Hyperammonemia	O76082	50767	Hyperammonaemia	Protein_metabolism_disorders_NEC	Protein_and_amino_acid_metabolism_disorders_NEC	Metabolism_and_nutrition_disorders
Hyperammonemia	P05166	17900	Hyperammonaemia	Protein_metabolism_disorders_NEC	Protein_and_amino_acid_metabolism_disorders_NEC	Metabolism_and_nutrition_disorders
Hyperammonemia	Q9GZU1	46565	Hyperammonaemia	Protein_metabolism_disorders_NEC	Protein_and_amino_acid_metabolism_disorders_NEC	Metabolism_and_nutrition_disorders
Hyperammonemia	P17405	18781	Hyperammonaemia	Protein_metabolism_disorders_NEC	Protein_and_amino_acid_metabolism_disorders_NEC	Metabolism_and_nutrition_disorders
Hyperammonemia	Q12889	45925	Hyperammonaemia	Protein_metabolism_disorders_NEC	Protein_and_amino_acid_metabolism_disorders_NEC	Metabolism_and_nutrition_disorders
Hyperammonemia	P04181	65259	Hyperammonaemia	Protein_metabolism_disorders_NEC	Protein_and_amino_acid_metabolism_disorders_NEC	Metabolism_and_nutrition_disorders
Hyperammonemia	Q16635	64426	Hyperammonaemia	Protein_metabolism_disorders_NEC	Protein_and_amino_acid_metabolism_disorders_NEC	Metabolism_and_nutrition_disorders
Hyperammonemia	P26440	63950	Hyperammonaemia	Protein_metabolism_disorders_NEC	Protein_and_amino_acid_metabolism_disorders_NEC	Metabolism_and_nutrition_disorders
Hyperammonemia	O15118	52650	Hyperammonaemia	Protein_metabolism_disorders_NEC	Protein_and_amino_acid_metabolism_disorders_NEC	Metabolism_and_nutrition_disorders
Hyperammonemia	P04818	26774	Hyperammonaemia	Protein_metabolism_disorders_NEC	Protein_and_amino_acid_metabolism_disorders_NEC	Metabolism_and_nutrition_disorders
Hyperammonemia	Q99519	5722	Hyperammonaemia	Protein_metabolism_disorders_NEC	Protein_and_amino_acid_metabolism_disorders_NEC	Metabolism_and_nutrition_disorders
Hyperammonemia	O95178	70083	Hyperammonaemia	Protein_metabolism_disorders_NEC	Protein_and_amino_acid_metabolism_disorders_NEC	Metabolism_and_nutrition_disorders
Hyperammonemia	P53597	25011	Hyperammonaemia	Protein_metabolism_disorders_NEC	Protein_and_amino_acid_metabolism_disorders_NEC	Metabolism_and_nutrition_disorders
Hyperammonemia	O15488	69208	Hyperammonaemia	Protein_metabolism_disorders_NEC	Protein_and_amino_acid_metabolism_disorders_NEC	Metabolism_and_nutrition_disorders
Hyperammonemia	Q9UM01	65519	Hyperammonaemia	Protein_metabolism_disorders_NEC	Protein_and_amino_acid_metabolism_disorders_NEC	Metabolism_and_nutrition_disorders
Hyperammonemia	P05165	7674	Hyperammonaemia	Protein_metabolism_disorders_NEC	Protein_and_amino_acid_metabolism_disorders_NEC	Metabolism_and_nutrition_disorders
Hyperammonemia	Q9HCC0	17834	Hyperammonaemia	Protein_metabolism_disorders_NEC	Protein_and_amino_acid_metabolism_disorders_NEC	Metabolism_and_nutrition_disorders
Hyperammonemia	Q9NV35	50472	Hyperammonaemia	Protein_metabolism_disorders_NEC	Protein_and_amino_acid_metabolism_disorders_NEC	Metabolism_and_nutrition_disorders
Hyperammonemia	Q8N5M1	22497	Hyperammonaemia	Protein_metabolism_disorders_NEC	Protein_and_amino_acid_metabolism_disorders_NEC	Metabolism_and_nutrition_disorders
Hyperammonemia	Q9H6K4	20842	Hyperammonaemia	Protein_metabolism_disorders_NEC	Protein_and_amino_acid_metabolism_disorders_NEC	Metabolism_and_nutrition_disorders
Hyperammonemia	P58215	67156	Hyperammonaemia	Protein_metabolism_disorders_NEC	Protein_and_amino_acid_metabolism_disorders_NEC	Metabolism_and_nutrition_disorders
Hyperammonemia	Q96PL5	28746	Hyperammonaemia	Protein_metabolism_disorders_NEC	Protein_and_amino_acid_metabolism_disorders_NEC	Metabolism_and_nutrition_disorders
Hyperammonemia	Q96EC8	45315	Hyperammonaemia	Protein_metabolism_disorders_NEC	Protein_and_amino_acid_metabolism_disorders_NEC	Metabolism_and_nutrition_disorders
Hyperammonemia	P35475	15554	Hyperammonaemia	Protein_metabolism_disorders_NEC	Protein_and_amino_acid_metabolism_disorders_NEC	Metabolism_and_nutrition_disorders
Hyperammonemia	Q12794	30342	Hyperammonaemia	Protein_metabolism_disorders_NEC	Protein_and_amino_acid_metabolism_disorders_NEC	Metabolism_and_nutrition_disorders
Hyperammonemia	P54868	62416	Hyperammonaemia	Protein_metabolism_disorders_NEC	Protein_and_amino_acid_metabolism_disorders_NEC	Metabolism_and_nutrition_disorders
Hyperammonemia	P35914	5448	Hyperammonaemia	Protein_metabolism_disorders_NEC	Protein_and_amino_acid_metabolism_disorders_NEC	Metabolism_and_nutrition_disorders
Hyperammonemia	P50747	28885	Hyperammonaemia	Protein_metabolism_disorders_NEC	Protein_and_amino_acid_metabolism_disorders_NEC	Metabolism_and_nutrition_disorders
Hyperammonemia	P53701	15672	Hyperammonaemia	Protein_metabolism_disorders_NEC	Protein_and_amino_acid_metabolism_disorders_NEC	Metabolism_and_nutrition_disorders
Hyperammonemia	P55084	12982	Hyperammonaemia	Protein_metabolism_disorders_NEC	Protein_and_amino_acid_metabolism_disorders_NEC	Metabolism_and_nutrition_disorders
Hyperammonemia	Q9H6X4	64329	Hyperammonaemia	Protein_metabolism_disorders_NEC	Protein_and_amino_acid_metabolism_disorders_NEC	Metabolism_and_nutrition_disorders
Hyperammonemia	P13807	33399	Hyperammonaemia	Protein_metabolism_disorders_NEC	Protein_and_amino_acid_metabolism_disorders_NEC	Metabolism_and_nutrition_disorders
Hyperammonemia	P25092	62655	Hyperammonaemia	Protein_metabolism_disorders_NEC	Protein_and_amino_acid_metabolism_disorders_NEC	Metabolism_and_nutrition_disorders
Hyperammonemia	Q13491	58367	Hyperammonaemia	Protein_metabolism_disorders_NEC	Protein_and_amino_acid_metabolism_disorders_NEC	Metabolism_and_nutrition_disorders
Hyperammonemia	P17900	19732	Hyperammonaemia	Protein_metabolism_disorders_NEC	Protein_and_amino_acid_metabolism_disorders_NEC	Metabolism_and_nutrition_disorders
Hyperammonemia	P00367	7611	Hyperammonaemia	Protein_metabolism_disorders_NEC	Protein_and_amino_acid_metabolism_disorders_NEC	Metabolism_and_nutrition_disorders
Hyperammonemia	P16278	25969	Hyperammonaemia	Protein_metabolism_disorders_NEC	Protein_and_amino_acid_metabolism_disorders_NEC	Metabolism_and_nutrition_disorders
Hyperammonemia	P06280	9094	Hyperammonaemia	Protein_metabolism_disorders_NEC	Protein_and_amino_acid_metabolism_disorders_NEC	Metabolism_and_nutrition_disorders
Hyperammonemia	P19440	48458	Hyperammonaemia	Protein_metabolism_disorders_NEC	Protein_and_amino_acid_metabolism_disorders_NEC	Metabolism_and_nutrition_disorders
Hyperammonemia	P35557	62107	Hyperammonaemia	Protein_metabolism_disorders_NEC	Protein_and_amino_acid_metabolism_disorders_NEC	Metabolism_and_nutrition_disorders
Hyperammonemia	Q04446	21136	Hyperammonaemia	Protein_metabolism_disorders_NEC	Protein_and_amino_acid_metabolism_disorders_NEC	Metabolism_and_nutrition_disorders
Hyperammonemia	P34059	63433	Hyperammonaemia	Protein_metabolism_disorders_NEC	Protein_and_amino_acid_metabolism_disorders_NEC	Metabolism_and_nutrition_disorders
Hyperammonemia	P10253	19277	Hyperammonaemia	Protein_metabolism_disorders_NEC	Protein_and_amino_acid_metabolism_disorders_NEC	Metabolism_and_nutrition_disorders
Hyperammonemia	P46976	20029	Hyperammonaemia	Protein_metabolism_disorders_NEC	Protein_and_amino_acid_metabolism_disorders_NEC	Metabolism_and_nutrition_disorders
Hyperammonemia	Q96K37	16357	Hyperammonaemia	Protein_metabolism_disorders_NEC	Protein_and_amino_acid_metabolism_disorders_NEC	Metabolism_and_nutrition_disorders
Hyperammonemia	P51688	52475	Hyperammonaemia	Protein_metabolism_disorders_NEC	Protein_and_amino_acid_metabolism_disorders_NEC	Metabolism_and_nutrition_disorders
Hyperammonemia	Q3T906	16526	Hyperammonaemia	Protein_metabolism_disorders_NEC	Protein_and_amino_acid_metabolism_disorders_NEC	Metabolism_and_nutrition_disorders
Hyperammonemia	Q86UT5	64299	Hyperammonaemia	Protein_metabolism_disorders_NEC	Protein_and_amino_acid_metabolism_disorders_NEC	Metabolism_and_nutrition_disorders
Hyperammonemia	Q8TB22	69581	Hyperammonaemia	Protein_metabolism_disorders_NEC	Protein_and_amino_acid_metabolism_disorders_NEC	Metabolism_and_nutrition_disorders
Hyperammonemia	Q9H8P0	19369	Hyperammonaemia	Protein_metabolism_disorders_NEC	Protein_and_amino_acid_metabolism_disorders_NEC	Metabolism_and_nutrition_disorders
Hypoalbuminaemia	P20333	62101	Hypoalbuminaemia	Protein_metabolism_disorders_NEC	Protein_and_amino_acid_metabolism_disorders_NEC	Metabolism_and_nutrition_disorders
Hypoalbuminaemia	P05231	17383	Hypoalbuminaemia	Protein_metabolism_disorders_NEC	Protein_and_amino_acid_metabolism_disorders_NEC	Metabolism_and_nutrition_disorders
Hypoalbuminaemia	P08887	17382	Hypoalbuminaemia	Protein_metabolism_disorders_NEC	Protein_and_amino_acid_metabolism_disorders_NEC	Metabolism_and_nutrition_disorders
Hypoalbuminaemia	P13725	64645	Hypoalbuminaemia	Protein_metabolism_disorders_NEC	Protein_and_amino_acid_metabolism_disorders_NEC	Metabolism_and_nutrition_disorders
Hypoalbuminaemia	P02768	10572	Hypoalbuminaemia	Protein_metabolism_disorders_NEC	Protein_and_amino_acid_metabolism_disorders_NEC	Metabolism_and_nutrition_disorders
Non-alcoholic_steatohepatitis	Q9NSA1	69534	Non-alcoholic_steatohepatitis	Hepatocellular_damage_and_hepatitis_NEC	Hepatic_and_hepatobiliary_disorders	Hepatobiliary_disorders
Non-alcoholic_steatohepatitis	P32298	14692	Non-alcoholic_steatohepatitis	Hepatocellular_damage_and_hepatitis_NEC	Hepatic_and_hepatobiliary_disorders	Hepatobiliary_disorders
Non-alcoholic_steatohepatitis	P08263	12484	Non-alcoholic_steatohepatitis	Hepatocellular_damage_and_hepatitis_NEC	Hepatic_and_hepatobiliary_disorders	Hepatobiliary_disorders
Non-alcoholic_steatohepatitis	P05181	48284	Non-alcoholic_steatohepatitis	Hepatocellular_damage_and_hepatitis_NEC	Hepatic_and_hepatobiliary_disorders	Hepatobiliary_disorders
Non-alcoholic_steatohepatitis	Q11201	68886	Non-alcoholic_steatohepatitis	Hepatocellular_damage_and_hepatitis_NEC	Hepatic_and_hepatobiliary_disorders	Hepatobiliary_disorders
Non-alcoholic_steatohepatitis	O75078	8050	Non-alcoholic_steatohepatitis	Hepatocellular_damage_and_hepatitis_NEC	Hepatic_and_hepatobiliary_disorders	Hepatobiliary_disorders
Non-alcoholic_steatohepatitis	P42702	16067	Non-alcoholic_steatohepatitis	Hepatocellular_damage_and_hepatitis_NEC	Hepatic_and_hepatobiliary_disorders	Hepatobiliary_disorders
Non-alcoholic_steatohepatitis	P08700	64012	Non-alcoholic_steatohepatitis	Hepatocellular_damage_and_hepatitis_NEC	Hepatic_and_hepatobiliary_disorders	Hepatobiliary_disorders
Non-alcoholic_steatohepatitis	P15018	63545	Non-alcoholic_steatohepatitis	Hepatocellular_damage_and_hepatitis_NEC	Hepatic_and_hepatobiliary_disorders	Hepatobiliary_disorders
Non-alcoholic_steatohepatitis	P05113	63066	Non-alcoholic_steatohepatitis	Hepatocellular_damage_and_hepatitis_NEC	Hepatic_and_hepatobiliary_disorders	Hepatobiliary_disorders
Non-alcoholic_steatohepatitis	Q86V59	76284	Non-alcoholic_steatohepatitis	Hepatocellular_damage_and_hepatitis_NEC	Hepatic_and_hepatobiliary_disorders	Hepatobiliary_disorders
Non-alcoholic_steatohepatitis	O60674	13566	Non-alcoholic_steatohepatitis	Hepatocellular_damage_and_hepatitis_NEC	Hepatic_and_hepatobiliary_disorders	Hepatobiliary_disorders
Non-alcoholic_steatohepatitis	Q9BXB5	17724	Non-alcoholic_steatohepatitis	Hepatocellular_damage_and_hepatitis_NEC	Hepatic_and_hepatobiliary_disorders	Hepatobiliary_disorders
Non-alcoholic_steatohepatitis	P25391	26979	Non-alcoholic_steatohepatitis	Hepatocellular_damage_and_hepatitis_NEC	Hepatic_and_hepatobiliary_disorders	Hepatobiliary_disorders
Non-alcoholic_steatohepatitis	Q9P2W7	23608	Non-alcoholic_steatohepatitis	Hepatocellular_damage_and_hepatitis_NEC	Hepatic_and_hepatobiliary_disorders	Hepatobiliary_disorders
Non-alcoholic_steatohepatitis	P12821	4912	Non-alcoholic_steatohepatitis	Hepatocellular_damage_and_hepatitis_NEC	Hepatic_and_hepatobiliary_disorders	Hepatobiliary_disorders
Non-alcoholic_steatohepatitis	Q96EB6	13741	Non-alcoholic_steatohepatitis	Hepatocellular_damage_and_hepatitis_NEC	Hepatic_and_hepatobiliary_disorders	Hepatobiliary_disorders
Non-alcoholic_steatohepatitis	P30990	68411	Non-alcoholic_steatohepatitis	Hepatocellular_damage_and_hepatitis_NEC	Hepatic_and_hepatobiliary_disorders	Hepatobiliary_disorders
Non-alcoholic_steatohepatitis	Q8WTV0	14101	Non-alcoholic_steatohepatitis	Hepatocellular_damage_and_hepatitis_NEC	Hepatic_and_hepatobiliary_disorders	Hepatobiliary_disorders
Non-alcoholic_steatohepatitis	P36956	13974	Non-alcoholic_steatohepatitis	Hepatocellular_damage_and_hepatitis_NEC	Hepatic_and_hepatobiliary_disorders	Hepatobiliary_disorders
Non-alcoholic_steatohepatitis	P17861	17283	Non-alcoholic_steatohepatitis	Hepatocellular_damage_and_hepatitis_NEC	Hepatic_and_hepatobiliary_disorders	Hepatobiliary_disorders
Non-alcoholic_steatohepatitis	Q9ULB5	32850	Non-alcoholic_steatohepatitis	Hepatocellular_damage_and_hepatitis_NEC	Hepatic_and_hepatobiliary_disorders	Hepatobiliary_disorders
Non-alcoholic_steatohepatitis	Q9Y6K9	12443	Non-alcoholic_steatohepatitis	Hepatocellular_damage_and_hepatitis_NEC	Hepatic_and_hepatobiliary_disorders	Hepatobiliary_disorders
Non-alcoholic_steatohepatitis	Q16878	39767	Non-alcoholic_steatohepatitis	Hepatocellular_damage_and_hepatitis_NEC	Hepatic_and_hepatobiliary_disorders	Hepatobiliary_disorders
Non-alcoholic_steatohepatitis	P01130	29135	Non-alcoholic_steatohepatitis	Hepatocellular_damage_and_hepatitis_NEC	Hepatic_and_hepatobiliary_disorders	Hepatobiliary_disorders
Non-alcoholic_steatohepatitis	P14222	46550	Non-alcoholic_steatohepatitis	Hepatocellular_damage_and_hepatitis_NEC	Hepatic_and_hepatobiliary_disorders	Hepatobiliary_disorders
Non-alcoholic_steatohepatitis	Q03181	13902	Non-alcoholic_steatohepatitis	Hepatocellular_damage_and_hepatitis_NEC	Hepatic_and_hepatobiliary_disorders	Hepatobiliary_disorders
Non-alcoholic_steatohepatitis	P21439	68100	Non-alcoholic_steatohepatitis	Hepatocellular_damage_and_hepatitis_NEC	Hepatic_and_hepatobiliary_disorders	Hepatobiliary_disorders
Non-alcoholic_steatohepatitis	P04141	49550	Non-alcoholic_steatohepatitis	Hepatocellular_damage_and_hepatitis_NEC	Hepatic_and_hepatobiliary_disorders	Hepatobiliary_disorders
Non-alcoholic_steatohepatitis	P32927	69196	Non-alcoholic_steatohepatitis	Hepatocellular_damage_and_hepatitis_NEC	Hepatic_and_hepatobiliary_disorders	Hepatobiliary_disorders
Non-alcoholic_steatohepatitis	O76061	35618	Non-alcoholic_steatohepatitis	Hepatocellular_damage_and_hepatitis_NEC	Hepatic_and_hepatobiliary_disorders	Hepatobiliary_disorders
Non-alcoholic_steatohepatitis	Q99062	49555	Non-alcoholic_steatohepatitis	Hepatocellular_damage_and_hepatitis_NEC	Hepatic_and_hepatobiliary_disorders	Hepatobiliary_disorders
Non-alcoholic_steatohepatitis	P05093	48093	Non-alcoholic_steatohepatitis	Hepatocellular_damage_and_hepatitis_NEC	Hepatic_and_hepatobiliary_disorders	Hepatobiliary_disorders
Non-alcoholic_steatohepatitis	P05120	67690	Non-alcoholic_steatohepatitis	Hepatocellular_damage_and_hepatitis_NEC	Hepatic_and_hepatobiliary_disorders	Hepatobiliary_disorders
Non-alcoholic_steatohepatitis	P55895	60450	Non-alcoholic_steatohepatitis	Hepatocellular_damage_and_hepatitis_NEC	Hepatic_and_hepatobiliary_disorders	Hepatobiliary_disorders
Non-alcoholic_steatohepatitis	Q02045	65772	Non-alcoholic_steatohepatitis	Hepatocellular_damage_and_hepatitis_NEC	Hepatic_and_hepatobiliary_disorders	Hepatobiliary_disorders
Non-alcoholic_steatohepatitis	P41159	60489	Non-alcoholic_steatohepatitis	Hepatocellular_damage_and_hepatitis_NEC	Hepatic_and_hepatobiliary_disorders	Hepatobiliary_disorders
Non-alcoholic_steatohepatitis	Q07869	19279	Non-alcoholic_steatohepatitis	Hepatocellular_damage_and_hepatitis_NEC	Hepatic_and_hepatobiliary_disorders	Hepatobiliary_disorders
Non-alcoholic_steatohepatitis	Q15848	8497	Non-alcoholic_steatohepatitis	Hepatocellular_damage_and_hepatitis_NEC	Hepatic_and_hepatobiliary_disorders	Hepatobiliary_disorders
Non-alcoholic_steatohepatitis	P08571	30546	Non-alcoholic_steatohepatitis	Hepatocellular_damage_and_hepatitis_NEC	Hepatic_and_hepatobiliary_disorders	Hepatobiliary_disorders
Non-alcoholic_steatohepatitis	P01583	63891	Non-alcoholic_steatohepatitis	Hepatocellular_damage_and_hepatitis_NEC	Hepatic_and_hepatobiliary_disorders	Hepatobiliary_disorders
Non-alcoholic_steatohepatitis	P05112	62468	Non-alcoholic_steatohepatitis	Hepatocellular_damage_and_hepatitis_NEC	Hepatic_and_hepatobiliary_disorders	Hepatobiliary_disorders
Non-alcoholic_steatohepatitis	P09238	64675	Non-alcoholic_steatohepatitis	Hepatocellular_damage_and_hepatitis_NEC	Hepatic_and_hepatobiliary_disorders	Hepatobiliary_disorders
Non-alcoholic_steatohepatitis	Q16236	48549	Non-alcoholic_steatohepatitis	Hepatocellular_damage_and_hepatitis_NEC	Hepatic_and_hepatobiliary_disorders	Hepatobiliary_disorders
Non-alcoholic_steatohepatitis	P09455	66821	Non-alcoholic_steatohepatitis	Hepatocellular_damage_and_hepatitis_NEC	Hepatic_and_hepatobiliary_disorders	Hepatobiliary_disorders
Non-alcoholic_steatohepatitis	P25445	15686	Non-alcoholic_steatohepatitis	Hepatocellular_damage_and_hepatitis_NEC	Hepatic_and_hepatobiliary_disorders	Hepatobiliary_disorders
Non-alcoholic_steatohepatitis	O00602	67862	Non-alcoholic_steatohepatitis	Hepatocellular_damage_and_hepatitis_NEC	Hepatic_and_hepatobiliary_disorders	Hepatobiliary_disorders
Non-alcoholic_steatohepatitis	P80162	51236	Non-alcoholic_steatohepatitis	Hepatocellular_damage_and_hepatitis_NEC	Hepatic_and_hepatobiliary_disorders	Hepatobiliary_disorders
Non-alcoholic_steatohepatitis	Q9NST1	63146	Non-alcoholic_steatohepatitis	Hepatocellular_damage_and_hepatitis_NEC	Hepatic_and_hepatobiliary_disorders	Hepatobiliary_disorders
Non-alcoholic_steatohepatitis	P14780	12999	Non-alcoholic_steatohepatitis	Hepatocellular_damage_and_hepatitis_NEC	Hepatic_and_hepatobiliary_disorders	Hepatobiliary_disorders
Non-alcoholic_steatohepatitis	P35442	67276	Non-alcoholic_steatohepatitis	Hepatocellular_damage_and_hepatitis_NEC	Hepatic_and_hepatobiliary_disorders	Hepatobiliary_disorders
Non-alcoholic_steatohepatitis	P16035	27355	Non-alcoholic_steatohepatitis	Hepatocellular_damage_and_hepatitis_NEC	Hepatic_and_hepatobiliary_disorders	Hepatobiliary_disorders
Non-alcoholic_steatohepatitis	Q96GW7	45368	Non-alcoholic_steatohepatitis	Hepatocellular_damage_and_hepatitis_NEC	Hepatic_and_hepatobiliary_disorders	Hepatobiliary_disorders
Non-alcoholic_steatohepatitis	Q96RI1	46856	Non-alcoholic_steatohepatitis	Hepatocellular_damage_and_hepatitis_NEC	Hepatic_and_hepatobiliary_disorders	Hepatobiliary_disorders
Non-alcoholic_steatohepatitis	P01137	5665	Non-alcoholic_steatohepatitis	Hepatocellular_damage_and_hepatitis_NEC	Hepatic_and_hepatobiliary_disorders	Hepatobiliary_disorders
Non-alcoholic_steatohepatitis	P20333	62101	Non-alcoholic_steatohepatitis	Hepatocellular_damage_and_hepatitis_NEC	Hepatic_and_hepatobiliary_disorders	Hepatobiliary_disorders
Non-alcoholic_steatohepatitis	P00734	45326	Non-alcoholic_steatohepatitis	Hepatocellular_damage_and_hepatitis_NEC	Hepatic_and_hepatobiliary_disorders	Hepatobiliary_disorders
Non-alcoholic_steatohepatitis	P45452	68912	Non-alcoholic_steatohepatitis	Hepatocellular_damage_and_hepatitis_NEC	Hepatic_and_hepatobiliary_disorders	Hepatobiliary_disorders
Non-alcoholic_steatohepatitis	P30711	63689	Non-alcoholic_steatohepatitis	Hepatocellular_damage_and_hepatitis_NEC	Hepatic_and_hepatobiliary_disorders	Hepatobiliary_disorders
Non-alcoholic_steatohepatitis	P09488	64511	Non-alcoholic_steatohepatitis	Hepatocellular_damage_and_hepatitis_NEC	Hepatic_and_hepatobiliary_disorders	Hepatobiliary_disorders
Non-alcoholic_steatohepatitis	P03956	64181	Non-alcoholic_steatohepatitis	Hepatocellular_damage_and_hepatitis_NEC	Hepatic_and_hepatobiliary_disorders	Hepatobiliary_disorders
Non-alcoholic_steatohepatitis	P09211	5836	Non-alcoholic_steatohepatitis	Hepatocellular_damage_and_hepatitis_NEC	Hepatic_and_hepatobiliary_disorders	Hepatobiliary_disorders
Steatohepatitis	P50440	52048	Steatohepatitis	Hepatocellular_damage_and_hepatitis_NEC	Hepatic_and_hepatobiliary_disorders	Hepatobiliary_disorders
Steatohepatitis	P11168	66080	Steatohepatitis	Hepatocellular_damage_and_hepatitis_NEC	Hepatic_and_hepatobiliary_disorders	Hepatobiliary_disorders
Steatohepatitis	P06454	11936	Steatohepatitis	Hepatocellular_damage_and_hepatitis_NEC	Hepatic_and_hepatobiliary_disorders	Hepatobiliary_disorders
Steatohepatitis	P60484	21387	Steatohepatitis	Hepatocellular_damage_and_hepatitis_NEC	Hepatic_and_hepatobiliary_disorders	Hepatobiliary_disorders
Steatohepatitis	P28066	16180	Steatohepatitis	Hepatocellular_damage_and_hepatitis_NEC	Hepatic_and_hepatobiliary_disorders	Hepatobiliary_disorders
Steatohepatitis	P07359	68892	Steatohepatitis	Hepatocellular_damage_and_hepatitis_NEC	Hepatic_and_hepatobiliary_disorders	Hepatobiliary_disorders
Steatohepatitis	P07203	50672	Steatohepatitis	Hepatocellular_damage_and_hepatitis_NEC	Hepatic_and_hepatobiliary_disorders	Hepatobiliary_disorders
Steatohepatitis	P24723	14733	Steatohepatitis	Hepatocellular_damage_and_hepatitis_NEC	Hepatic_and_hepatobiliary_disorders	Hepatobiliary_disorders
Steatohepatitis	Q9ULL4	69606	Steatohepatitis	Hepatocellular_damage_and_hepatitis_NEC	Hepatic_and_hepatobiliary_disorders	Hepatobiliary_disorders
Steatohepatitis	P05121	50699	Steatohepatitis	Hepatocellular_damage_and_hepatitis_NEC	Hepatic_and_hepatobiliary_disorders	Hepatobiliary_disorders
Steatohepatitis	Q96HA7	62629	Steatohepatitis	Hepatocellular_damage_and_hepatitis_NEC	Hepatic_and_hepatobiliary_disorders	Hepatobiliary_disorders
Steatohepatitis	P36969	60926	Steatohepatitis	Hepatocellular_damage_and_hepatitis_NEC	Hepatic_and_hepatobiliary_disorders	Hepatobiliary_disorders
Steatohepatitis	P25025	13496	Steatohepatitis	Hepatocellular_damage_and_hepatitis_NEC	Hepatic_and_hepatobiliary_disorders	Hepatobiliary_disorders
Steatohepatitis	P19876	51228	Steatohepatitis	Hepatocellular_damage_and_hepatitis_NEC	Hepatic_and_hepatobiliary_disorders	Hepatobiliary_disorders
Steatohepatitis	P01106	14037	Steatohepatitis	Hepatocellular_damage_and_hepatitis_NEC	Hepatic_and_hepatobiliary_disorders	Hepatobiliary_disorders
Steatohepatitis	P55157	66138	Steatohepatitis	Hepatocellular_damage_and_hepatitis_NEC	Hepatic_and_hepatobiliary_disorders	Hepatobiliary_disorders
Steatohepatitis	Q03014	50815	Steatohepatitis	Hepatocellular_damage_and_hepatitis_NEC	Hepatic_and_hepatobiliary_disorders	Hepatobiliary_disorders
Steatohepatitis	P52790	63050	Steatohepatitis	Hepatocellular_damage_and_hepatitis_NEC	Hepatic_and_hepatobiliary_disorders	Hepatobiliary_disorders
Steatohepatitis	Q00266	66240	Steatohepatitis	Hepatocellular_damage_and_hepatitis_NEC	Hepatic_and_hepatobiliary_disorders	Hepatobiliary_disorders
Steatohepatitis	O15525	14560	Steatohepatitis	Hepatocellular_damage_and_hepatitis_NEC	Hepatic_and_hepatobiliary_disorders	Hepatobiliary_disorders
Steatohepatitis	Q16534	5747	Steatohepatitis	Hepatocellular_damage_and_hepatitis_NEC	Hepatic_and_hepatobiliary_disorders	Hepatobiliary_disorders
Steatohepatitis	O00206	12741	Steatohepatitis	Hepatocellular_damage_and_hepatitis_NEC	Hepatic_and_hepatobiliary_disorders	Hepatobiliary_disorders
Steatohepatitis	P55317	69450	Steatohepatitis	Hepatocellular_damage_and_hepatitis_NEC	Hepatic_and_hepatobiliary_disorders	Hepatobiliary_disorders
Steatohepatitis	P20719	20824	Steatohepatitis	Hepatocellular_damage_and_hepatitis_NEC	Hepatic_and_hepatobiliary_disorders	Hepatobiliary_disorders
Steatohepatitis	P17181	66542	Steatohepatitis	Hepatocellular_damage_and_hepatitis_NEC	Hepatic_and_hepatobiliary_disorders	Hepatobiliary_disorders
Steatohepatitis	P10145	13477	Steatohepatitis	Hepatocellular_damage_and_hepatitis_NEC	Hepatic_and_hepatobiliary_disorders	Hepatobiliary_disorders
Steatohepatitis	P25024	51244	Steatohepatitis	Hepatocellular_damage_and_hepatitis_NEC	Hepatic_and_hepatobiliary_disorders	Hepatobiliary_disorders
Steatohepatitis	P48357	36155	Steatohepatitis	Hepatocellular_damage_and_hepatitis_NEC	Hepatic_and_hepatobiliary_disorders	Hepatobiliary_disorders
Steatohepatitis	P55851	69932	Steatohepatitis	Hepatocellular_damage_and_hepatitis_NEC	Hepatic_and_hepatobiliary_disorders	Hepatobiliary_disorders
Steatohepatitis	P02461	6730	Steatohepatitis	Hepatocellular_damage_and_hepatitis_NEC	Hepatic_and_hepatobiliary_disorders	Hepatobiliary_disorders
Steatohepatitis	Q15466	67152	Steatohepatitis	Hepatocellular_damage_and_hepatitis_NEC	Hepatic_and_hepatobiliary_disorders	Hepatobiliary_disorders
Steatohepatitis	O60760	24144	Steatohepatitis	Hepatocellular_damage_and_hepatitis_NEC	Hepatic_and_hepatobiliary_disorders	Hepatobiliary_disorders
Steatohepatitis	Q96GK7	64354	Steatohepatitis	Hepatocellular_damage_and_hepatitis_NEC	Hepatic_and_hepatobiliary_disorders	Hepatobiliary_disorders
Steatohepatitis	Q8WTS1	3449	Steatohepatitis	Hepatocellular_damage_and_hepatitis_NEC	Hepatic_and_hepatobiliary_disorders	Hepatobiliary_disorders
Steatohepatitis	Q9BY76	12248	Steatohepatitis	Hepatocellular_damage_and_hepatitis_NEC	Hepatic_and_hepatobiliary_disorders	Hepatobiliary_disorders
Steatohepatitis	Q9NRC8	29321	Steatohepatitis	Hepatocellular_damage_and_hepatitis_NEC	Hepatic_and_hepatobiliary_disorders	Hepatobiliary_disorders
Steatohepatitis	P99999	48417	Steatohepatitis	Hepatocellular_damage_and_hepatitis_NEC	Hepatic_and_hepatobiliary_disorders	Hepatobiliary_disorders
Steatohepatitis	Q9UQV4	63980	Steatohepatitis	Hepatocellular_damage_and_hepatitis_NEC	Hepatic_and_hepatobiliary_disorders	Hepatobiliary_disorders
Steatohepatitis	Q9NWF9	28824	Steatohepatitis	Hepatocellular_damage_and_hepatitis_NEC	Hepatic_and_hepatobiliary_disorders	Hepatobiliary_disorders
Steatohepatitis	Q9NR55	17278	Steatohepatitis	Hepatocellular_damage_and_hepatitis_NEC	Hepatic_and_hepatobiliary_disorders	Hepatobiliary_disorders
Steatohepatitis	Q8WZA1	50799	Steatohepatitis	Hepatocellular_damage_and_hepatitis_NEC	Hepatic_and_hepatobiliary_disorders	Hepatobiliary_disorders
Steatohepatitis	Q96KP4	45481	Steatohepatitis	Hepatocellular_damage_and_hepatitis_NEC	Hepatic_and_hepatobiliary_disorders	Hepatobiliary_disorders
Steatohepatitis	Q9BYF1	4848	Steatohepatitis	Hepatocellular_damage_and_hepatitis_NEC	Hepatic_and_hepatobiliary_disorders	Hepatobiliary_disorders
Steatohepatitis	Q96LW9	42062	Steatohepatitis	Hepatocellular_damage_and_hepatitis_NEC	Hepatic_and_hepatobiliary_disorders	Hepatobiliary_disorders
Steatohepatitis	Q96FI4	49826	Steatohepatitis	Hepatocellular_damage_and_hepatitis_NEC	Hepatic_and_hepatobiliary_disorders	Hepatobiliary_disorders
Steatohepatitis	Q9NX61	15845	Steatohepatitis	Hepatocellular_damage_and_hepatitis_NEC	Hepatic_and_hepatobiliary_disorders	Hepatobiliary_disorders
Steatohepatitis	Q6UXD5	65819	Steatohepatitis	Hepatocellular_damage_and_hepatitis_NEC	Hepatic_and_hepatobiliary_disorders	Hepatobiliary_disorders
Steatohepatitis	Q9Y6Y9	63342	Steatohepatitis	Hepatocellular_damage_and_hepatitis_NEC	Hepatic_and_hepatobiliary_disorders	Hepatobiliary_disorders
Steatohepatitis	O94760	54696	Steatohepatitis	Hepatocellular_damage_and_hepatitis_NEC	Hepatic_and_hepatobiliary_disorders	Hepatobiliary_disorders
Steatohepatitis	Q96JQ0	7672	Steatohepatitis	Hepatocellular_damage_and_hepatitis_NEC	Hepatic_and_hepatobiliary_disorders	Hepatobiliary_disorders
Steatohepatitis	O43508	21017	Steatohepatitis	Hepatocellular_damage_and_hepatitis_NEC	Hepatic_and_hepatobiliary_disorders	Hepatobiliary_disorders
Steatohepatitis	O60883	63936	Steatohepatitis	Hepatocellular_damage_and_hepatitis_NEC	Hepatic_and_hepatobiliary_disorders	Hepatobiliary_disorders
Steatohepatitis	O75899	36011	Steatohepatitis	Hepatocellular_damage_and_hepatitis_NEC	Hepatic_and_hepatobiliary_disorders	Hepatobiliary_disorders
Steatohepatitis	Q9UBS5	52267	Steatohepatitis	Hepatocellular_damage_and_hepatitis_NEC	Hepatic_and_hepatobiliary_disorders	Hepatobiliary_disorders
Steatohepatitis	Q92563	6156	Steatohepatitis	Hepatocellular_damage_and_hepatitis_NEC	Hepatic_and_hepatobiliary_disorders	Hepatobiliary_disorders
Steatohepatitis	Q86UL8	66480	Steatohepatitis	Hepatocellular_damage_and_hepatitis_NEC	Hepatic_and_hepatobiliary_disorders	Hepatobiliary_disorders
Steatohepatitis	P98153	62571	Steatohepatitis	Hepatocellular_damage_and_hepatitis_NEC	Hepatic_and_hepatobiliary_disorders	Hepatobiliary_disorders
Steatohepatitis	O60487	64105	Steatohepatitis	Hepatocellular_damage_and_hepatitis_NEC	Hepatic_and_hepatobiliary_disorders	Hepatobiliary_disorders
Steatohepatitis	Q96RU8	27462	Steatohepatitis	Hepatocellular_damage_and_hepatitis_NEC	Hepatic_and_hepatobiliary_disorders	Hepatobiliary_disorders
Steatohepatitis	Q9BQ50	63584	Steatohepatitis	Hepatocellular_damage_and_hepatitis_NEC	Hepatic_and_hepatobiliary_disorders	Hepatobiliary_disorders
Steatohepatitis	O94952	24749	Steatohepatitis	Hepatocellular_damage_and_hepatitis_NEC	Hepatic_and_hepatobiliary_disorders	Hepatobiliary_disorders
Steatohepatitis	O60307	31604	Steatohepatitis	Hepatocellular_damage_and_hepatitis_NEC	Hepatic_and_hepatobiliary_disorders	Hepatobiliary_disorders
Steatohepatitis	Q8N335	63882	Steatohepatitis	Hepatocellular_damage_and_hepatitis_NEC	Hepatic_and_hepatobiliary_disorders	Hepatobiliary_disorders
Steatohepatitis	Q86VP3	20670	Steatohepatitis	Hepatocellular_damage_and_hepatitis_NEC	Hepatic_and_hepatobiliary_disorders	Hepatobiliary_disorders
Steatohepatitis	O60675	25588	Steatohepatitis	Hepatocellular_damage_and_hepatitis_NEC	Hepatic_and_hepatobiliary_disorders	Hepatobiliary_disorders
Steatohepatitis	Q16570	5118	Steatohepatitis	Hepatocellular_damage_and_hepatitis_NEC	Hepatic_and_hepatobiliary_disorders	Hepatobiliary_disorders
Steatohepatitis	P18848	17294	Steatohepatitis	Hepatocellular_damage_and_hepatitis_NEC	Hepatic_and_hepatobiliary_disorders	Hepatobiliary_disorders
Steatohepatitis	Q04743	46548	Steatohepatitis	Hepatocellular_damage_and_hepatitis_NEC	Hepatic_and_hepatobiliary_disorders	Hepatobiliary_disorders
Steatohepatitis	P01130	29135	Steatohepatitis	Hepatocellular_damage_and_hepatitis_NEC	Hepatic_and_hepatobiliary_disorders	Hepatobiliary_disorders
Steatohepatitis	Q16612	35949	Steatohepatitis	Hepatocellular_damage_and_hepatitis_NEC	Hepatic_and_hepatobiliary_disorders	Hepatobiliary_disorders
Steatohepatitis	O75469	14103	Steatohepatitis	Hepatocellular_damage_and_hepatitis_NEC	Hepatic_and_hepatobiliary_disorders	Hepatobiliary_disorders
Steatohepatitis	Q9NV35	50472	Steatohepatitis	Hepatocellular_damage_and_hepatitis_NEC	Hepatic_and_hepatobiliary_disorders	Hepatobiliary_disorders
Steatohepatitis	P02787	35640	Steatohepatitis	Hepatocellular_damage_and_hepatitis_NEC	Hepatic_and_hepatobiliary_disorders	Hepatobiliary_disorders
Steatohepatitis	P04179	5076	Steatohepatitis	Hepatocellular_damage_and_hepatitis_NEC	Hepatic_and_hepatobiliary_disorders	Hepatobiliary_disorders
Steatohepatitis	Q9NST1	63146	Steatohepatitis	Hepatocellular_damage_and_hepatitis_NEC	Hepatic_and_hepatobiliary_disorders	Hepatobiliary_disorders
Steatohepatitis	Q8WVN6	62013	Steatohepatitis	Hepatocellular_damage_and_hepatitis_NEC	Hepatic_and_hepatobiliary_disorders	Hepatobiliary_disorders
Steatohepatitis	Q9ULB5	32850	Steatohepatitis	Hepatocellular_damage_and_hepatitis_NEC	Hepatic_and_hepatobiliary_disorders	Hepatobiliary_disorders
Steatohepatitis	P10082	68038	Steatohepatitis	Hepatocellular_damage_and_hepatitis_NEC	Hepatic_and_hepatobiliary_disorders	Hepatobiliary_disorders
Steatohepatitis	Q16236	48549	Steatohepatitis	Hepatocellular_damage_and_hepatitis_NEC	Hepatic_and_hepatobiliary_disorders	Hepatobiliary_disorders
Steatohepatitis	Q9NZR2	52392	Steatohepatitis	Hepatocellular_damage_and_hepatitis_NEC	Hepatic_and_hepatobiliary_disorders	Hepatobiliary_disorders
Steatohepatitis	P01574	65211	Steatohepatitis	Hepatocellular_damage_and_hepatitis_NEC	Hepatic_and_hepatobiliary_disorders	Hepatobiliary_disorders
Steatohepatitis	P48551	7353	Steatohepatitis	Hepatocellular_damage_and_hepatitis_NEC	Hepatic_and_hepatobiliary_disorders	Hepatobiliary_disorders
Steatohepatitis	P01375	12447	Steatohepatitis	Hepatocellular_damage_and_hepatitis_NEC	Hepatic_and_hepatobiliary_disorders	Hepatobiliary_disorders
Steatohepatitis	P32881	67231	Steatohepatitis	Hepatocellular_damage_and_hepatitis_NEC	Hepatic_and_hepatobiliary_disorders	Hepatobiliary_disorders
Steatohepatitis	P01569	63712	Steatohepatitis	Hepatocellular_damage_and_hepatitis_NEC	Hepatic_and_hepatobiliary_disorders	Hepatobiliary_disorders
Steatohepatitis	P01308	12914	Steatohepatitis	Hepatocellular_damage_and_hepatitis_NEC	Hepatic_and_hepatobiliary_disorders	Hepatobiliary_disorders
Steatohepatitis	P01563	62530	Steatohepatitis	Hepatocellular_damage_and_hepatitis_NEC	Hepatic_and_hepatobiliary_disorders	Hepatobiliary_disorders
Steatohepatitis	P05181	48284	Steatohepatitis	Hepatocellular_damage_and_hepatitis_NEC	Hepatic_and_hepatobiliary_disorders	Hepatobiliary_disorders
Steatohepatitis	P25116	7668	Steatohepatitis	Hepatocellular_damage_and_hepatitis_NEC	Hepatic_and_hepatobiliary_disorders	Hepatobiliary_disorders
Steatohepatitis	Q07869	19279	Steatohepatitis	Hepatocellular_damage_and_hepatitis_NEC	Hepatic_and_hepatobiliary_disorders	Hepatobiliary_disorders
Steatohepatitis	P00441	5081	Steatohepatitis	Hepatocellular_damage_and_hepatitis_NEC	Hepatic_and_hepatobiliary_disorders	Hepatobiliary_disorders
Steatohepatitis	Q8WWZ7	2930	Steatohepatitis	Hepatocellular_damage_and_hepatitis_NEC	Hepatic_and_hepatobiliary_disorders	Hepatobiliary_disorders
Steatohepatitis	P01562	63561	Steatohepatitis	Hepatocellular_damage_and_hepatitis_NEC	Hepatic_and_hepatobiliary_disorders	Hepatobiliary_disorders
Steatohepatitis	P05089	16188	Steatohepatitis	Hepatocellular_damage_and_hepatitis_NEC	Hepatic_and_hepatobiliary_disorders	Hepatobiliary_disorders
Steatohepatitis	P04040	6316	Steatohepatitis	Hepatocellular_damage_and_hepatitis_NEC	Hepatic_and_hepatobiliary_disorders	Hepatobiliary_disorders
Steatohepatitis	P23946	45103	Steatohepatitis	Hepatocellular_damage_and_hepatitis_NEC	Hepatic_and_hepatobiliary_disorders	Hepatobiliary_disorders
Steatohepatitis	P24298	10535	Steatohepatitis	Hepatocellular_damage_and_hepatitis_NEC	Hepatic_and_hepatobiliary_disorders	Hepatobiliary_disorders
Steatohepatitis	Q96RI1	46856	Steatohepatitis	Hepatocellular_damage_and_hepatitis_NEC	Hepatic_and_hepatobiliary_disorders	Hepatobiliary_disorders
Steatohepatitis	P41159	60489	Steatohepatitis	Hepatocellular_damage_and_hepatitis_NEC	Hepatic_and_hepatobiliary_disorders	Hepatobiliary_disorders
Steatohepatitis	Q13133	14702	Steatohepatitis	Hepatocellular_damage_and_hepatitis_NEC	Hepatic_and_hepatobiliary_disorders	Hepatobiliary_disorders
Steatohepatitis	Q9Y6Z7	47117	Steatohepatitis	Hepatocellular_damage_and_hepatitis_NEC	Hepatic_and_hepatobiliary_disorders	Hepatobiliary_disorders
Steatohepatitis	P00746	5419	Steatohepatitis	Hepatocellular_damage_and_hepatitis_NEC	Hepatic_and_hepatobiliary_disorders	Hepatobiliary_disorders
Steatohepatitis	P35638	17281	Steatohepatitis	Hepatocellular_damage_and_hepatitis_NEC	Hepatic_and_hepatobiliary_disorders	Hepatobiliary_disorders
Steatohepatitis	Q10586	54037	Steatohepatitis	Hepatocellular_damage_and_hepatitis_NEC	Hepatic_and_hepatobiliary_disorders	Hepatobiliary_disorders
Steatohepatitis	Q16678	48161	Steatohepatitis	Hepatocellular_damage_and_hepatitis_NEC	Hepatic_and_hepatobiliary_disorders	Hepatobiliary_disorders
Steatohepatitis	O14493	43488	Steatohepatitis	Hepatocellular_damage_and_hepatitis_NEC	Hepatic_and_hepatobiliary_disorders	Hepatobiliary_disorders
Steatohepatitis	P53567	17299	Steatohepatitis	Hepatocellular_damage_and_hepatitis_NEC	Hepatic_and_hepatobiliary_disorders	Hepatobiliary_disorders
Steatohepatitis	P17676	17288	Steatohepatitis	Hepatocellular_damage_and_hepatitis_NEC	Hepatic_and_hepatobiliary_disorders	Hepatobiliary_disorders
Steatohepatitis	P28906	39240	Steatohepatitis	Hepatocellular_damage_and_hepatitis_NEC	Hepatic_and_hepatobiliary_disorders	Hepatobiliary_disorders
Steatohepatitis	P30988	33582	Steatohepatitis	Hepatocellular_damage_and_hepatitis_NEC	Hepatic_and_hepatobiliary_disorders	Hepatobiliary_disorders
Steatohepatitis	P01350	63149	Steatohepatitis	Hepatocellular_damage_and_hepatitis_NEC	Hepatic_and_hepatobiliary_disorders	Hepatobiliary_disorders
Steatohepatitis	P04114	14219	Steatohepatitis	Hepatocellular_damage_and_hepatitis_NEC	Hepatic_and_hepatobiliary_disorders	Hepatobiliary_disorders
Steatohepatitis	Q13489	13519	Steatohepatitis	Hepatocellular_damage_and_hepatitis_NEC	Hepatic_and_hepatobiliary_disorders	Hepatobiliary_disorders
Steatohepatitis	P48728	62550	Steatohepatitis	Hepatocellular_damage_and_hepatitis_NEC	Hepatic_and_hepatobiliary_disorders	Hepatobiliary_disorders
Steatohepatitis	Q99541	59091	Steatohepatitis	Hepatocellular_damage_and_hepatitis_NEC	Hepatic_and_hepatobiliary_disorders	Hepatobiliary_disorders
Steatohepatitis	Q11130	62029	Steatohepatitis	Hepatocellular_damage_and_hepatitis_NEC	Hepatic_and_hepatobiliary_disorders	Hepatobiliary_disorders
Steatohepatitis	P00734	45326	Steatohepatitis	Hepatocellular_damage_and_hepatitis_NEC	Hepatic_and_hepatobiliary_disorders	Hepatobiliary_disorders
Steatohepatitis	P35670	21273	Steatohepatitis	Hepatocellular_damage_and_hepatitis_NEC	Hepatic_and_hepatobiliary_disorders	Hepatobiliary_disorders
Steatohepatitis	Q96EB6	13741	Steatohepatitis	Hepatocellular_damage_and_hepatitis_NEC	Hepatic_and_hepatobiliary_disorders	Hepatobiliary_disorders
Steatohepatitis	P55084	12982	Steatohepatitis	Hepatocellular_damage_and_hepatitis_NEC	Hepatic_and_hepatobiliary_disorders	Hepatobiliary_disorders
Steatohepatitis	P17861	17283	Steatohepatitis	Hepatocellular_damage_and_hepatitis_NEC	Hepatic_and_hepatobiliary_disorders	Hepatobiliary_disorders
Steatohepatitis	Q8NG66	14170	Steatohepatitis	Hepatocellular_damage_and_hepatitis_NEC	Hepatic_and_hepatobiliary_disorders	Hepatobiliary_disorders
Steatohepatitis	P36956	13974	Steatohepatitis	Hepatocellular_damage_and_hepatitis_NEC	Hepatic_and_hepatobiliary_disorders	Hepatobiliary_disorders
Steatohepatitis	Q9HCS2	46135	Steatohepatitis	Hepatocellular_damage_and_hepatitis_NEC	Hepatic_and_hepatobiliary_disorders	Hepatobiliary_disorders
Steatohepatitis	P00749	58637	Steatohepatitis	Hepatocellular_damage_and_hepatitis_NEC	Hepatic_and_hepatobiliary_disorders	Hepatobiliary_disorders
Steatohepatitis	Q9BUT1	25189	Steatohepatitis	Hepatocellular_damage_and_hepatitis_NEC	Hepatic_and_hepatobiliary_disorders	Hepatobiliary_disorders
Steatohepatitis	Q03181	13902	Steatohepatitis	Hepatocellular_damage_and_hepatitis_NEC	Hepatic_and_hepatobiliary_disorders	Hepatobiliary_disorders
Steatohepatitis	Q9Y394	7777	Steatohepatitis	Hepatocellular_damage_and_hepatitis_NEC	Hepatic_and_hepatobiliary_disorders	Hepatobiliary_disorders
Steatohepatitis	Q9Y3B3	21104	Steatohepatitis	Hepatocellular_damage_and_hepatitis_NEC	Hepatic_and_hepatobiliary_disorders	Hepatobiliary_disorders
Steatohepatitis	Q9NPH5	69540	Steatohepatitis	Hepatocellular_damage_and_hepatitis_NEC	Hepatic_and_hepatobiliary_disorders	Hepatobiliary_disorders
Steatohepatitis	Q9H8P0	19369	Steatohepatitis	Hepatocellular_damage_and_hepatitis_NEC	Hepatic_and_hepatobiliary_disorders	Hepatobiliary_disorders
Steatohepatitis	Q9NSA1	69534	Steatohepatitis	Hepatocellular_damage_and_hepatitis_NEC	Hepatic_and_hepatobiliary_disorders	Hepatobiliary_disorders
Steatohepatitis	A1YPR0	64487	Steatohepatitis	Hepatocellular_damage_and_hepatitis_NEC	Hepatic_and_hepatobiliary_disorders	Hepatobiliary_disorders
Amyloidosis	P40313	50321	Amyloidosis	Amyloidoses	Immune_disorders_NEC	Immune_system_disorders
Amyloidosis	Q99460	6302	Amyloidosis	Amyloidoses	Immune_disorders_NEC	Immune_system_disorders
Amyloidosis	O00233	6399	Amyloidosis	Amyloidoses	Immune_disorders_NEC	Immune_system_disorders
Amyloidosis	P61289	15977	Amyloidosis	Amyloidoses	Immune_disorders_NEC	Immune_system_disorders
Amyloidosis	P48556	15800	Amyloidosis	Amyloidoses	Immune_disorders_NEC	Immune_system_disorders
Amyloidosis	P55036	6402	Amyloidosis	Amyloidoses	Immune_disorders_NEC	Immune_system_disorders
Amyloidosis	Q13200	6947	Amyloidosis	Amyloidoses	Immune_disorders_NEC	Immune_system_disorders
Amyloidosis	P25963	7593	Amyloidosis	Amyloidoses	Immune_disorders_NEC	Immune_system_disorders
Anaphylactic_reaction	P24534	7571	Anaphylactic_reaction	Anaphylactic_and_anaphylactoid_responses	Allergic_conditions	Immune_system_disorders
Anaphylactic_reaction	Q8IWT1	65347	Anaphylactic_reaction	Anaphylactic_and_anaphylactoid_responses	Allergic_conditions	Immune_system_disorders
Anaphylactic_reaction	Q9NY72	65583	Anaphylactic_reaction	Anaphylactic_and_anaphylactoid_responses	Allergic_conditions	Immune_system_disorders
Anaphylactic_reaction	Q15818	27725	Anaphylactic_reaction	Anaphylactic_and_anaphylactoid_responses	Allergic_conditions	Immune_system_disorders
Anaphylactic_reaction	P02741	49240	Anaphylactic_reaction	Anaphylactic_and_anaphylactoid_responses	Allergic_conditions	Immune_system_disorders
Anaphylactic_reaction	P21917	59953	Anaphylactic_reaction	Anaphylactic_and_anaphylactoid_responses	Allergic_conditions	Immune_system_disorders
Anaphylactic_reaction	P13945	8611	Anaphylactic_reaction	Anaphylactic_and_anaphylactoid_responses	Allergic_conditions	Immune_system_disorders
Anaphylactic_reaction	Q9NZT2	62165	Anaphylactic_reaction	Anaphylactic_and_anaphylactoid_responses	Allergic_conditions	Immune_system_disorders
Anaphylactic_reaction	P14416	59942	Anaphylactic_reaction	Anaphylactic_and_anaphylactoid_responses	Allergic_conditions	Immune_system_disorders
Anaphylactic_reaction	P23415	66928	Anaphylactic_reaction	Anaphylactic_and_anaphylactoid_responses	Allergic_conditions	Immune_system_disorders
Anaphylactic_reaction	P35462	59949	Anaphylactic_reaction	Anaphylactic_and_anaphylactoid_responses	Allergic_conditions	Immune_system_disorders
Anaphylactic_reaction	P07550	8602	Anaphylactic_reaction	Anaphylactic_and_anaphylactoid_responses	Allergic_conditions	Immune_system_disorders
Anaphylactic_reaction	P08588	8592	Anaphylactic_reaction	Anaphylactic_and_anaphylactoid_responses	Allergic_conditions	Immune_system_disorders
Anaphylactic_reaction	P20648	20971	Anaphylactic_reaction	Anaphylactic_and_anaphylactoid_responses	Allergic_conditions	Immune_system_disorders
Anaphylactic_reaction	P21728	59934	Anaphylactic_reaction	Anaphylactic_and_anaphylactoid_responses	Allergic_conditions	Immune_system_disorders
Anaphylactic_reaction	P21817	19832	Anaphylactic_reaction	Anaphylactic_and_anaphylactoid_responses	Allergic_conditions	Immune_system_disorders
Anaphylactic_reaction	O95502	10142	Anaphylactic_reaction	Anaphylactic_and_anaphylactoid_responses	Allergic_conditions	Immune_system_disorders
Anaphylactic_reaction	P15692	6770	Anaphylactic_reaction	Anaphylactic_and_anaphylactoid_responses	Allergic_conditions	Immune_system_disorders
Anaphylactic_reaction	P47972	67867	Anaphylactic_reaction	Anaphylactic_and_anaphylactoid_responses	Allergic_conditions	Immune_system_disorders
Anaphylactic_reaction	P23416	60837	Anaphylactic_reaction	Anaphylactic_and_anaphylactoid_responses	Allergic_conditions	Immune_system_disorders
Anaphylactic_reaction	P35499	68424	Anaphylactic_reaction	Anaphylactic_and_anaphylactoid_responses	Allergic_conditions	Immune_system_disorders
Anaphylactic_reaction	P35498	66662	Anaphylactic_reaction	Anaphylactic_and_anaphylactoid_responses	Allergic_conditions	Immune_system_disorders
Anaphylactic_reaction	Q12809	61990	Anaphylactic_reaction	Anaphylactic_and_anaphylactoid_responses	Allergic_conditions	Immune_system_disorders
Anaphylactic_reaction	P11388	31795	Anaphylactic_reaction	Anaphylactic_and_anaphylactoid_responses	Allergic_conditions	Immune_system_disorders
Anaphylactic_reaction	Q07699	67308	Anaphylactic_reaction	Anaphylactic_and_anaphylactoid_responses	Allergic_conditions	Immune_system_disorders
Anaphylactic_reaction	P48167	15734	Anaphylactic_reaction	Anaphylactic_and_anaphylactoid_responses	Allergic_conditions	Immune_system_disorders
Anaphylactic_reaction	Q01118	14782	Anaphylactic_reaction	Anaphylactic_and_anaphylactoid_responses	Allergic_conditions	Immune_system_disorders
Anaphylactic_reaction	Q9NY46	64563	Anaphylactic_reaction	Anaphylactic_and_anaphylactoid_responses	Allergic_conditions	Immune_system_disorders
Anaphylactoid_reaction	P12821	4912	Anaphylactoid_reaction	Anaphylactic_and_anaphylactoid_responses	Allergic_conditions	Immune_system_disorders
Atrial_fibrillation	P07948	13896	Atrial_fibrillation	Supraventricular_arrhythmias	Cardiac_arrhythmias	Cardiac_disorders
Atrial_fibrillation	P21802	12961	Atrial_fibrillation	Supraventricular_arrhythmias	Cardiac_arrhythmias	Cardiac_disorders
Atrial_fibrillation	P00533	6549	Atrial_fibrillation	Supraventricular_arrhythmias	Cardiac_arrhythmias	Cardiac_disorders
Atrial_fibrillation	P22460	13998	Atrial_fibrillation	Supraventricular_arrhythmias	Cardiac_arrhythmias	Cardiac_disorders
Atrial_fibrillation	P51787	60361	Atrial_fibrillation	Supraventricular_arrhythmias	Cardiac_arrhythmias	Cardiac_disorders
Atrial_fibrillation	P16234	30708	Atrial_fibrillation	Supraventricular_arrhythmias	Cardiac_arrhythmias	Cardiac_disorders
Atrial_fibrillation	P00519	3596	Atrial_fibrillation	Supraventricular_arrhythmias	Cardiac_arrhythmias	Cardiac_disorders
Atrial_fibrillation	P06239	6064	Atrial_fibrillation	Supraventricular_arrhythmias	Cardiac_arrhythmias	Cardiac_disorders
Atrial_fibrillation	P09619	13540	Atrial_fibrillation	Supraventricular_arrhythmias	Cardiac_arrhythmias	Cardiac_disorders
Atrial_fibrillation	P12931	14635	Atrial_fibrillation	Supraventricular_arrhythmias	Cardiac_arrhythmias	Cardiac_disorders
Azoospermia	P05093	48093	Azoospermia	Spermatogenesis_and_semen_disorders	Sexual_function_and_fertility_disorders	Reproductive_system_and_breast_disorders
Azoospermia	P31213	128785	Azoospermia	Spermatogenesis_and_semen_disorders	Sexual_function_and_fertility_disorders	Reproductive_system_and_breast_disorders
Azoospermia	P18405	81905	Azoospermia	Spermatogenesis_and_semen_disorders	Sexual_function_and_fertility_disorders	Reproductive_system_and_breast_disorders
Back_pain	P43088	43879	Back_pain	Musculoskeletal_and_connective_tissue_pain_and_discomfort	Musculoskeletal_and_connective_tissue_disorders_NEC	Musculoskeletal_and_connective_tissue_disorders
Bladder_pain	Q15303	14305	Bladder_pain	Bladder_and_urethral_symptoms	Urinary_tract_signs_and_symptoms	Renal_and_urinary_disorders
Breath_odour	Q9H1D0	63056	Breath_odour	Gastrointestinal_signs_and_symptoms_NEC	Gastrointestinal_signs_and_symptoms	Gastrointestinal_disorders
Breath_odour	P35498	66662	Breath_odour	Gastrointestinal_signs_and_symptoms_NEC	Gastrointestinal_signs_and_symptoms	Gastrointestinal_disorders
Breath_odour	Q9BZL6	64649	Breath_odour	Gastrointestinal_signs_and_symptoms_NEC	Gastrointestinal_signs_and_symptoms	Gastrointestinal_disorders
Breath_odour	Q14643	26005	Breath_odour	Gastrointestinal_signs_and_symptoms_NEC	Gastrointestinal_signs_and_symptoms	Gastrointestinal_disorders
Breath_odour	Q15413	51944	Breath_odour	Gastrointestinal_signs_and_symptoms_NEC	Gastrointestinal_signs_and_symptoms	Gastrointestinal_disorders
Breath_odour	P98161	67045	Breath_odour	Gastrointestinal_signs_and_symptoms_NEC	Gastrointestinal_signs_and_symptoms	Gastrointestinal_disorders
Breath_odour	O75762	4865	Breath_odour	Gastrointestinal_signs_and_symptoms_NEC	Gastrointestinal_signs_and_symptoms	Gastrointestinal_disorders
Breath_odour	P11388	31795	Breath_odour	Gastrointestinal_signs_and_symptoms_NEC	Gastrointestinal_signs_and_symptoms	Gastrointestinal_disorders
Breath_odour	Q13563	16075	Breath_odour	Gastrointestinal_signs_and_symptoms_NEC	Gastrointestinal_signs_and_symptoms	Gastrointestinal_disorders
Breath_odour	P20648	20971	Breath_odour	Gastrointestinal_signs_and_symptoms_NEC	Gastrointestinal_signs_and_symptoms	Gastrointestinal_disorders
Breath_odour	P21917	59953	Breath_odour	Gastrointestinal_signs_and_symptoms_NEC	Gastrointestinal_signs_and_symptoms	Gastrointestinal_disorders
Breath_odour	P21817	19832	Breath_odour	Gastrointestinal_signs_and_symptoms_NEC	Gastrointestinal_signs_and_symptoms	Gastrointestinal_disorders
Breath_odour	Q14573	5758	Breath_odour	Gastrointestinal_signs_and_symptoms_NEC	Gastrointestinal_signs_and_symptoms	Gastrointestinal_disorders
Breath_odour	Q92736	6953	Breath_odour	Gastrointestinal_signs_and_symptoms_NEC	Gastrointestinal_signs_and_symptoms	Gastrointestinal_disorders
Breath_odour	Q15139	13918	Breath_odour	Gastrointestinal_signs_and_symptoms_NEC	Gastrointestinal_signs_and_symptoms	Gastrointestinal_disorders
Breath_odour	P62701	12851	Breath_odour	Gastrointestinal_signs_and_symptoms_NEC	Gastrointestinal_signs_and_symptoms	Gastrointestinal_disorders
Cholestasis	P00918	33167	Cholestasis	Cholestasis_and_jaundice	Hepatic_and_hepatobiliary_disorders	Hepatobiliary_disorders
Cholestasis	P22748	33200	Cholestasis	Cholestasis_and_jaundice	Hepatic_and_hepatobiliary_disorders	Hepatobiliary_disorders
Chromaturia	P42684	3600	Chromaturia	Urinary_abnormalities	Urinary_tract_signs_and_symptoms	Renal_and_urinary_disorders
Chromaturia	P09619	13540	Chromaturia	Urinary_abnormalities	Urinary_tract_signs_and_symptoms	Renal_and_urinary_disorders
Chromaturia	P16234	30708	Chromaturia	Urinary_abnormalities	Urinary_tract_signs_and_symptoms	Renal_and_urinary_disorders
Chromaturia	P07948	13896	Chromaturia	Urinary_abnormalities	Urinary_tract_signs_and_symptoms	Renal_and_urinary_disorders
Coagulopathy	P41143	50773	Coagulopathy	Coagulopathies	Coagulopathies_and_bleeding_diatheses_(excl_thrombocytopenic)	Blood_and_lymphatic_system_disorders
Coagulopathy	P41145	62583	Coagulopathy	Coagulopathies	Coagulopathies_and_bleeding_diatheses_(excl_thrombocytopenic)	Blood_and_lymphatic_system_disorders
Coordination_abnormal	P14867	66309	Coordination_abnormal	Coordination_and_balance_disturbances	Neurological_disorders_NEC	Nervous_system_disorders
Coordination_abnormal	P28472	64664	Coordination_abnormal	Coordination_and_balance_disturbances	Neurological_disorders_NEC	Nervous_system_disorders
Deafness	P21918	59957	Deafness	Hearing_losses	Hearing_disorders	Ear_and_labyrinth_disorders
Deafness	P24534	7571	Deafness	Hearing_losses	Hearing_disorders	Ear_and_labyrinth_disorders
Deafness	Q8IWT1	65347	Deafness	Hearing_losses	Hearing_disorders	Ear_and_labyrinth_disorders
Deafness	Q9NY72	65583	Deafness	Hearing_losses	Hearing_disorders	Ear_and_labyrinth_disorders
Deafness	Q15413	51944	Deafness	Hearing_losses	Hearing_disorders	Ear_and_labyrinth_disorders
Deafness	P21917	59953	Deafness	Hearing_losses	Hearing_disorders	Ear_and_labyrinth_disorders
Deafness	Q9Y237	18933	Deafness	Hearing_losses	Hearing_disorders	Ear_and_labyrinth_disorders
Deafness	P14416	59942	Deafness	Hearing_losses	Hearing_disorders	Ear_and_labyrinth_disorders
Deafness	Q9Y3C6	22648	Deafness	Hearing_losses	Hearing_disorders	Ear_and_labyrinth_disorders
Deafness	P62937	17592	Deafness	Hearing_losses	Hearing_disorders	Ear_and_labyrinth_disorders
Deafness	Q02790	42486	Deafness	Hearing_losses	Hearing_disorders	Ear_and_labyrinth_disorders
Deafness	Q9H2H8	28005	Deafness	Hearing_losses	Hearing_disorders	Ear_and_labyrinth_disorders
Deafness	Q9UNP9	13991	Deafness	Hearing_losses	Hearing_disorders	Ear_and_labyrinth_disorders
Deafness	P35462	59949	Deafness	Hearing_losses	Hearing_disorders	Ear_and_labyrinth_disorders
Deafness	Q9BZL6	64649	Deafness	Hearing_losses	Hearing_disorders	Ear_and_labyrinth_disorders
Deafness	P20648	20971	Deafness	Hearing_losses	Hearing_disorders	Ear_and_labyrinth_disorders
Deafness	P21728	59934	Deafness	Hearing_losses	Hearing_disorders	Ear_and_labyrinth_disorders
Deafness	Q86TJ2	26099	Deafness	Hearing_losses	Hearing_disorders	Ear_and_labyrinth_disorders
Deafness	P21817	19832	Deafness	Hearing_losses	Hearing_disorders	Ear_and_labyrinth_disorders
Deafness	O95302	16153	Deafness	Hearing_losses	Hearing_disorders	Ear_and_labyrinth_disorders
Deafness	Q14524	18291	Deafness	Hearing_losses	Hearing_disorders	Ear_and_labyrinth_disorders
Deafness	P62701	12851	Deafness	Hearing_losses	Hearing_disorders	Ear_and_labyrinth_disorders
Deafness	O75344	45290	Deafness	Hearing_losses	Hearing_disorders	Ear_and_labyrinth_disorders
Deafness	Q9H1D0	63056	Deafness	Hearing_losses	Hearing_disorders	Ear_and_labyrinth_disorders
Deafness	Q14643	26005	Deafness	Hearing_losses	Hearing_disorders	Ear_and_labyrinth_disorders
Deafness	O60443	19492	Deafness	Hearing_losses	Hearing_disorders	Ear_and_labyrinth_disorders
Deafness	Q14318	15929	Deafness	Hearing_losses	Hearing_disorders	Ear_and_labyrinth_disorders
Deafness	Q08752	35603	Deafness	Hearing_losses	Hearing_disorders	Ear_and_labyrinth_disorders
Deafness	P98161	67045	Deafness	Hearing_losses	Hearing_disorders	Ear_and_labyrinth_disorders
Deafness	O75762	4865	Deafness	Hearing_losses	Hearing_disorders	Ear_and_labyrinth_disorders
Deafness	Q13563	16075	Deafness	Hearing_losses	Hearing_disorders	Ear_and_labyrinth_disorders
Deafness	P23284	6791	Deafness	Hearing_losses	Hearing_disorders	Ear_and_labyrinth_disorders
Deafness	P56696	64092	Deafness	Hearing_losses	Hearing_disorders	Ear_and_labyrinth_disorders
Deafness	Q13356	32240	Deafness	Hearing_losses	Hearing_disorders	Ear_and_labyrinth_disorders
Deafness	Q14573	5758	Deafness	Hearing_losses	Hearing_disorders	Ear_and_labyrinth_disorders
Deafness	Q92736	6953	Deafness	Hearing_losses	Hearing_disorders	Ear_and_labyrinth_disorders
Deafness	Q15139	13918	Deafness	Hearing_losses	Hearing_disorders	Ear_and_labyrinth_disorders
Deafness	Q13451	17580	Deafness	Hearing_losses	Hearing_disorders	Ear_and_labyrinth_disorders
Deafness	P35499	68424	Deafness	Hearing_losses	Hearing_disorders	Ear_and_labyrinth_disorders
Deafness	P45877	63606	Deafness	Hearing_losses	Hearing_disorders	Ear_and_labyrinth_disorders
Deafness	P35498	66662	Deafness	Hearing_losses	Hearing_disorders	Ear_and_labyrinth_disorders
Deafness	P26885	58940	Deafness	Hearing_losses	Hearing_disorders	Ear_and_labyrinth_disorders
Deafness	Q00688	62729	Deafness	Hearing_losses	Hearing_disorders	Ear_and_labyrinth_disorders
Deafness	P11388	31795	Deafness	Hearing_losses	Hearing_disorders	Ear_and_labyrinth_disorders
Deafness	Q07699	67308	Deafness	Hearing_losses	Hearing_disorders	Ear_and_labyrinth_disorders
Deafness	Q9Y680	21130	Deafness	Hearing_losses	Hearing_disorders	Ear_and_labyrinth_disorders
Deafness	P68106	50788	Deafness	Hearing_losses	Hearing_disorders	Ear_and_labyrinth_disorders
Deafness	Q01118	14782	Deafness	Hearing_losses	Hearing_disorders	Ear_and_labyrinth_disorders
Deafness	P30405	51465	Deafness	Hearing_losses	Hearing_disorders	Ear_and_labyrinth_disorders
Deafness	Q13427	6260	Deafness	Hearing_losses	Hearing_disorders	Ear_and_labyrinth_disorders
Deafness	Q13526	19566	Deafness	Hearing_losses	Hearing_disorders	Ear_and_labyrinth_disorders
Deafness	Q9NY46	64563	Deafness	Hearing_losses	Hearing_disorders	Ear_and_labyrinth_disorders
Dermatitis_atopic	P43088	43879	Dermatitis_atopic	Dermatitis_and_eczema	Epidermal_and_dermal_conditions	Skin_and_subcutaneous_tissue_disorders
Dermatitis_atopic	P04150	29101	Dermatitis_atopic	Dermatitis_and_eczema	Epidermal_and_dermal_conditions	Skin_and_subcutaneous_tissue_disorders
Diplegia	P04150	29101	Diplegia	Paralysis_and_paresis_(excl_cranial_nerve)	Movement_disorders_(incl_parkinsonism)	Nervous_system_disorders
Duodenitis	P21917	59953	Duodenitis	Gastrointestinal_inflammatory_disorders_NEC	Gastrointestinal_inflammatory_conditions	Gastrointestinal_disorders
Duodenitis	Q9Y237	18933	Duodenitis	Gastrointestinal_inflammatory_disorders_NEC	Gastrointestinal_inflammatory_conditions	Gastrointestinal_disorders
Duodenitis	Q9Y3C6	22648	Duodenitis	Gastrointestinal_inflammatory_disorders_NEC	Gastrointestinal_inflammatory_conditions	Gastrointestinal_disorders
Duodenitis	P62937	17592	Duodenitis	Gastrointestinal_inflammatory_disorders_NEC	Gastrointestinal_inflammatory_conditions	Gastrointestinal_disorders
Duodenitis	Q02790	42486	Duodenitis	Gastrointestinal_inflammatory_disorders_NEC	Gastrointestinal_inflammatory_conditions	Gastrointestinal_disorders
Duodenitis	Q9H2H8	28005	Duodenitis	Gastrointestinal_inflammatory_disorders_NEC	Gastrointestinal_inflammatory_conditions	Gastrointestinal_disorders
Duodenitis	Q9UNP9	13991	Duodenitis	Gastrointestinal_inflammatory_disorders_NEC	Gastrointestinal_inflammatory_conditions	Gastrointestinal_disorders
Duodenitis	P20648	20971	Duodenitis	Gastrointestinal_inflammatory_disorders_NEC	Gastrointestinal_inflammatory_conditions	Gastrointestinal_disorders
Duodenitis	O95302	16153	Duodenitis	Gastrointestinal_inflammatory_disorders_NEC	Gastrointestinal_inflammatory_conditions	Gastrointestinal_disorders
Duodenitis	O75344	45290	Duodenitis	Gastrointestinal_inflammatory_disorders_NEC	Gastrointestinal_inflammatory_conditions	Gastrointestinal_disorders
Duodenitis	Q14318	15929	Duodenitis	Gastrointestinal_inflammatory_disorders_NEC	Gastrointestinal_inflammatory_conditions	Gastrointestinal_disorders
Duodenitis	Q08752	35603	Duodenitis	Gastrointestinal_inflammatory_disorders_NEC	Gastrointestinal_inflammatory_conditions	Gastrointestinal_disorders
Duodenitis	P23284	6791	Duodenitis	Gastrointestinal_inflammatory_disorders_NEC	Gastrointestinal_inflammatory_conditions	Gastrointestinal_disorders
Duodenitis	Q13356	32240	Duodenitis	Gastrointestinal_inflammatory_disorders_NEC	Gastrointestinal_inflammatory_conditions	Gastrointestinal_disorders
Duodenitis	P45877	63606	Duodenitis	Gastrointestinal_inflammatory_disorders_NEC	Gastrointestinal_inflammatory_conditions	Gastrointestinal_disorders
Duodenitis	Q13451	17580	Duodenitis	Gastrointestinal_inflammatory_disorders_NEC	Gastrointestinal_inflammatory_conditions	Gastrointestinal_disorders
Duodenitis	P26885	58940	Duodenitis	Gastrointestinal_inflammatory_disorders_NEC	Gastrointestinal_inflammatory_conditions	Gastrointestinal_disorders
Duodenitis	Q00688	62729	Duodenitis	Gastrointestinal_inflammatory_disorders_NEC	Gastrointestinal_inflammatory_conditions	Gastrointestinal_disorders
Duodenitis	Q9Y680	21130	Duodenitis	Gastrointestinal_inflammatory_disorders_NEC	Gastrointestinal_inflammatory_conditions	Gastrointestinal_disorders
Duodenitis	P68106	50788	Duodenitis	Gastrointestinal_inflammatory_disorders_NEC	Gastrointestinal_inflammatory_conditions	Gastrointestinal_disorders
Duodenitis	P30405	51465	Duodenitis	Gastrointestinal_inflammatory_disorders_NEC	Gastrointestinal_inflammatory_conditions	Gastrointestinal_disorders
Duodenitis	Q13427	6260	Duodenitis	Gastrointestinal_inflammatory_disorders_NEC	Gastrointestinal_inflammatory_conditions	Gastrointestinal_disorders
Duodenitis	Q13526	19566	Duodenitis	Gastrointestinal_inflammatory_disorders_NEC	Gastrointestinal_inflammatory_conditions	Gastrointestinal_disorders
Ear_pain	Q16539	7862	Ear_pain	Ear_disorders_NEC	Aural_disorders_NEC	Ear_and_labyrinth_disorders
Enterocolitis	P11388	31795	Enterocolitis	Gastrointestinal_inflammatory_disorders_NEC	Gastrointestinal_inflammatory_conditions	Gastrointestinal_disorders
Enterocolitis	P27707	36152	Enterocolitis	Gastrointestinal_inflammatory_disorders_NEC	Gastrointestinal_inflammatory_conditions	Gastrointestinal_disorders
Enterocolitis	P02741	49240	Enterocolitis	Gastrointestinal_inflammatory_disorders_NEC	Gastrointestinal_inflammatory_conditions	Gastrointestinal_disorders
Enterocolitis	Q02880	12976	Enterocolitis	Gastrointestinal_inflammatory_disorders_NEC	Gastrointestinal_inflammatory_conditions	Gastrointestinal_disorders
Enterocolitis	P10721	64056	Enterocolitis	Gastrointestinal_inflammatory_disorders_NEC	Gastrointestinal_inflammatory_conditions	Gastrointestinal_disorders
Enterocolitis	P10415	14677	Enterocolitis	Gastrointestinal_inflammatory_disorders_NEC	Gastrointestinal_inflammatory_conditions	Gastrointestinal_disorders
Erythema_nodosum	P42330	10255	Erythema_nodosum	Panniculitides	Skin_and_subcutaneous_tissue_disorders_NEC	Skin_and_subcutaneous_tissue_disorders
Erythema_nodosum	P08842	66077	Erythema_nodosum	Panniculitides	Skin_and_subcutaneous_tissue_disorders_NEC	Skin_and_subcutaneous_tissue_disorders
Erythema_nodosum	P03372	14636	Erythema_nodosum	Panniculitides	Skin_and_subcutaneous_tissue_disorders_NEC	Skin_and_subcutaneous_tissue_disorders
Erythema_nodosum	Q92731	50933	Erythema_nodosum	Panniculitides	Skin_and_subcutaneous_tissue_disorders_NEC	Skin_and_subcutaneous_tissue_disorders
Erythema_nodosum	P14061	57409	Erythema_nodosum	Panniculitides	Skin_and_subcutaneous_tissue_disorders_NEC	Skin_and_subcutaneous_tissue_disorders
Febrile_neutropenia	P07948	13896	Febrile_neutropenia	Neutropenias	White_blood_cell_disorders	Blood_and_lymphatic_system_disorders
Febrile_neutropenia	Q59H18	37734	Febrile_neutropenia	Neutropenias	White_blood_cell_disorders	Blood_and_lymphatic_system_disorders
Febrile_neutropenia	P00533	6549	Febrile_neutropenia	Neutropenias	White_blood_cell_disorders	Blood_and_lymphatic_system_disorders
Febrile_neutropenia	P00519	3596	Febrile_neutropenia	Neutropenias	White_blood_cell_disorders	Blood_and_lymphatic_system_disorders
Febrile_neutropenia	P06239	6064	Febrile_neutropenia	Neutropenias	White_blood_cell_disorders	Blood_and_lymphatic_system_disorders
Febrile_neutropenia	P42345	13849	Febrile_neutropenia	Neutropenias	White_blood_cell_disorders	Blood_and_lymphatic_system_disorders
Febrile_neutropenia	P09619	13540	Febrile_neutropenia	Neutropenias	White_blood_cell_disorders	Blood_and_lymphatic_system_disorders
Febrile_neutropenia	P07333	13515	Febrile_neutropenia	Neutropenias	White_blood_cell_disorders	Blood_and_lymphatic_system_disorders
Febrile_neutropenia	P42684	3600	Febrile_neutropenia	Neutropenias	White_blood_cell_disorders	Blood_and_lymphatic_system_disorders
Febrile_neutropenia	P12931	14635	Febrile_neutropenia	Neutropenias	White_blood_cell_disorders	Blood_and_lymphatic_system_disorders
Fibrocystic_breast_disease	P08842	66077	Fibrocystic_breast_disease	Breast_disorders_NEC	Breast_disorders	Reproductive_system_and_breast_disorders
Fibrocystic_breast_disease	P42330	10255	Fibrocystic_breast_disease	Breast_disorders_NEC	Breast_disorders	Reproductive_system_and_breast_disorders
Fibrocystic_breast_disease	P14061	57409	Fibrocystic_breast_disease	Breast_disorders_NEC	Breast_disorders	Reproductive_system_and_breast_disorders
Fistula	P35968	14637	Fistula	Soft_tissue_disorders_NEC	Musculoskeletal_and_connective_tissue_disorders_NEC	Musculoskeletal_and_connective_tissue_disorders
Flushing	P24534	7571	Flushing	Peripheral_vascular_disorders_NEC	Vascular_disorders_NEC	Vascular_disorders
Flushing	Q8IWT1	65347	Flushing	Peripheral_vascular_disorders_NEC	Vascular_disorders_NEC	Vascular_disorders
Flushing	Q9NY72	65583	Flushing	Peripheral_vascular_disorders_NEC	Vascular_disorders_NEC	Vascular_disorders
Flushing	P22303	4896	Flushing	Peripheral_vascular_disorders_NEC	Vascular_disorders_NEC	Vascular_disorders
Flushing	Q15413	51944	Flushing	Peripheral_vascular_disorders_NEC	Vascular_disorders_NEC	Vascular_disorders
Flushing	P49019	51851	Flushing	Peripheral_vascular_disorders_NEC	Vascular_disorders_NEC	Vascular_disorders
Flushing	P21917	59953	Flushing	Peripheral_vascular_disorders_NEC	Vascular_disorders_NEC	Vascular_disorders
Flushing	P13945	8611	Flushing	Peripheral_vascular_disorders_NEC	Vascular_disorders_NEC	Vascular_disorders
Flushing	P04083	6035	Flushing	Peripheral_vascular_disorders_NEC	Vascular_disorders_NEC	Vascular_disorders
Flushing	P21675	18984	Flushing	Peripheral_vascular_disorders_NEC	Vascular_disorders_NEC	Vascular_disorders
Flushing	P35462	59949	Flushing	Peripheral_vascular_disorders_NEC	Vascular_disorders_NEC	Vascular_disorders
Flushing	Q9BZL6	64649	Flushing	Peripheral_vascular_disorders_NEC	Vascular_disorders_NEC	Vascular_disorders
Flushing	P07550	8602	Flushing	Peripheral_vascular_disorders_NEC	Vascular_disorders_NEC	Vascular_disorders
Flushing	P08588	8592	Flushing	Peripheral_vascular_disorders_NEC	Vascular_disorders_NEC	Vascular_disorders
Flushing	P21817	19832	Flushing	Peripheral_vascular_disorders_NEC	Vascular_disorders_NEC	Vascular_disorders
Flushing	P62701	12851	Flushing	Peripheral_vascular_disorders_NEC	Vascular_disorders_NEC	Vascular_disorders
Flushing	Q14524	18291	Flushing	Peripheral_vascular_disorders_NEC	Vascular_disorders_NEC	Vascular_disorders
Flushing	Q9H1D0	63056	Flushing	Peripheral_vascular_disorders_NEC	Vascular_disorders_NEC	Vascular_disorders
Flushing	Q14643	26005	Flushing	Peripheral_vascular_disorders_NEC	Vascular_disorders_NEC	Vascular_disorders
Flushing	P98161	67045	Flushing	Peripheral_vascular_disorders_NEC	Vascular_disorders_NEC	Vascular_disorders
Flushing	O75762	4865	Flushing	Peripheral_vascular_disorders_NEC	Vascular_disorders_NEC	Vascular_disorders
Flushing	Q13563	16075	Flushing	Peripheral_vascular_disorders_NEC	Vascular_disorders_NEC	Vascular_disorders
Flushing	Q14573	5758	Flushing	Peripheral_vascular_disorders_NEC	Vascular_disorders_NEC	Vascular_disorders
Flushing	Q92736	6953	Flushing	Peripheral_vascular_disorders_NEC	Vascular_disorders_NEC	Vascular_disorders
Flushing	Q15139	13918	Flushing	Peripheral_vascular_disorders_NEC	Vascular_disorders_NEC	Vascular_disorders
Flushing	P35499	68424	Flushing	Peripheral_vascular_disorders_NEC	Vascular_disorders_NEC	Vascular_disorders
Flushing	P35367	66564	Flushing	Peripheral_vascular_disorders_NEC	Vascular_disorders_NEC	Vascular_disorders
Flushing	P35498	66662	Flushing	Peripheral_vascular_disorders_NEC	Vascular_disorders_NEC	Vascular_disorders
Flushing	Q07699	67308	Flushing	Peripheral_vascular_disorders_NEC	Vascular_disorders_NEC	Vascular_disorders
Flushing	O76074	65602	Flushing	Peripheral_vascular_disorders_NEC	Vascular_disorders_NEC	Vascular_disorders
Flushing	Q01118	14782	Flushing	Peripheral_vascular_disorders_NEC	Vascular_disorders_NEC	Vascular_disorders
Flushing	P11511	48126	Flushing	Peripheral_vascular_disorders_NEC	Vascular_disorders_NEC	Vascular_disorders
Flushing	Q9NY46	64563	Flushing	Peripheral_vascular_disorders_NEC	Vascular_disorders_NEC	Vascular_disorders
Flushing	P12821	4912	Flushing	Peripheral_vascular_disorders_NEC	Vascular_disorders_NEC	Vascular_disorders
Glaucoma	P21918	59957	Glaucoma	Glaucomas_(excl_congenital)	Glaucoma_and_ocular_hypertension	Eye_disorders
Glaucoma	P24534	7571	Glaucoma	Glaucomas_(excl_congenital)	Glaucoma_and_ocular_hypertension	Eye_disorders
Glaucoma	Q9H227	65117	Glaucoma	Glaucomas_(excl_congenital)	Glaucoma_and_ocular_hypertension	Eye_disorders
Glaucoma	Q8IWT1	65347	Glaucoma	Glaucomas_(excl_congenital)	Glaucoma_and_ocular_hypertension	Eye_disorders
Glaucoma	Q9NY72	65583	Glaucoma	Glaucomas_(excl_congenital)	Glaucoma_and_ocular_hypertension	Eye_disorders
Glaucoma	P22303	4896	Glaucoma	Glaucomas_(excl_congenital)	Glaucoma_and_ocular_hypertension	Eye_disorders
Glaucoma	P21917	59953	Glaucoma	Glaucomas_(excl_congenital)	Glaucoma_and_ocular_hypertension	Eye_disorders
Glaucoma	Q9Y237	18933	Glaucoma	Glaucomas_(excl_congenital)	Glaucoma_and_ocular_hypertension	Eye_disorders
Glaucoma	P04083	6035	Glaucoma	Glaucomas_(excl_congenital)	Glaucoma_and_ocular_hypertension	Eye_disorders
Glaucoma	P14416	59942	Glaucoma	Glaucomas_(excl_congenital)	Glaucoma_and_ocular_hypertension	Eye_disorders
Glaucoma	Q9Y3C6	22648	Glaucoma	Glaucomas_(excl_congenital)	Glaucoma_and_ocular_hypertension	Eye_disorders
Glaucoma	P62937	17592	Glaucoma	Glaucomas_(excl_congenital)	Glaucoma_and_ocular_hypertension	Eye_disorders
Glaucoma	Q02790	42486	Glaucoma	Glaucomas_(excl_congenital)	Glaucoma_and_ocular_hypertension	Eye_disorders
Glaucoma	Q9H2H8	28005	Glaucoma	Glaucomas_(excl_congenital)	Glaucoma_and_ocular_hypertension	Eye_disorders
Glaucoma	Q9UNP9	13991	Glaucoma	Glaucomas_(excl_congenital)	Glaucoma_and_ocular_hypertension	Eye_disorders
Glaucoma	P35462	59949	Glaucoma	Glaucomas_(excl_congenital)	Glaucoma_and_ocular_hypertension	Eye_disorders
Glaucoma	P20648	20971	Glaucoma	Glaucomas_(excl_congenital)	Glaucoma_and_ocular_hypertension	Eye_disorders
Glaucoma	P21728	59934	Glaucoma	Glaucomas_(excl_congenital)	Glaucoma_and_ocular_hypertension	Eye_disorders
Glaucoma	O95302	16153	Glaucoma	Glaucomas_(excl_congenital)	Glaucoma_and_ocular_hypertension	Eye_disorders
Glaucoma	O75344	45290	Glaucoma	Glaucomas_(excl_congenital)	Glaucoma_and_ocular_hypertension	Eye_disorders
Glaucoma	Q14318	15929	Glaucoma	Glaucomas_(excl_congenital)	Glaucoma_and_ocular_hypertension	Eye_disorders
Glaucoma	Q08752	35603	Glaucoma	Glaucomas_(excl_congenital)	Glaucoma_and_ocular_hypertension	Eye_disorders
Glaucoma	P23284	6791	Glaucoma	Glaucomas_(excl_congenital)	Glaucoma_and_ocular_hypertension	Eye_disorders
Glaucoma	Q13356	32240	Glaucoma	Glaucomas_(excl_congenital)	Glaucoma_and_ocular_hypertension	Eye_disorders
Glaucoma	P04150	29101	Glaucoma	Glaucomas_(excl_congenital)	Glaucoma_and_ocular_hypertension	Eye_disorders
Glaucoma	O94808	66201	Glaucoma	Glaucomas_(excl_congenital)	Glaucoma_and_ocular_hypertension	Eye_disorders
Glaucoma	Q13451	17580	Glaucoma	Glaucomas_(excl_congenital)	Glaucoma_and_ocular_hypertension	Eye_disorders
Glaucoma	P35499	68424	Glaucoma	Glaucomas_(excl_congenital)	Glaucoma_and_ocular_hypertension	Eye_disorders
Glaucoma	P45877	63606	Glaucoma	Glaucomas_(excl_congenital)	Glaucoma_and_ocular_hypertension	Eye_disorders
Glaucoma	P35367	66564	Glaucoma	Glaucomas_(excl_congenital)	Glaucoma_and_ocular_hypertension	Eye_disorders
Glaucoma	P26885	58940	Glaucoma	Glaucomas_(excl_congenital)	Glaucoma_and_ocular_hypertension	Eye_disorders
Glaucoma	P35498	66662	Glaucoma	Glaucomas_(excl_congenital)	Glaucoma_and_ocular_hypertension	Eye_disorders
Glaucoma	Q00688	62729	Glaucoma	Glaucomas_(excl_congenital)	Glaucoma_and_ocular_hypertension	Eye_disorders
Glaucoma	Q07699	67308	Glaucoma	Glaucomas_(excl_congenital)	Glaucoma_and_ocular_hypertension	Eye_disorders
Glaucoma	Q9Y680	21130	Glaucoma	Glaucomas_(excl_congenital)	Glaucoma_and_ocular_hypertension	Eye_disorders
Glaucoma	P08185	36608	Glaucoma	Glaucomas_(excl_congenital)	Glaucoma_and_ocular_hypertension	Eye_disorders
Glaucoma	Q01118	14782	Glaucoma	Glaucomas_(excl_congenital)	Glaucoma_and_ocular_hypertension	Eye_disorders
Glaucoma	P68106	50788	Glaucoma	Glaucomas_(excl_congenital)	Glaucoma_and_ocular_hypertension	Eye_disorders
Glaucoma	P30405	51465	Glaucoma	Glaucomas_(excl_congenital)	Glaucoma_and_ocular_hypertension	Eye_disorders
Glaucoma	Q13427	6260	Glaucoma	Glaucomas_(excl_congenital)	Glaucoma_and_ocular_hypertension	Eye_disorders
Glaucoma	Q13526	19566	Glaucoma	Glaucomas_(excl_congenital)	Glaucoma_and_ocular_hypertension	Eye_disorders
Glaucoma	Q9NY46	64563	Glaucoma	Glaucomas_(excl_congenital)	Glaucoma_and_ocular_hypertension	Eye_disorders
Glucose_tolerance_impaired	P04150	29101	Glucose_tolerance_impaired	Hyperglycaemic_conditions_NEC	Glucose_metabolism_disorders_(incl_diabetes_mellitus)	Metabolism_and_nutrition_disorders
Goitre	P24534	7571	Goitre	Thyroid_disorders_NEC	Thyroid_gland_disorders	Endocrine_disorders
Goitre	Q8IWT1	65347	Goitre	Thyroid_disorders_NEC	Thyroid_gland_disorders	Endocrine_disorders
Goitre	Q9NY72	65583	Goitre	Thyroid_disorders_NEC	Thyroid_gland_disorders	Endocrine_disorders
Goitre	Q15413	51944	Goitre	Thyroid_disorders_NEC	Thyroid_gland_disorders	Endocrine_disorders
Goitre	P21917	59953	Goitre	Thyroid_disorders_NEC	Thyroid_gland_disorders	Endocrine_disorders
Goitre	P35462	59949	Goitre	Thyroid_disorders_NEC	Thyroid_gland_disorders	Endocrine_disorders
Goitre	Q9BZL6	64649	Goitre	Thyroid_disorders_NEC	Thyroid_gland_disorders	Endocrine_disorders
Goitre	P21817	19832	Goitre	Thyroid_disorders_NEC	Thyroid_gland_disorders	Endocrine_disorders
Goitre	P62701	12851	Goitre	Thyroid_disorders_NEC	Thyroid_gland_disorders	Endocrine_disorders
Goitre	Q14524	18291	Goitre	Thyroid_disorders_NEC	Thyroid_gland_disorders	Endocrine_disorders
Goitre	Q9H1D0	63056	Goitre	Thyroid_disorders_NEC	Thyroid_gland_disorders	Endocrine_disorders
Goitre	Q14643	26005	Goitre	Thyroid_disorders_NEC	Thyroid_gland_disorders	Endocrine_disorders
Goitre	P98161	67045	Goitre	Thyroid_disorders_NEC	Thyroid_gland_disorders	Endocrine_disorders
Goitre	O75762	4865	Goitre	Thyroid_disorders_NEC	Thyroid_gland_disorders	Endocrine_disorders
Goitre	Q13563	16075	Goitre	Thyroid_disorders_NEC	Thyroid_gland_disorders	Endocrine_disorders
Goitre	Q14573	5758	Goitre	Thyroid_disorders_NEC	Thyroid_gland_disorders	Endocrine_disorders
Goitre	Q92736	6953	Goitre	Thyroid_disorders_NEC	Thyroid_gland_disorders	Endocrine_disorders
Goitre	Q15139	13918	Goitre	Thyroid_disorders_NEC	Thyroid_gland_disorders	Endocrine_disorders
Goitre	P35499	68424	Goitre	Thyroid_disorders_NEC	Thyroid_gland_disorders	Endocrine_disorders
Goitre	P35498	66662	Goitre	Thyroid_disorders_NEC	Thyroid_gland_disorders	Endocrine_disorders
Goitre	Q07699	67308	Goitre	Thyroid_disorders_NEC	Thyroid_gland_disorders	Endocrine_disorders
Goitre	Q01118	14782	Goitre	Thyroid_disorders_NEC	Thyroid_gland_disorders	Endocrine_disorders
Goitre	Q9NY46	64563	Goitre	Thyroid_disorders_NEC	Thyroid_gland_disorders	Endocrine_disorders
Growth_retardation	P04150	29101	Growth_retardation	Musculoskeletal_and_connective_tissue_conditions_NEC	Musculoskeletal_and_connective_tissue_disorders_NEC	Musculoskeletal_and_connective_tissue_disorders
Gynaecomastia	P21918	59957	Gynaecomastia	Breast_disorders_NEC	Breast_disorders	Reproductive_system_and_breast_disorders
Gynaecomastia	P34969	1217	Gynaecomastia	Breast_disorders_NEC	Breast_disorders	Reproductive_system_and_breast_disorders
Gynaecomastia	P24534	7571	Gynaecomastia	Breast_disorders_NEC	Breast_disorders	Reproductive_system_and_breast_disorders
Gynaecomastia	Q8IWT1	65347	Gynaecomastia	Breast_disorders_NEC	Breast_disorders	Reproductive_system_and_breast_disorders
Gynaecomastia	Q9NY72	65583	Gynaecomastia	Breast_disorders_NEC	Breast_disorders	Reproductive_system_and_breast_disorders
Gynaecomastia	Q15413	51944	Gynaecomastia	Breast_disorders_NEC	Breast_disorders	Reproductive_system_and_breast_disorders
Gynaecomastia	P21917	59953	Gynaecomastia	Breast_disorders_NEC	Breast_disorders	Reproductive_system_and_breast_disorders
Gynaecomastia	P14416	59942	Gynaecomastia	Breast_disorders_NEC	Breast_disorders	Reproductive_system_and_breast_disorders
Gynaecomastia	P21675	18984	Gynaecomastia	Breast_disorders_NEC	Breast_disorders	Reproductive_system_and_breast_disorders
Gynaecomastia	P35462	59949	Gynaecomastia	Breast_disorders_NEC	Breast_disorders	Reproductive_system_and_breast_disorders
Gynaecomastia	Q9BZL6	64649	Gynaecomastia	Breast_disorders_NEC	Breast_disorders	Reproductive_system_and_breast_disorders
Gynaecomastia	P18825	8112	Gynaecomastia	Breast_disorders_NEC	Breast_disorders	Reproductive_system_and_breast_disorders
Gynaecomastia	Q16647	66524	Gynaecomastia	Breast_disorders_NEC	Breast_disorders	Reproductive_system_and_breast_disorders
Gynaecomastia	P05093	48093	Gynaecomastia	Breast_disorders_NEC	Breast_disorders	Reproductive_system_and_breast_disorders
Gynaecomastia	P21728	59934	Gynaecomastia	Breast_disorders_NEC	Breast_disorders	Reproductive_system_and_breast_disorders
Gynaecomastia	Q86TJ2	26099	Gynaecomastia	Breast_disorders_NEC	Breast_disorders	Reproductive_system_and_breast_disorders
Gynaecomastia	P21817	19832	Gynaecomastia	Breast_disorders_NEC	Breast_disorders	Reproductive_system_and_breast_disorders
Gynaecomastia	P31213	128785	Gynaecomastia	Breast_disorders_NEC	Breast_disorders	Reproductive_system_and_breast_disorders
Gynaecomastia	P62701	12851	Gynaecomastia	Breast_disorders_NEC	Breast_disorders	Reproductive_system_and_breast_disorders
Gynaecomastia	Q14524	18291	Gynaecomastia	Breast_disorders_NEC	Breast_disorders	Reproductive_system_and_breast_disorders
Gynaecomastia	Q9H1D0	63056	Gynaecomastia	Breast_disorders_NEC	Breast_disorders	Reproductive_system_and_breast_disorders
Gynaecomastia	Q14643	26005	Gynaecomastia	Breast_disorders_NEC	Breast_disorders	Reproductive_system_and_breast_disorders
Gynaecomastia	P98161	67045	Gynaecomastia	Breast_disorders_NEC	Breast_disorders	Reproductive_system_and_breast_disorders
Gynaecomastia	O75762	4865	Gynaecomastia	Breast_disorders_NEC	Breast_disorders	Reproductive_system_and_breast_disorders
Gynaecomastia	Q13563	16075	Gynaecomastia	Breast_disorders_NEC	Breast_disorders	Reproductive_system_and_breast_disorders
Gynaecomastia	Q14573	5758	Gynaecomastia	Breast_disorders_NEC	Breast_disorders	Reproductive_system_and_breast_disorders
Gynaecomastia	Q92736	6953	Gynaecomastia	Breast_disorders_NEC	Breast_disorders	Reproductive_system_and_breast_disorders
Gynaecomastia	Q15139	13918	Gynaecomastia	Breast_disorders_NEC	Breast_disorders	Reproductive_system_and_breast_disorders
Gynaecomastia	P35499	68424	Gynaecomastia	Breast_disorders_NEC	Breast_disorders	Reproductive_system_and_breast_disorders
Gynaecomastia	P23975	66463	Gynaecomastia	Breast_disorders_NEC	Breast_disorders	Reproductive_system_and_breast_disorders
Gynaecomastia	P35367	66564	Gynaecomastia	Breast_disorders_NEC	Breast_disorders	Reproductive_system_and_breast_disorders
Gynaecomastia	Q07699	67308	Gynaecomastia	Breast_disorders_NEC	Breast_disorders	Reproductive_system_and_breast_disorders
Gynaecomastia	Q9Y2Z9	35647	Gynaecomastia	Breast_disorders_NEC	Breast_disorders	Reproductive_system_and_breast_disorders
Gynaecomastia	Q01118	14782	Gynaecomastia	Breast_disorders_NEC	Breast_disorders	Reproductive_system_and_breast_disorders
Gynaecomastia	P18405	81905	Gynaecomastia	Breast_disorders_NEC	Breast_disorders	Reproductive_system_and_breast_disorders
Gynaecomastia	Q9NY46	64563	Gynaecomastia	Breast_disorders_NEC	Breast_disorders	Reproductive_system_and_breast_disorders
Haemorrhagic_diathesis	P08514	64952	Haemorrhagic_diathesis	Bleeding_tendencies	Coagulopathies_and_bleeding_diatheses_(excl_thrombocytopenic)	Blood_and_lymphatic_system_disorders
Haemorrhagic_diathesis	P00740	60879	Haemorrhagic_diathesis	Bleeding_tendencies	Coagulopathies_and_bleeding_diatheses_(excl_thrombocytopenic)	Blood_and_lymphatic_system_disorders
Haemorrhagic_diathesis	P14770	14111	Haemorrhagic_diathesis	Bleeding_tendencies	Coagulopathies_and_bleeding_diatheses_(excl_thrombocytopenic)	Blood_and_lymphatic_system_disorders
Hepatitis	P24534	7571	Hepatitis	Hepatocellular_damage_and_hepatitis_NEC	Hepatic_and_hepatobiliary_disorders	Hepatobiliary_disorders
Hepatitis	Q8IWT1	65347	Hepatitis	Hepatocellular_damage_and_hepatitis_NEC	Hepatic_and_hepatobiliary_disorders	Hepatobiliary_disorders
Hepatitis	Q9NY72	65583	Hepatitis	Hepatocellular_damage_and_hepatitis_NEC	Hepatic_and_hepatobiliary_disorders	Hepatobiliary_disorders
Hepatitis	P02741	49240	Hepatitis	Hepatocellular_damage_and_hepatitis_NEC	Hepatic_and_hepatobiliary_disorders	Hepatobiliary_disorders
Hepatitis	P21917	59953	Hepatitis	Hepatocellular_damage_and_hepatitis_NEC	Hepatic_and_hepatobiliary_disorders	Hepatobiliary_disorders
Hepatitis	P13945	8611	Hepatitis	Hepatocellular_damage_and_hepatitis_NEC	Hepatic_and_hepatobiliary_disorders	Hepatobiliary_disorders
Hepatitis	P03372	14636	Hepatitis	Hepatocellular_damage_and_hepatitis_NEC	Hepatic_and_hepatobiliary_disorders	Hepatobiliary_disorders
Hepatitis	P14416	59942	Hepatitis	Hepatocellular_damage_and_hepatitis_NEC	Hepatic_and_hepatobiliary_disorders	Hepatobiliary_disorders
Hepatitis	P62937	17592	Hepatitis	Hepatocellular_damage_and_hepatitis_NEC	Hepatic_and_hepatobiliary_disorders	Hepatobiliary_disorders
Hepatitis	P21675	18984	Hepatitis	Hepatocellular_damage_and_hepatitis_NEC	Hepatic_and_hepatobiliary_disorders	Hepatobiliary_disorders
Hepatitis	Q9BZL6	64649	Hepatitis	Hepatocellular_damage_and_hepatitis_NEC	Hepatic_and_hepatobiliary_disorders	Hepatobiliary_disorders
Hepatitis	P07550	8602	Hepatitis	Hepatocellular_damage_and_hepatitis_NEC	Hepatic_and_hepatobiliary_disorders	Hepatobiliary_disorders
Hepatitis	P08588	8592	Hepatitis	Hepatocellular_damage_and_hepatitis_NEC	Hepatic_and_hepatobiliary_disorders	Hepatobiliary_disorders
Hepatitis	P20648	20971	Hepatitis	Hepatocellular_damage_and_hepatitis_NEC	Hepatic_and_hepatobiliary_disorders	Hepatobiliary_disorders
Hepatitis	Q07869	19279	Hepatitis	Hepatocellular_damage_and_hepatitis_NEC	Hepatic_and_hepatobiliary_disorders	Hepatobiliary_disorders
Hepatitis	P10145	13477	Hepatitis	Hepatocellular_damage_and_hepatitis_NEC	Hepatic_and_hepatobiliary_disorders	Hepatobiliary_disorders
Hepatitis	P30556	9691	Hepatitis	Hepatocellular_damage_and_hepatitis_NEC	Hepatic_and_hepatobiliary_disorders	Hepatobiliary_disorders
Hepatitis	P62701	12851	Hepatitis	Hepatocellular_damage_and_hepatitis_NEC	Hepatic_and_hepatobiliary_disorders	Hepatobiliary_disorders
Hepatitis	Q14524	18291	Hepatitis	Hepatocellular_damage_and_hepatitis_NEC	Hepatic_and_hepatobiliary_disorders	Hepatobiliary_disorders
Hepatitis	Q9H1D0	63056	Hepatitis	Hepatocellular_damage_and_hepatitis_NEC	Hepatic_and_hepatobiliary_disorders	Hepatobiliary_disorders
Hepatitis	Q14643	26005	Hepatitis	Hepatocellular_damage_and_hepatitis_NEC	Hepatic_and_hepatobiliary_disorders	Hepatobiliary_disorders
Hepatitis	P98161	67045	Hepatitis	Hepatocellular_damage_and_hepatitis_NEC	Hepatic_and_hepatobiliary_disorders	Hepatobiliary_disorders
Hepatitis	O75762	4865	Hepatitis	Hepatocellular_damage_and_hepatitis_NEC	Hepatic_and_hepatobiliary_disorders	Hepatobiliary_disorders
Hepatitis	Q13563	16075	Hepatitis	Hepatocellular_damage_and_hepatitis_NEC	Hepatic_and_hepatobiliary_disorders	Hepatobiliary_disorders
Hepatitis	P61586	6366	Hepatitis	Hepatocellular_damage_and_hepatitis_NEC	Hepatic_and_hepatobiliary_disorders	Hepatobiliary_disorders
Hepatitis	P10721	64056	Hepatitis	Hepatocellular_damage_and_hepatitis_NEC	Hepatic_and_hepatobiliary_disorders	Hepatobiliary_disorders
Hepatitis	P15692	6770	Hepatitis	Hepatocellular_damage_and_hepatitis_NEC	Hepatic_and_hepatobiliary_disorders	Hepatobiliary_disorders
Hepatitis	P63000	13544	Hepatitis	Hepatocellular_damage_and_hepatitis_NEC	Hepatic_and_hepatobiliary_disorders	Hepatobiliary_disorders
Hepatitis	P13500	38273	Hepatitis	Hepatocellular_damage_and_hepatitis_NEC	Hepatic_and_hepatobiliary_disorders	Hepatobiliary_disorders
Hepatitis	Q14573	5758	Hepatitis	Hepatocellular_damage_and_hepatitis_NEC	Hepatic_and_hepatobiliary_disorders	Hepatobiliary_disorders
Hepatitis	Q15139	13918	Hepatitis	Hepatocellular_damage_and_hepatitis_NEC	Hepatic_and_hepatobiliary_disorders	Hepatobiliary_disorders
Hepatitis	P35499	68424	Hepatitis	Hepatocellular_damage_and_hepatitis_NEC	Hepatic_and_hepatobiliary_disorders	Hepatobiliary_disorders
Hepatitis	P35498	66662	Hepatitis	Hepatocellular_damage_and_hepatitis_NEC	Hepatic_and_hepatobiliary_disorders	Hepatobiliary_disorders
Hepatitis	Q12809	61990	Hepatitis	Hepatocellular_damage_and_hepatitis_NEC	Hepatic_and_hepatobiliary_disorders	Hepatobiliary_disorders
Hepatitis	P11388	31795	Hepatitis	Hepatocellular_damage_and_hepatitis_NEC	Hepatic_and_hepatobiliary_disorders	Hepatobiliary_disorders
Hepatitis	Q07699	67308	Hepatitis	Hepatocellular_damage_and_hepatitis_NEC	Hepatic_and_hepatobiliary_disorders	Hepatobiliary_disorders
Hepatitis	Q01118	14782	Hepatitis	Hepatocellular_damage_and_hepatitis_NEC	Hepatic_and_hepatobiliary_disorders	Hepatobiliary_disorders
Hepatitis	Q9NY46	64563	Hepatitis	Hepatocellular_damage_and_hepatitis_NEC	Hepatic_and_hepatobiliary_disorders	Hepatobiliary_disorders
Hepatitis	P12821	4912	Hepatitis	Hepatocellular_damage_and_hepatitis_NEC	Hepatic_and_hepatobiliary_disorders	Hepatobiliary_disorders
Hepatitis_toxic	P42684	3600	Hepatitis_toxic	Hepatocellular_damage_and_hepatitis_NEC	Hepatic_and_hepatobiliary_disorders	Hepatobiliary_disorders
Hepatitis_toxic	P07948	13896	Hepatitis_toxic	Hepatocellular_damage_and_hepatitis_NEC	Hepatic_and_hepatobiliary_disorders	Hepatobiliary_disorders
Hepatomegaly	P04150	29101	Hepatomegaly	Hepatobiliary_signs_and_symptoms	Hepatic_and_hepatobiliary_disorders	Hepatobiliary_disorders
Hirsutism	P24534	7571	Hirsutism	Hypertrichoses	Skin_appendage_conditions	Skin_and_subcutaneous_tissue_disorders
Hirsutism	Q9H227	65117	Hirsutism	Hypertrichoses	Skin_appendage_conditions	Skin_and_subcutaneous_tissue_disorders
Hirsutism	Q8IWT1	65347	Hirsutism	Hypertrichoses	Skin_appendage_conditions	Skin_and_subcutaneous_tissue_disorders
Hirsutism	Q9NY72	65583	Hirsutism	Hypertrichoses	Skin_appendage_conditions	Skin_and_subcutaneous_tissue_disorders
Hirsutism	P10588	52086	Hirsutism	Hypertrichoses	Skin_appendage_conditions	Skin_and_subcutaneous_tissue_disorders
Hirsutism	P11474	33251	Hirsutism	Hypertrichoses	Skin_appendage_conditions	Skin_and_subcutaneous_tissue_disorders
Hirsutism	P04083	6035	Hirsutism	Hypertrichoses	Skin_appendage_conditions	Skin_and_subcutaneous_tissue_disorders
Hirsutism	P08842	66077	Hirsutism	Hypertrichoses	Skin_appendage_conditions	Skin_and_subcutaneous_tissue_disorders
Hirsutism	P03372	14636	Hirsutism	Hypertrichoses	Skin_appendage_conditions	Skin_and_subcutaneous_tissue_disorders
Hirsutism	Q15424	14617	Hirsutism	Hypertrichoses	Skin_appendage_conditions	Skin_and_subcutaneous_tissue_disorders
Hirsutism	P49116	13793	Hirsutism	Hypertrichoses	Skin_appendage_conditions	Skin_and_subcutaneous_tissue_disorders
Hirsutism	Q14151	14610	Hirsutism	Hypertrichoses	Skin_appendage_conditions	Skin_and_subcutaneous_tissue_disorders
Hirsutism	P04278	58943	Hirsutism	Hypertrichoses	Skin_appendage_conditions	Skin_and_subcutaneous_tissue_disorders
Hirsutism	P05093	48093	Hirsutism	Hypertrichoses	Skin_appendage_conditions	Skin_and_subcutaneous_tissue_disorders
Hirsutism	P22059	19470	Hirsutism	Hypertrichoses	Skin_appendage_conditions	Skin_and_subcutaneous_tissue_disorders
Hirsutism	Q8N2R0	19030	Hirsutism	Hypertrichoses	Skin_appendage_conditions	Skin_and_subcutaneous_tissue_disorders
Hirsutism	P31213	128785	Hirsutism	Hypertrichoses	Skin_appendage_conditions	Skin_and_subcutaneous_tissue_disorders
Hirsutism	Q14524	18291	Hirsutism	Hypertrichoses	Skin_appendage_conditions	Skin_and_subcutaneous_tissue_disorders
Hirsutism	P04150	29101	Hirsutism	Hypertrichoses	Skin_appendage_conditions	Skin_and_subcutaneous_tissue_disorders
Hirsutism	P62508	19716	Hirsutism	Hypertrichoses	Skin_appendage_conditions	Skin_and_subcutaneous_tissue_disorders
Hirsutism	P35499	68424	Hirsutism	Hypertrichoses	Skin_appendage_conditions	Skin_and_subcutaneous_tissue_disorders
Hirsutism	P08235	13796	Hirsutism	Hypertrichoses	Skin_appendage_conditions	Skin_and_subcutaneous_tissue_disorders
Hirsutism	Q07699	67308	Hirsutism	Hypertrichoses	Skin_appendage_conditions	Skin_and_subcutaneous_tissue_disorders
Hirsutism	P14061	57409	Hirsutism	Hypertrichoses	Skin_appendage_conditions	Skin_and_subcutaneous_tissue_disorders
Hirsutism	P08185	36608	Hirsutism	Hypertrichoses	Skin_appendage_conditions	Skin_and_subcutaneous_tissue_disorders
Hirsutism	Q01118	14782	Hirsutism	Hypertrichoses	Skin_appendage_conditions	Skin_and_subcutaneous_tissue_disorders
Hirsutism	P18405	81905	Hirsutism	Hypertrichoses	Skin_appendage_conditions	Skin_and_subcutaneous_tissue_disorders
Hirsutism	Q92731	50933	Hirsutism	Hypertrichoses	Skin_appendage_conditions	Skin_and_subcutaneous_tissue_disorders
Hirsutism	Q9NY46	64563	Hirsutism	Hypertrichoses	Skin_appendage_conditions	Skin_and_subcutaneous_tissue_disorders
Hirsutism	P12821	4912	Hirsutism	Hypertrichoses	Skin_appendage_conditions	Skin_and_subcutaneous_tissue_disorders
Hyperacusis	P24534	7571	Hyperacusis	Hyperacusia	Hearing_disorders	Ear_and_labyrinth_disorders
Hyperacusis	Q8IWT1	65347	Hyperacusis	Hyperacusia	Hearing_disorders	Ear_and_labyrinth_disorders
Hyperacusis	Q9NY72	65583	Hyperacusis	Hyperacusia	Hearing_disorders	Ear_and_labyrinth_disorders
Hyperacusis	Q07699	67308	Hyperacusis	Hyperacusia	Hearing_disorders	Ear_and_labyrinth_disorders
Hyperacusis	Q01118	14782	Hyperacusis	Hyperacusia	Hearing_disorders	Ear_and_labyrinth_disorders
Hyperacusis	P35499	68424	Hyperacusis	Hyperacusia	Hearing_disorders	Ear_and_labyrinth_disorders
Hyperacusis	Q9NY46	64563	Hyperacusis	Hyperacusia	Hearing_disorders	Ear_and_labyrinth_disorders
Hyperacusis	Q14524	18291	Hyperacusis	Hyperacusia	Hearing_disorders	Ear_and_labyrinth_disorders
Hyperaemia	P43088	43879	Hyperaemia	Non-site_specific_vascular_disorders_NEC	Vascular_disorders_NEC	Vascular_disorders
Hypercoagulation	P42898	20195	Hypercoagulation	Coagulopathies	Coagulopathies_and_bleeding_diatheses_(excl_thrombocytopenic)	Blood_and_lymphatic_system_disorders
Hypernatraemia	Q9H227	65117	Hypernatraemia	Sodium_imbalance	Electrolyte_and_fluid_balance_conditions	Metabolism_and_nutrition_disorders
Hypernatraemia	O15146	14420	Hypernatraemia	Sodium_imbalance	Electrolyte_and_fluid_balance_conditions	Metabolism_and_nutrition_disorders
Hypernatraemia	P10276	48641	Hypernatraemia	Sodium_imbalance	Electrolyte_and_fluid_balance_conditions	Metabolism_and_nutrition_disorders
Hypernatraemia	P04083	6035	Hypernatraemia	Sodium_imbalance	Electrolyte_and_fluid_balance_conditions	Metabolism_and_nutrition_disorders
Hypernatraemia	P08842	66077	Hypernatraemia	Sodium_imbalance	Electrolyte_and_fluid_balance_conditions	Metabolism_and_nutrition_disorders
Hypernatraemia	Q9NZT2	62165	Hypernatraemia	Sodium_imbalance	Electrolyte_and_fluid_balance_conditions	Metabolism_and_nutrition_disorders
Hypernatraemia	P03372	14636	Hypernatraemia	Sodium_imbalance	Electrolyte_and_fluid_balance_conditions	Metabolism_and_nutrition_disorders
Hypernatraemia	P48061	69705	Hypernatraemia	Sodium_imbalance	Electrolyte_and_fluid_balance_conditions	Metabolism_and_nutrition_disorders
Hypernatraemia	P48443	36352	Hypernatraemia	Sodium_imbalance	Electrolyte_and_fluid_balance_conditions	Metabolism_and_nutrition_disorders
Hypernatraemia	P04278	58943	Hypernatraemia	Sodium_imbalance	Electrolyte_and_fluid_balance_conditions	Metabolism_and_nutrition_disorders
Hypernatraemia	P19793	28385	Hypernatraemia	Sodium_imbalance	Electrolyte_and_fluid_balance_conditions	Metabolism_and_nutrition_disorders
Hypernatraemia	P14324	62018	Hypernatraemia	Sodium_imbalance	Electrolyte_and_fluid_balance_conditions	Metabolism_and_nutrition_disorders
Hypernatraemia	P04150	29101	Hypernatraemia	Sodium_imbalance	Electrolyte_and_fluid_balance_conditions	Metabolism_and_nutrition_disorders
Hypernatraemia	P08235	13796	Hypernatraemia	Sodium_imbalance	Electrolyte_and_fluid_balance_conditions	Metabolism_and_nutrition_disorders
Hypernatraemia	P28702	28496	Hypernatraemia	Sodium_imbalance	Electrolyte_and_fluid_balance_conditions	Metabolism_and_nutrition_disorders
Hypernatraemia	P01019	12280	Hypernatraemia	Sodium_imbalance	Electrolyte_and_fluid_balance_conditions	Metabolism_and_nutrition_disorders
Hypernatraemia	P10826	5706	Hypernatraemia	Sodium_imbalance	Electrolyte_and_fluid_balance_conditions	Metabolism_and_nutrition_disorders
Hypernatraemia	P08185	36608	Hypernatraemia	Sodium_imbalance	Electrolyte_and_fluid_balance_conditions	Metabolism_and_nutrition_disorders
Hypernatraemia	P19838	6119	Hypernatraemia	Sodium_imbalance	Electrolyte_and_fluid_balance_conditions	Metabolism_and_nutrition_disorders
Hypernatraemia	P12821	4912	Hypernatraemia	Sodium_imbalance	Electrolyte_and_fluid_balance_conditions	Metabolism_and_nutrition_disorders
Hyperparathyroidism	P41180	35791	Hyperparathyroidism	Hyperparathyroid_disorders	Parathyroid_gland_disorders	Endocrine_disorders
Hyperparathyroidism	P11473	23820	Hyperparathyroidism	Hyperparathyroid_disorders	Parathyroid_gland_disorders	Endocrine_disorders
Hypersensitivity	Q9H1D0	63056	Hypersensitivity	Allergic_conditions_NEC	Allergic_conditions	Immune_system_disorders
Hypersensitivity	P35498	66662	Hypersensitivity	Allergic_conditions_NEC	Allergic_conditions	Immune_system_disorders
Hypersensitivity	Q9BZL6	64649	Hypersensitivity	Allergic_conditions_NEC	Allergic_conditions	Immune_system_disorders
Hypersensitivity	Q14643	26005	Hypersensitivity	Allergic_conditions_NEC	Allergic_conditions	Immune_system_disorders
Hypersensitivity	P30556	9691	Hypersensitivity	Allergic_conditions_NEC	Allergic_conditions	Immune_system_disorders
Hypersensitivity	P98161	67045	Hypersensitivity	Allergic_conditions_NEC	Allergic_conditions	Immune_system_disorders
Hypersensitivity	O75762	4865	Hypersensitivity	Allergic_conditions_NEC	Allergic_conditions	Immune_system_disorders
Hypersensitivity	Q13563	16075	Hypersensitivity	Allergic_conditions_NEC	Allergic_conditions	Immune_system_disorders
Hypersensitivity	P20648	20971	Hypersensitivity	Allergic_conditions_NEC	Allergic_conditions	Immune_system_disorders
Hypersensitivity	P21917	59953	Hypersensitivity	Allergic_conditions_NEC	Allergic_conditions	Immune_system_disorders
Hypersensitivity	P15692	6770	Hypersensitivity	Allergic_conditions_NEC	Allergic_conditions	Immune_system_disorders
Hypersensitivity	P62937	17592	Hypersensitivity	Allergic_conditions_NEC	Allergic_conditions	Immune_system_disorders
Hypersensitivity	Q14573	5758	Hypersensitivity	Allergic_conditions_NEC	Allergic_conditions	Immune_system_disorders
Hypersensitivity	Q15139	13918	Hypersensitivity	Allergic_conditions_NEC	Allergic_conditions	Immune_system_disorders
Hypersensitivity	P62701	12851	Hypersensitivity	Allergic_conditions_NEC	Allergic_conditions	Immune_system_disorders
Hypersensitivity	P12821	4912	Hypersensitivity	Allergic_conditions_NEC	Allergic_conditions	Immune_system_disorders
Hypertrophic_cardiomyopathy	P04150	29101	Hypertrophic_cardiomyopathy	Cardiac_septal_defects_congenital	Cardiac_and_vascular_disorders_congenital	Congenital,_familial_and_genetic_disorders
Hyperuricaemia	P21918	59957	Hyperuricaemia	Disorders_of_purine_metabolism	Purine_and_pyrimidine_metabolism_disorders	Metabolism_and_nutrition_disorders
Hyperuricaemia	P21917	59953	Hyperuricaemia	Disorders_of_purine_metabolism	Purine_and_pyrimidine_metabolism_disorders	Metabolism_and_nutrition_disorders
Hyperuricaemia	Q9Y237	18933	Hyperuricaemia	Disorders_of_purine_metabolism	Purine_and_pyrimidine_metabolism_disorders	Metabolism_and_nutrition_disorders
Hyperuricaemia	P04083	6035	Hyperuricaemia	Disorders_of_purine_metabolism	Purine_and_pyrimidine_metabolism_disorders	Metabolism_and_nutrition_disorders
Hyperuricaemia	P14416	59942	Hyperuricaemia	Disorders_of_purine_metabolism	Purine_and_pyrimidine_metabolism_disorders	Metabolism_and_nutrition_disorders
Hyperuricaemia	Q9Y3C6	22648	Hyperuricaemia	Disorders_of_purine_metabolism	Purine_and_pyrimidine_metabolism_disorders	Metabolism_and_nutrition_disorders
Hyperuricaemia	P62937	17592	Hyperuricaemia	Disorders_of_purine_metabolism	Purine_and_pyrimidine_metabolism_disorders	Metabolism_and_nutrition_disorders
Hyperuricaemia	Q02790	42486	Hyperuricaemia	Disorders_of_purine_metabolism	Purine_and_pyrimidine_metabolism_disorders	Metabolism_and_nutrition_disorders
Hyperuricaemia	Q9H2H8	28005	Hyperuricaemia	Disorders_of_purine_metabolism	Purine_and_pyrimidine_metabolism_disorders	Metabolism_and_nutrition_disorders
Hyperuricaemia	Q9UNP9	13991	Hyperuricaemia	Disorders_of_purine_metabolism	Purine_and_pyrimidine_metabolism_disorders	Metabolism_and_nutrition_disorders
Hyperuricaemia	P35218	33208	Hyperuricaemia	Disorders_of_purine_metabolism	Purine_and_pyrimidine_metabolism_disorders	Metabolism_and_nutrition_disorders
Hyperuricaemia	P35462	59949	Hyperuricaemia	Disorders_of_purine_metabolism	Purine_and_pyrimidine_metabolism_disorders	Metabolism_and_nutrition_disorders
Hyperuricaemia	P43166	33232	Hyperuricaemia	Disorders_of_purine_metabolism	Purine_and_pyrimidine_metabolism_disorders	Metabolism_and_nutrition_disorders
Hyperuricaemia	P00492	46754	Hyperuricaemia	Disorders_of_purine_metabolism	Purine_and_pyrimidine_metabolism_disorders	Metabolism_and_nutrition_disorders
Hyperuricaemia	P20648	20971	Hyperuricaemia	Disorders_of_purine_metabolism	Purine_and_pyrimidine_metabolism_disorders	Metabolism_and_nutrition_disorders
Hyperuricaemia	P21728	59934	Hyperuricaemia	Disorders_of_purine_metabolism	Purine_and_pyrimidine_metabolism_disorders	Metabolism_and_nutrition_disorders
Hyperuricaemia	P00915	33145	Hyperuricaemia	Disorders_of_purine_metabolism	Purine_and_pyrimidine_metabolism_disorders	Metabolism_and_nutrition_disorders
Hyperuricaemia	Q9Y2D0	33213	Hyperuricaemia	Disorders_of_purine_metabolism	Purine_and_pyrimidine_metabolism_disorders	Metabolism_and_nutrition_disorders
Hyperuricaemia	P22748	33200	Hyperuricaemia	Disorders_of_purine_metabolism	Purine_and_pyrimidine_metabolism_disorders	Metabolism_and_nutrition_disorders
Hyperuricaemia	P30556	9691	Hyperuricaemia	Disorders_of_purine_metabolism	Purine_and_pyrimidine_metabolism_disorders	Metabolism_and_nutrition_disorders
Hyperuricaemia	O95302	16153	Hyperuricaemia	Disorders_of_purine_metabolism	Purine_and_pyrimidine_metabolism_disorders	Metabolism_and_nutrition_disorders
Hyperuricaemia	O75344	45290	Hyperuricaemia	Disorders_of_purine_metabolism	Purine_and_pyrimidine_metabolism_disorders	Metabolism_and_nutrition_disorders
Hyperuricaemia	Q14318	15929	Hyperuricaemia	Disorders_of_purine_metabolism	Purine_and_pyrimidine_metabolism_disorders	Metabolism_and_nutrition_disorders
Hyperuricaemia	Q08752	35603	Hyperuricaemia	Disorders_of_purine_metabolism	Purine_and_pyrimidine_metabolism_disorders	Metabolism_and_nutrition_disorders
Hyperuricaemia	Q8WTZ4		Hyperuricaemia	Disorders_of_purine_metabolism	Purine_and_pyrimidine_metabolism_disorders	Metabolism_and_nutrition_disorders
Hyperuricaemia	P23284	6791	Hyperuricaemia	Disorders_of_purine_metabolism	Purine_and_pyrimidine_metabolism_disorders	Metabolism_and_nutrition_disorders
Hyperuricaemia	P15692	6770	Hyperuricaemia	Disorders_of_purine_metabolism	Purine_and_pyrimidine_metabolism_disorders	Metabolism_and_nutrition_disorders
Hyperuricaemia	Q13356	32240	Hyperuricaemia	Disorders_of_purine_metabolism	Purine_and_pyrimidine_metabolism_disorders	Metabolism_and_nutrition_disorders
Hyperuricaemia	P45877	63606	Hyperuricaemia	Disorders_of_purine_metabolism	Purine_and_pyrimidine_metabolism_disorders	Metabolism_and_nutrition_disorders
Hyperuricaemia	Q13451	17580	Hyperuricaemia	Disorders_of_purine_metabolism	Purine_and_pyrimidine_metabolism_disorders	Metabolism_and_nutrition_disorders
Hyperuricaemia	P26885	58940	Hyperuricaemia	Disorders_of_purine_metabolism	Purine_and_pyrimidine_metabolism_disorders	Metabolism_and_nutrition_disorders
Hyperuricaemia	P00918	33167	Hyperuricaemia	Disorders_of_purine_metabolism	Purine_and_pyrimidine_metabolism_disorders	Metabolism_and_nutrition_disorders
Hyperuricaemia	Q00688	62729	Hyperuricaemia	Disorders_of_purine_metabolism	Purine_and_pyrimidine_metabolism_disorders	Metabolism_and_nutrition_disorders
Hyperuricaemia	P21802	12961	Hyperuricaemia	Disorders_of_purine_metabolism	Purine_and_pyrimidine_metabolism_disorders	Metabolism_and_nutrition_disorders
Hyperuricaemia	P11388	31795	Hyperuricaemia	Disorders_of_purine_metabolism	Purine_and_pyrimidine_metabolism_disorders	Metabolism_and_nutrition_disorders
Hyperuricaemia	Q9Y680	21130	Hyperuricaemia	Disorders_of_purine_metabolism	Purine_and_pyrimidine_metabolism_disorders	Metabolism_and_nutrition_disorders
Hyperuricaemia	P68106	50788	Hyperuricaemia	Disorders_of_purine_metabolism	Purine_and_pyrimidine_metabolism_disorders	Metabolism_and_nutrition_disorders
Hyperuricaemia	P30405	51465	Hyperuricaemia	Disorders_of_purine_metabolism	Purine_and_pyrimidine_metabolism_disorders	Metabolism_and_nutrition_disorders
Hyperuricaemia	Q13427	6260	Hyperuricaemia	Disorders_of_purine_metabolism	Purine_and_pyrimidine_metabolism_disorders	Metabolism_and_nutrition_disorders
Hyperuricaemia	Q13526	19566	Hyperuricaemia	Disorders_of_purine_metabolism	Purine_and_pyrimidine_metabolism_disorders	Metabolism_and_nutrition_disorders
Hypoacusis	P22748	33200	Hypoacusis	Hearing_losses	Hearing_disorders	Ear_and_labyrinth_disorders
Hypogonadism	P30968	57160	Hypogonadism	Endocrine_abnormalities_of_gonadal_function_NEC	Endocrine_disorders_of_gonadal_function	Endocrine_disorders
Ichthyosis	O75342	66733	Ichthyosis	Skin_and_subcutaneous_tissue_disorders_congenital_NEC	Skin_and_subcutaneous_tissue_disorders_congenital	Congenital,_familial_and_genetic_disorders
Infarction	P35968	14637	Infarction	Non-site_specific_necrosis_and_vascular_insufficiency_NEC	Arteriosclerosis,_stenosis,_vascular_insufficiency_and_necrosis	Vascular_disorders
Infarction	Q9BUB5	51709	Infarction	Non-site_specific_necrosis_and_vascular_insufficiency_NEC	Arteriosclerosis,_stenosis,_vascular_insufficiency_and_necrosis	Vascular_disorders
Infarction	P15056	14706	Infarction	Non-site_specific_necrosis_and_vascular_insufficiency_NEC	Arteriosclerosis,_stenosis,_vascular_insufficiency_and_necrosis	Vascular_disorders
Ischaemia	P07550	8602	Ischaemia	Non-site_specific_necrosis_and_vascular_insufficiency_NEC	Arteriosclerosis,_stenosis,_vascular_insufficiency_and_necrosis	Vascular_disorders
Ischaemia	P13945	8611	Ischaemia	Non-site_specific_necrosis_and_vascular_insufficiency_NEC	Arteriosclerosis,_stenosis,_vascular_insufficiency_and_necrosis	Vascular_disorders
Ischaemia	P08588	8592	Ischaemia	Non-site_specific_necrosis_and_vascular_insufficiency_NEC	Arteriosclerosis,_stenosis,_vascular_insufficiency_and_necrosis	Vascular_disorders
Jaundice	P21918	59957	Jaundice	Cholestasis_and_jaundice	Hepatic_and_hepatobiliary_disorders	Hepatobiliary_disorders
Jaundice	P24534	7571	Jaundice	Cholestasis_and_jaundice	Hepatic_and_hepatobiliary_disorders	Hepatobiliary_disorders
Jaundice	Q8IWT1	65347	Jaundice	Cholestasis_and_jaundice	Hepatic_and_hepatobiliary_disorders	Hepatobiliary_disorders
Jaundice	Q9NY72	65583	Jaundice	Cholestasis_and_jaundice	Hepatic_and_hepatobiliary_disorders	Hepatobiliary_disorders
Jaundice	P02741	49240	Jaundice	Cholestasis_and_jaundice	Hepatic_and_hepatobiliary_disorders	Hepatobiliary_disorders
Jaundice	P21917	59953	Jaundice	Cholestasis_and_jaundice	Hepatic_and_hepatobiliary_disorders	Hepatobiliary_disorders
Jaundice	P04083	6035	Jaundice	Cholestasis_and_jaundice	Hepatic_and_hepatobiliary_disorders	Hepatobiliary_disorders
Jaundice	P14416	59942	Jaundice	Cholestasis_and_jaundice	Hepatic_and_hepatobiliary_disorders	Hepatobiliary_disorders
Jaundice	P35462	59949	Jaundice	Cholestasis_and_jaundice	Hepatic_and_hepatobiliary_disorders	Hepatobiliary_disorders
Jaundice	Q16647	66524	Jaundice	Cholestasis_and_jaundice	Hepatic_and_hepatobiliary_disorders	Hepatobiliary_disorders
Jaundice	P20648	20971	Jaundice	Cholestasis_and_jaundice	Hepatic_and_hepatobiliary_disorders	Hepatobiliary_disorders
Jaundice	P21728	59934	Jaundice	Cholestasis_and_jaundice	Hepatic_and_hepatobiliary_disorders	Hepatobiliary_disorders
Jaundice	Q86TJ2	26099	Jaundice	Cholestasis_and_jaundice	Hepatic_and_hepatobiliary_disorders	Hepatobiliary_disorders
Jaundice	P30556	9691	Jaundice	Cholestasis_and_jaundice	Hepatic_and_hepatobiliary_disorders	Hepatobiliary_disorders
Jaundice	Q14524	18291	Jaundice	Cholestasis_and_jaundice	Hepatic_and_hepatobiliary_disorders	Hepatobiliary_disorders
Jaundice	P15692	6770	Jaundice	Cholestasis_and_jaundice	Hepatic_and_hepatobiliary_disorders	Hepatobiliary_disorders
Jaundice	P35499	68424	Jaundice	Cholestasis_and_jaundice	Hepatic_and_hepatobiliary_disorders	Hepatobiliary_disorders
Jaundice	P35367	66564	Jaundice	Cholestasis_and_jaundice	Hepatic_and_hepatobiliary_disorders	Hepatobiliary_disorders
Jaundice	P35498	66662	Jaundice	Cholestasis_and_jaundice	Hepatic_and_hepatobiliary_disorders	Hepatobiliary_disorders
Jaundice	P11388	31795	Jaundice	Cholestasis_and_jaundice	Hepatic_and_hepatobiliary_disorders	Hepatobiliary_disorders
Jaundice	Q07699	67308	Jaundice	Cholestasis_and_jaundice	Hepatic_and_hepatobiliary_disorders	Hepatobiliary_disorders
Jaundice	Q9Y2Z9	35647	Jaundice	Cholestasis_and_jaundice	Hepatic_and_hepatobiliary_disorders	Hepatobiliary_disorders
Jaundice	Q01118	14782	Jaundice	Cholestasis_and_jaundice	Hepatic_and_hepatobiliary_disorders	Hepatobiliary_disorders
Jaundice	Q9NY46	64563	Jaundice	Cholestasis_and_jaundice	Hepatic_and_hepatobiliary_disorders	Hepatobiliary_disorders
Malnutrition	P30530	66028	Malnutrition	General_nutritional_disorders_NEC	Appetite_and_general_nutritional_disorders	Metabolism_and_nutrition_disorders
Malnutrition	P35968	14637	Malnutrition	General_nutritional_disorders_NEC	Appetite_and_general_nutritional_disorders	Metabolism_and_nutrition_disorders
Malnutrition	P07948	13896	Malnutrition	General_nutritional_disorders_NEC	Appetite_and_general_nutritional_disorders	Metabolism_and_nutrition_disorders
Malnutrition	P21802	12961	Malnutrition	General_nutritional_disorders_NEC	Appetite_and_general_nutritional_disorders	Metabolism_and_nutrition_disorders
Malnutrition	P00533	6549	Malnutrition	General_nutritional_disorders_NEC	Appetite_and_general_nutritional_disorders	Metabolism_and_nutrition_disorders
Malnutrition	P16234	30708	Malnutrition	General_nutritional_disorders_NEC	Appetite_and_general_nutritional_disorders	Metabolism_and_nutrition_disorders
Malnutrition	P00519	3596	Malnutrition	General_nutritional_disorders_NEC	Appetite_and_general_nutritional_disorders	Metabolism_and_nutrition_disorders
Malnutrition	P06239	6064	Malnutrition	General_nutritional_disorders_NEC	Appetite_and_general_nutritional_disorders	Metabolism_and_nutrition_disorders
Malnutrition	P08842	66077	Malnutrition	General_nutritional_disorders_NEC	Appetite_and_general_nutritional_disorders	Metabolism_and_nutrition_disorders
Malnutrition	P09619	13540	Malnutrition	General_nutritional_disorders_NEC	Appetite_and_general_nutritional_disorders	Metabolism_and_nutrition_disorders
Malnutrition	P07333	13515	Malnutrition	General_nutritional_disorders_NEC	Appetite_and_general_nutritional_disorders	Metabolism_and_nutrition_disorders
Malnutrition	P42684	3600	Malnutrition	General_nutritional_disorders_NEC	Appetite_and_general_nutritional_disorders	Metabolism_and_nutrition_disorders
Malnutrition	P12931	14635	Malnutrition	General_nutritional_disorders_NEC	Appetite_and_general_nutritional_disorders	Metabolism_and_nutrition_disorders
Melaena	P35498	66662	Melaena	Non-site_specific_gastrointestinal_haemorrhages	Gastrointestinal_haemorrhages_NEC	Gastrointestinal_disorders
Melaena	P24534	7571	Melaena	Non-site_specific_gastrointestinal_haemorrhages	Gastrointestinal_haemorrhages_NEC	Gastrointestinal_disorders
Melaena	Q8IWT1	65347	Melaena	Non-site_specific_gastrointestinal_haemorrhages	Gastrointestinal_haemorrhages_NEC	Gastrointestinal_disorders
Melaena	Q9NY72	65583	Melaena	Non-site_specific_gastrointestinal_haemorrhages	Gastrointestinal_haemorrhages_NEC	Gastrointestinal_disorders
Melaena	Q15818	27725	Melaena	Non-site_specific_gastrointestinal_haemorrhages	Gastrointestinal_haemorrhages_NEC	Gastrointestinal_disorders
Melaena	P11388	31795	Melaena	Non-site_specific_gastrointestinal_haemorrhages	Gastrointestinal_haemorrhages_NEC	Gastrointestinal_disorders
Melaena	Q07699	67308	Melaena	Non-site_specific_gastrointestinal_haemorrhages	Gastrointestinal_haemorrhages_NEC	Gastrointestinal_disorders
Melaena	P02741	49240	Melaena	Non-site_specific_gastrointestinal_haemorrhages	Gastrointestinal_haemorrhages_NEC	Gastrointestinal_disorders
Melaena	P20648	20971	Melaena	Non-site_specific_gastrointestinal_haemorrhages	Gastrointestinal_haemorrhages_NEC	Gastrointestinal_disorders
Melaena	P21917	59953	Melaena	Non-site_specific_gastrointestinal_haemorrhages	Gastrointestinal_haemorrhages_NEC	Gastrointestinal_disorders
Melaena	P15692	6770	Melaena	Non-site_specific_gastrointestinal_haemorrhages	Gastrointestinal_haemorrhages_NEC	Gastrointestinal_disorders
Melaena	Q01118	14782	Melaena	Non-site_specific_gastrointestinal_haemorrhages	Gastrointestinal_haemorrhages_NEC	Gastrointestinal_disorders
Melaena	O95502	10142	Melaena	Non-site_specific_gastrointestinal_haemorrhages	Gastrointestinal_haemorrhages_NEC	Gastrointestinal_disorders
Melaena	P47972	67867	Melaena	Non-site_specific_gastrointestinal_haemorrhages	Gastrointestinal_haemorrhages_NEC	Gastrointestinal_disorders
Melaena	P35499	68424	Melaena	Non-site_specific_gastrointestinal_haemorrhages	Gastrointestinal_haemorrhages_NEC	Gastrointestinal_disorders
Melaena	Q9NY46	64563	Melaena	Non-site_specific_gastrointestinal_haemorrhages	Gastrointestinal_haemorrhages_NEC	Gastrointestinal_disorders
Melaena	P12821	4912	Melaena	Non-site_specific_gastrointestinal_haemorrhages	Gastrointestinal_haemorrhages_NEC	Gastrointestinal_disorders
Meningism	P24534	7571	Meningism	Neurological_signs_and_symptoms_NEC	Neurological_disorders_NEC	Nervous_system_disorders
Meningism	Q8IWT1	65347	Meningism	Neurological_signs_and_symptoms_NEC	Neurological_disorders_NEC	Nervous_system_disorders
Meningism	Q9NY72	65583	Meningism	Neurological_signs_and_symptoms_NEC	Neurological_disorders_NEC	Nervous_system_disorders
Meningism	Q07699	67308	Meningism	Neurological_signs_and_symptoms_NEC	Neurological_disorders_NEC	Nervous_system_disorders
Meningism	Q01118	14782	Meningism	Neurological_signs_and_symptoms_NEC	Neurological_disorders_NEC	Nervous_system_disorders
Meningism	P35499	68424	Meningism	Neurological_signs_and_symptoms_NEC	Neurological_disorders_NEC	Nervous_system_disorders
Meningism	Q9NY46	64563	Meningism	Neurological_signs_and_symptoms_NEC	Neurological_disorders_NEC	Nervous_system_disorders
Menstruation_irregular	P35367	66564	Menstruation_irregular	Menstruation_and_uterine_bleeding_NEC	Menstrual_cycle_and_uterine_bleeding_disorders	Reproductive_system_and_breast_disorders
Menstruation_irregular	P04150	29101	Menstruation_irregular	Menstruation_and_uterine_bleeding_NEC	Menstrual_cycle_and_uterine_bleeding_disorders	Reproductive_system_and_breast_disorders
Menstruation_irregular	P06401	68698	Menstruation_irregular	Menstruation_and_uterine_bleeding_NEC	Menstrual_cycle_and_uterine_bleeding_disorders	Reproductive_system_and_breast_disorders
Menstruation_irregular	P18405	81905	Menstruation_irregular	Menstruation_and_uterine_bleeding_NEC	Menstrual_cycle_and_uterine_bleeding_disorders	Reproductive_system_and_breast_disorders
Musculoskeletal_pain	P06239	6064	Musculoskeletal_pain	Musculoskeletal_and_connective_tissue_pain_and_discomfort	Musculoskeletal_and_connective_tissue_disorders_NEC	Musculoskeletal_and_connective_tissue_disorders
Musculoskeletal_pain	P15056	14706	Musculoskeletal_pain	Musculoskeletal_and_connective_tissue_pain_and_discomfort	Musculoskeletal_and_connective_tissue_disorders_NEC	Musculoskeletal_and_connective_tissue_disorders
Musculoskeletal_pain	P14324	62018	Musculoskeletal_pain	Musculoskeletal_and_connective_tissue_pain_and_discomfort	Musculoskeletal_and_connective_tissue_disorders_NEC	Musculoskeletal_and_connective_tissue_disorders
Musculoskeletal_pain	P12821	4912	Musculoskeletal_pain	Musculoskeletal_and_connective_tissue_pain_and_discomfort	Musculoskeletal_and_connective_tissue_disorders_NEC	Musculoskeletal_and_connective_tissue_disorders
Nasal_congestion	P35367	66564	Nasal_congestion	Nasal_congestion_and_inflammations	Upper_respiratory_tract_disorders_(excl_infections)	Respiratory,_thoracic_and_mediastinal_disorders
Nasal_congestion	P18825	8112	Nasal_congestion	Nasal_congestion_and_inflammations	Upper_respiratory_tract_disorders_(excl_infections)	Respiratory,_thoracic_and_mediastinal_disorders
Nasal_congestion	P28223	1179	Nasal_congestion	Nasal_congestion_and_inflammations	Upper_respiratory_tract_disorders_(excl_infections)	Respiratory,_thoracic_and_mediastinal_disorders
Nasal_congestion	P50406	1212	Nasal_congestion	Nasal_congestion_and_inflammations	Upper_respiratory_tract_disorders_(excl_infections)	Respiratory,_thoracic_and_mediastinal_disorders
Nasal_congestion	P18089	8106	Nasal_congestion	Nasal_congestion_and_inflammations	Upper_respiratory_tract_disorders_(excl_infections)	Respiratory,_thoracic_and_mediastinal_disorders
Nasal_congestion	P11229	5169	Nasal_congestion	Nasal_congestion_and_inflammations	Upper_respiratory_tract_disorders_(excl_infections)	Respiratory,_thoracic_and_mediastinal_disorders
Nasal_congestion	P08173	5195	Nasal_congestion	Nasal_congestion_and_inflammations	Upper_respiratory_tract_disorders_(excl_infections)	Respiratory,_thoracic_and_mediastinal_disorders
Nasal_congestion	P08912	5198	Nasal_congestion	Nasal_congestion_and_inflammations	Upper_respiratory_tract_disorders_(excl_infections)	Respiratory,_thoracic_and_mediastinal_disorders
Nasal_congestion	P28335	1189	Nasal_congestion	Nasal_congestion_and_inflammations	Upper_respiratory_tract_disorders_(excl_infections)	Respiratory,_thoracic_and_mediastinal_disorders
Nasal_congestion	P14416	59942	Nasal_congestion	Nasal_congestion_and_inflammations	Upper_respiratory_tract_disorders_(excl_infections)	Respiratory,_thoracic_and_mediastinal_disorders
Nasal_discomfort	P04150	29101	Nasal_discomfort	Upper_respiratory_tract_signs_and_symptoms	Respiratory_tract_signs_and_symptoms	Respiratory,_thoracic_and_mediastinal_disorders
Neuropathy_peripheral	P24534	7571	Neuropathy_peripheral	Peripheral_neuropathies_NEC	Peripheral_neuropathies	Nervous_system_disorders
Neuropathy_peripheral	Q9H227	65117	Neuropathy_peripheral	Peripheral_neuropathies_NEC	Peripheral_neuropathies	Nervous_system_disorders
Neuropathy_peripheral	Q8IWT1	65347	Neuropathy_peripheral	Peripheral_neuropathies_NEC	Peripheral_neuropathies	Nervous_system_disorders
Neuropathy_peripheral	Q9NY72	65583	Neuropathy_peripheral	Peripheral_neuropathies_NEC	Peripheral_neuropathies	Nervous_system_disorders
Neuropathy_peripheral	P21917	59953	Neuropathy_peripheral	Peripheral_neuropathies_NEC	Peripheral_neuropathies	Nervous_system_disorders
Neuropathy_peripheral	Q9Y237	18933	Neuropathy_peripheral	Peripheral_neuropathies_NEC	Peripheral_neuropathies	Nervous_system_disorders
Neuropathy_peripheral	P04083	6035	Neuropathy_peripheral	Peripheral_neuropathies_NEC	Peripheral_neuropathies	Nervous_system_disorders
Neuropathy_peripheral	Q9Y3C6	22648	Neuropathy_peripheral	Peripheral_neuropathies_NEC	Peripheral_neuropathies	Nervous_system_disorders
Neuropathy_peripheral	P62937	17592	Neuropathy_peripheral	Peripheral_neuropathies_NEC	Peripheral_neuropathies	Nervous_system_disorders
Neuropathy_peripheral	Q02790	42486	Neuropathy_peripheral	Peripheral_neuropathies_NEC	Peripheral_neuropathies	Nervous_system_disorders
Neuropathy_peripheral	Q9H2H8	28005	Neuropathy_peripheral	Peripheral_neuropathies_NEC	Peripheral_neuropathies	Nervous_system_disorders
Neuropathy_peripheral	Q9UNP9	13991	Neuropathy_peripheral	Peripheral_neuropathies_NEC	Peripheral_neuropathies	Nervous_system_disorders
Neuropathy_peripheral	P35462	59949	Neuropathy_peripheral	Peripheral_neuropathies_NEC	Peripheral_neuropathies	Nervous_system_disorders
Neuropathy_peripheral	P27707	36152	Neuropathy_peripheral	Peripheral_neuropathies_NEC	Peripheral_neuropathies	Nervous_system_disorders
Neuropathy_peripheral	P20648	20971	Neuropathy_peripheral	Peripheral_neuropathies_NEC	Peripheral_neuropathies	Nervous_system_disorders
Neuropathy_peripheral	O95302	16153	Neuropathy_peripheral	Peripheral_neuropathies_NEC	Peripheral_neuropathies	Nervous_system_disorders
Neuropathy_peripheral	O75344	45290	Neuropathy_peripheral	Peripheral_neuropathies_NEC	Peripheral_neuropathies	Nervous_system_disorders
Neuropathy_peripheral	Q14318	15929	Neuropathy_peripheral	Peripheral_neuropathies_NEC	Peripheral_neuropathies	Nervous_system_disorders
Neuropathy_peripheral	Q08752	35603	Neuropathy_peripheral	Peripheral_neuropathies_NEC	Peripheral_neuropathies	Nervous_system_disorders
Neuropathy_peripheral	Q02880	12976	Neuropathy_peripheral	Peripheral_neuropathies_NEC	Peripheral_neuropathies	Nervous_system_disorders
Neuropathy_peripheral	P23284	6791	Neuropathy_peripheral	Peripheral_neuropathies_NEC	Peripheral_neuropathies	Nervous_system_disorders
Neuropathy_peripheral	P10721	64056	Neuropathy_peripheral	Peripheral_neuropathies_NEC	Peripheral_neuropathies	Nervous_system_disorders
Neuropathy_peripheral	Q13356	32240	Neuropathy_peripheral	Peripheral_neuropathies_NEC	Peripheral_neuropathies	Nervous_system_disorders
Neuropathy_peripheral	P10415	14677	Neuropathy_peripheral	Peripheral_neuropathies_NEC	Peripheral_neuropathies	Nervous_system_disorders
Neuropathy_peripheral	Q13451	17580	Neuropathy_peripheral	Peripheral_neuropathies_NEC	Peripheral_neuropathies	Nervous_system_disorders
Neuropathy_peripheral	P35499	68424	Neuropathy_peripheral	Peripheral_neuropathies_NEC	Peripheral_neuropathies	Nervous_system_disorders
Neuropathy_peripheral	P45877	63606	Neuropathy_peripheral	Peripheral_neuropathies_NEC	Peripheral_neuropathies	Nervous_system_disorders
Neuropathy_peripheral	P35498	66662	Neuropathy_peripheral	Peripheral_neuropathies_NEC	Peripheral_neuropathies	Nervous_system_disorders
Neuropathy_peripheral	P26885	58940	Neuropathy_peripheral	Peripheral_neuropathies_NEC	Peripheral_neuropathies	Nervous_system_disorders
Neuropathy_peripheral	Q00688	62729	Neuropathy_peripheral	Peripheral_neuropathies_NEC	Peripheral_neuropathies	Nervous_system_disorders
Neuropathy_peripheral	P11388	31795	Neuropathy_peripheral	Peripheral_neuropathies_NEC	Peripheral_neuropathies	Nervous_system_disorders
Neuropathy_peripheral	Q07699	67308	Neuropathy_peripheral	Peripheral_neuropathies_NEC	Peripheral_neuropathies	Nervous_system_disorders
Neuropathy_peripheral	Q9Y680	21130	Neuropathy_peripheral	Peripheral_neuropathies_NEC	Peripheral_neuropathies	Nervous_system_disorders
Neuropathy_peripheral	P08185	36608	Neuropathy_peripheral	Peripheral_neuropathies_NEC	Peripheral_neuropathies	Nervous_system_disorders
Neuropathy_peripheral	Q01118	14782	Neuropathy_peripheral	Peripheral_neuropathies_NEC	Peripheral_neuropathies	Nervous_system_disorders
Neuropathy_peripheral	P68106	50788	Neuropathy_peripheral	Peripheral_neuropathies_NEC	Peripheral_neuropathies	Nervous_system_disorders
Neuropathy_peripheral	P30405	51465	Neuropathy_peripheral	Peripheral_neuropathies_NEC	Peripheral_neuropathies	Nervous_system_disorders
Neuropathy_peripheral	Q13427	6260	Neuropathy_peripheral	Peripheral_neuropathies_NEC	Peripheral_neuropathies	Nervous_system_disorders
Neuropathy_peripheral	Q13526	19566	Neuropathy_peripheral	Peripheral_neuropathies_NEC	Peripheral_neuropathies	Nervous_system_disorders
Neuropathy_peripheral	Q9NY46	64563	Neuropathy_peripheral	Peripheral_neuropathies_NEC	Peripheral_neuropathies	Nervous_system_disorders
Neutropenia	P30530	66028	Neutropenia	Neutropenias	White_blood_cell_disorders	Blood_and_lymphatic_system_disorders
Neutropenia	P24534	7571	Neutropenia	Neutropenias	White_blood_cell_disorders	Blood_and_lymphatic_system_disorders
Neutropenia	P07948	13896	Neutropenia	Neutropenias	White_blood_cell_disorders	Blood_and_lymphatic_system_disorders
Neutropenia	Q8IWT1	65347	Neutropenia	Neutropenias	White_blood_cell_disorders	Blood_and_lymphatic_system_disorders
Neutropenia	Q9NY72	65583	Neutropenia	Neutropenias	White_blood_cell_disorders	Blood_and_lymphatic_system_disorders
Neutropenia	P15056	14706	Neutropenia	Neutropenias	White_blood_cell_disorders	Blood_and_lymphatic_system_disorders
Neutropenia	P21917	59953	Neutropenia	Neutropenias	White_blood_cell_disorders	Blood_and_lymphatic_system_disorders
Neutropenia	P16234	30708	Neutropenia	Neutropenias	White_blood_cell_disorders	Blood_and_lymphatic_system_disorders
Neutropenia	P07333	13515	Neutropenia	Neutropenias	White_blood_cell_disorders	Blood_and_lymphatic_system_disorders
Neutropenia	P42684	3600	Neutropenia	Neutropenias	White_blood_cell_disorders	Blood_and_lymphatic_system_disorders
Neutropenia	P12931	14635	Neutropenia	Neutropenias	White_blood_cell_disorders	Blood_and_lymphatic_system_disorders
Neutropenia	P17948	14225	Neutropenia	Neutropenias	White_blood_cell_disorders	Blood_and_lymphatic_system_disorders
Neutropenia	P35968	14637	Neutropenia	Neutropenias	White_blood_cell_disorders	Blood_and_lymphatic_system_disorders
Neutropenia	P27707	36152	Neutropenia	Neutropenias	White_blood_cell_disorders	Blood_and_lymphatic_system_disorders
Neutropenia	P00519	3596	Neutropenia	Neutropenias	White_blood_cell_disorders	Blood_and_lymphatic_system_disorders
Neutropenia	Q86TJ2	26099	Neutropenia	Neutropenias	White_blood_cell_disorders	Blood_and_lymphatic_system_disorders
Neutropenia	P06239	6064	Neutropenia	Neutropenias	White_blood_cell_disorders	Blood_and_lymphatic_system_disorders
Neutropenia	Q14524	18291	Neutropenia	Neutropenias	White_blood_cell_disorders	Blood_and_lymphatic_system_disorders
Neutropenia	P00533	6549	Neutropenia	Neutropenias	White_blood_cell_disorders	Blood_and_lymphatic_system_disorders
Neutropenia	Q02880	12976	Neutropenia	Neutropenias	White_blood_cell_disorders	Blood_and_lymphatic_system_disorders
Neutropenia	P10721	64056	Neutropenia	Neutropenias	White_blood_cell_disorders	Blood_and_lymphatic_system_disorders
Neutropenia	P10415	14677	Neutropenia	Neutropenias	White_blood_cell_disorders	Blood_and_lymphatic_system_disorders
Neutropenia	P35499	68424	Neutropenia	Neutropenias	White_blood_cell_disorders	Blood_and_lymphatic_system_disorders
Neutropenia	P21802	12961	Neutropenia	Neutropenias	White_blood_cell_disorders	Blood_and_lymphatic_system_disorders
Neutropenia	P11388	31795	Neutropenia	Neutropenias	White_blood_cell_disorders	Blood_and_lymphatic_system_disorders
Neutropenia	Q07699	67308	Neutropenia	Neutropenias	White_blood_cell_disorders	Blood_and_lymphatic_system_disorders
Neutropenia	P09619	13540	Neutropenia	Neutropenias	White_blood_cell_disorders	Blood_and_lymphatic_system_disorders
Neutropenia	Q01118	14782	Neutropenia	Neutropenias	White_blood_cell_disorders	Blood_and_lymphatic_system_disorders
Neutropenia	Q9NY46	64563	Neutropenia	Neutropenias	White_blood_cell_disorders	Blood_and_lymphatic_system_disorders
Neutropenia	P12821	4912	Neutropenia	Neutropenias	White_blood_cell_disorders	Blood_and_lymphatic_system_disorders
Nocturia	P24534	7571	Nocturia	Urinary_tract_signs_and_symptoms_NEC	Urinary_tract_signs_and_symptoms	Renal_and_urinary_disorders
Nocturia	Q8IWT1	65347	Nocturia	Urinary_tract_signs_and_symptoms_NEC	Urinary_tract_signs_and_symptoms	Renal_and_urinary_disorders
Nocturia	Q9NY72	65583	Nocturia	Urinary_tract_signs_and_symptoms_NEC	Urinary_tract_signs_and_symptoms	Renal_and_urinary_disorders
Nocturia	Q15413	51944	Nocturia	Urinary_tract_signs_and_symptoms_NEC	Urinary_tract_signs_and_symptoms	Renal_and_urinary_disorders
Nocturia	P21675	18984	Nocturia	Urinary_tract_signs_and_symptoms_NEC	Urinary_tract_signs_and_symptoms	Renal_and_urinary_disorders
Nocturia	Q9BZL6	64649	Nocturia	Urinary_tract_signs_and_symptoms_NEC	Urinary_tract_signs_and_symptoms	Renal_and_urinary_disorders
Nocturia	P21817	19832	Nocturia	Urinary_tract_signs_and_symptoms_NEC	Urinary_tract_signs_and_symptoms	Renal_and_urinary_disorders
Nocturia	P62701	12851	Nocturia	Urinary_tract_signs_and_symptoms_NEC	Urinary_tract_signs_and_symptoms	Renal_and_urinary_disorders
Nocturia	Q14524	18291	Nocturia	Urinary_tract_signs_and_symptoms_NEC	Urinary_tract_signs_and_symptoms	Renal_and_urinary_disorders
Nocturia	Q9H1D0	63056	Nocturia	Urinary_tract_signs_and_symptoms_NEC	Urinary_tract_signs_and_symptoms	Renal_and_urinary_disorders
Nocturia	Q14643	26005	Nocturia	Urinary_tract_signs_and_symptoms_NEC	Urinary_tract_signs_and_symptoms	Renal_and_urinary_disorders
Nocturia	P98161	67045	Nocturia	Urinary_tract_signs_and_symptoms_NEC	Urinary_tract_signs_and_symptoms	Renal_and_urinary_disorders
Nocturia	O75762	4865	Nocturia	Urinary_tract_signs_and_symptoms_NEC	Urinary_tract_signs_and_symptoms	Renal_and_urinary_disorders
Nocturia	Q13563	16075	Nocturia	Urinary_tract_signs_and_symptoms_NEC	Urinary_tract_signs_and_symptoms	Renal_and_urinary_disorders
Nocturia	Q14573	5758	Nocturia	Urinary_tract_signs_and_symptoms_NEC	Urinary_tract_signs_and_symptoms	Renal_and_urinary_disorders
Nocturia	Q92736	6953	Nocturia	Urinary_tract_signs_and_symptoms_NEC	Urinary_tract_signs_and_symptoms	Renal_and_urinary_disorders
Nocturia	Q15139	13918	Nocturia	Urinary_tract_signs_and_symptoms_NEC	Urinary_tract_signs_and_symptoms	Renal_and_urinary_disorders
Nocturia	P35499	68424	Nocturia	Urinary_tract_signs_and_symptoms_NEC	Urinary_tract_signs_and_symptoms	Renal_and_urinary_disorders
Nocturia	Q07699	67308	Nocturia	Urinary_tract_signs_and_symptoms_NEC	Urinary_tract_signs_and_symptoms	Renal_and_urinary_disorders
Nocturia	Q01118	14782	Nocturia	Urinary_tract_signs_and_symptoms_NEC	Urinary_tract_signs_and_symptoms	Renal_and_urinary_disorders
Nocturia	Q9NY46	64563	Nocturia	Urinary_tract_signs_and_symptoms_NEC	Urinary_tract_signs_and_symptoms	Renal_and_urinary_disorders
Ophthalmoplegia	P19971	52167	Ophthalmoplegia	Ocular_nerve_and_muscle_disorders	Ocular_neuromuscular_disorders	Eye_disorders
Orthostatic_hypotension	P34969	1217	Orthostatic_hypotension	Vascular_hypotensive_disorders	Decreased_and_nonspecific_blood_pressure_disorders_and_shock	Vascular_disorders
Orthostatic_hypotension	P18825	8112	Orthostatic_hypotension	Vascular_hypotensive_disorders	Decreased_and_nonspecific_blood_pressure_disorders_and_shock	Vascular_disorders
Orthostatic_hypotension	P09172	59304	Orthostatic_hypotension	Vascular_hypotensive_disorders	Decreased_and_nonspecific_blood_pressure_disorders_and_shock	Vascular_disorders
Orthostatic_hypotension	P50406	1212	Orthostatic_hypotension	Vascular_hypotensive_disorders	Decreased_and_nonspecific_blood_pressure_disorders_and_shock	Vascular_disorders
Orthostatic_hypotension	Q8WTZ4		Orthostatic_hypotension	Vascular_hypotensive_disorders	Decreased_and_nonspecific_blood_pressure_disorders_and_shock	Vascular_disorders
Orthostatic_hypotension	P21728	59934	Orthostatic_hypotension	Vascular_hypotensive_disorders	Decreased_and_nonspecific_blood_pressure_disorders_and_shock	Vascular_disorders
Orthostatic_hypotension	P14416	59942	Orthostatic_hypotension	Vascular_hypotensive_disorders	Decreased_and_nonspecific_blood_pressure_disorders_and_shock	Vascular_disorders
Orthostatic_hypotension	Q9Y2D0	33213	Orthostatic_hypotension	Vascular_hypotensive_disorders	Decreased_and_nonspecific_blood_pressure_disorders_and_shock	Vascular_disorders
Orthostatic_hypotension	P12821	4912	Orthostatic_hypotension	Vascular_hypotensive_disorders	Decreased_and_nonspecific_blood_pressure_disorders_and_shock	Vascular_disorders
Palpitations	P24534	7571	Palpitations	Cardiac_signs_and_symptoms_NEC	Cardiac_disorders,_signs_and_symptoms_NEC	Cardiac_disorders
Palpitations	Q8IWT1	65347	Palpitations	Cardiac_signs_and_symptoms_NEC	Cardiac_disorders,_signs_and_symptoms_NEC	Cardiac_disorders
Palpitations	Q9NY72	65583	Palpitations	Cardiac_signs_and_symptoms_NEC	Cardiac_disorders,_signs_and_symptoms_NEC	Cardiac_disorders
Palpitations	Q15413	51944	Palpitations	Cardiac_signs_and_symptoms_NEC	Cardiac_disorders,_signs_and_symptoms_NEC	Cardiac_disorders
Palpitations	P21917	59953	Palpitations	Cardiac_signs_and_symptoms_NEC	Cardiac_disorders,_signs_and_symptoms_NEC	Cardiac_disorders
Palpitations	P13945	8611	Palpitations	Cardiac_signs_and_symptoms_NEC	Cardiac_disorders,_signs_and_symptoms_NEC	Cardiac_disorders
Palpitations	P03372	14636	Palpitations	Cardiac_signs_and_symptoms_NEC	Cardiac_disorders,_signs_and_symptoms_NEC	Cardiac_disorders
Palpitations	P14416	59942	Palpitations	Cardiac_signs_and_symptoms_NEC	Cardiac_disorders,_signs_and_symptoms_NEC	Cardiac_disorders
Palpitations	P21675	18984	Palpitations	Cardiac_signs_and_symptoms_NEC	Cardiac_disorders,_signs_and_symptoms_NEC	Cardiac_disorders
Palpitations	Q9BZL6	64649	Palpitations	Cardiac_signs_and_symptoms_NEC	Cardiac_disorders,_signs_and_symptoms_NEC	Cardiac_disorders
Palpitations	P07550	8602	Palpitations	Cardiac_signs_and_symptoms_NEC	Cardiac_disorders,_signs_and_symptoms_NEC	Cardiac_disorders
Palpitations	P08588	8592	Palpitations	Cardiac_signs_and_symptoms_NEC	Cardiac_disorders,_signs_and_symptoms_NEC	Cardiac_disorders
Palpitations	P20648	20971	Palpitations	Cardiac_signs_and_symptoms_NEC	Cardiac_disorders,_signs_and_symptoms_NEC	Cardiac_disorders
Palpitations	Q86TJ2	26099	Palpitations	Cardiac_signs_and_symptoms_NEC	Cardiac_disorders,_signs_and_symptoms_NEC	Cardiac_disorders
Palpitations	P21817	19832	Palpitations	Cardiac_signs_and_symptoms_NEC	Cardiac_disorders,_signs_and_symptoms_NEC	Cardiac_disorders
Palpitations	P30556	9691	Palpitations	Cardiac_signs_and_symptoms_NEC	Cardiac_disorders,_signs_and_symptoms_NEC	Cardiac_disorders
Palpitations	P62701	12851	Palpitations	Cardiac_signs_and_symptoms_NEC	Cardiac_disorders,_signs_and_symptoms_NEC	Cardiac_disorders
Palpitations	Q14524	18291	Palpitations	Cardiac_signs_and_symptoms_NEC	Cardiac_disorders,_signs_and_symptoms_NEC	Cardiac_disorders
Palpitations	Q9H1D0	63056	Palpitations	Cardiac_signs_and_symptoms_NEC	Cardiac_disorders,_signs_and_symptoms_NEC	Cardiac_disorders
Palpitations	Q14643	26005	Palpitations	Cardiac_signs_and_symptoms_NEC	Cardiac_disorders,_signs_and_symptoms_NEC	Cardiac_disorders
Palpitations	P98161	67045	Palpitations	Cardiac_signs_and_symptoms_NEC	Cardiac_disorders,_signs_and_symptoms_NEC	Cardiac_disorders
Palpitations	O75762	4865	Palpitations	Cardiac_signs_and_symptoms_NEC	Cardiac_disorders,_signs_and_symptoms_NEC	Cardiac_disorders
Palpitations	Q13563	16075	Palpitations	Cardiac_signs_and_symptoms_NEC	Cardiac_disorders,_signs_and_symptoms_NEC	Cardiac_disorders
Palpitations	Q14573	5758	Palpitations	Cardiac_signs_and_symptoms_NEC	Cardiac_disorders,_signs_and_symptoms_NEC	Cardiac_disorders
Palpitations	Q92736	6953	Palpitations	Cardiac_signs_and_symptoms_NEC	Cardiac_disorders,_signs_and_symptoms_NEC	Cardiac_disorders
Palpitations	Q15139	13918	Palpitations	Cardiac_signs_and_symptoms_NEC	Cardiac_disorders,_signs_and_symptoms_NEC	Cardiac_disorders
Palpitations	P35499	68424	Palpitations	Cardiac_signs_and_symptoms_NEC	Cardiac_disorders,_signs_and_symptoms_NEC	Cardiac_disorders
Palpitations	P35498	66662	Palpitations	Cardiac_signs_and_symptoms_NEC	Cardiac_disorders,_signs_and_symptoms_NEC	Cardiac_disorders
Palpitations	Q12809	61990	Palpitations	Cardiac_signs_and_symptoms_NEC	Cardiac_disorders,_signs_and_symptoms_NEC	Cardiac_disorders
Palpitations	Q07699	67308	Palpitations	Cardiac_signs_and_symptoms_NEC	Cardiac_disorders,_signs_and_symptoms_NEC	Cardiac_disorders
Palpitations	Q01118	14782	Palpitations	Cardiac_signs_and_symptoms_NEC	Cardiac_disorders,_signs_and_symptoms_NEC	Cardiac_disorders
Palpitations	Q9NY46	64563	Palpitations	Cardiac_signs_and_symptoms_NEC	Cardiac_disorders,_signs_and_symptoms_NEC	Cardiac_disorders
Palpitations	P12821	4912	Palpitations	Cardiac_signs_and_symptoms_NEC	Cardiac_disorders,_signs_and_symptoms_NEC	Cardiac_disorders
Peptic_ulcer	P04150	29101	Peptic_ulcer	Peptic_ulcers_and_perforation	Gastrointestinal_ulceration_and_perforation	Gastrointestinal_disorders
Petechiae	P24534	7571	Petechiae	Purpura_and_related_conditions	Skin_vascular_abnormalities	Skin_and_subcutaneous_tissue_disorders
Petechiae	Q9H227	65117	Petechiae	Purpura_and_related_conditions	Skin_vascular_abnormalities	Skin_and_subcutaneous_tissue_disorders
Petechiae	Q8IWT1	65347	Petechiae	Purpura_and_related_conditions	Skin_vascular_abnormalities	Skin_and_subcutaneous_tissue_disorders
Petechiae	Q9NY72	65583	Petechiae	Purpura_and_related_conditions	Skin_vascular_abnormalities	Skin_and_subcutaneous_tissue_disorders
Petechiae	O15146	14420	Petechiae	Purpura_and_related_conditions	Skin_vascular_abnormalities	Skin_and_subcutaneous_tissue_disorders
Petechiae	Q15413	51944	Petechiae	Purpura_and_related_conditions	Skin_vascular_abnormalities	Skin_and_subcutaneous_tissue_disorders
Petechiae	P10276	48641	Petechiae	Purpura_and_related_conditions	Skin_vascular_abnormalities	Skin_and_subcutaneous_tissue_disorders
Petechiae	P04083	6035	Petechiae	Purpura_and_related_conditions	Skin_vascular_abnormalities	Skin_and_subcutaneous_tissue_disorders
Petechiae	P03372	14636	Petechiae	Purpura_and_related_conditions	Skin_vascular_abnormalities	Skin_and_subcutaneous_tissue_disorders
Petechiae	Q9NZT2	62165	Petechiae	Purpura_and_related_conditions	Skin_vascular_abnormalities	Skin_and_subcutaneous_tissue_disorders
Petechiae	P48061	69705	Petechiae	Purpura_and_related_conditions	Skin_vascular_abnormalities	Skin_and_subcutaneous_tissue_disorders
Petechiae	P48443	36352	Petechiae	Purpura_and_related_conditions	Skin_vascular_abnormalities	Skin_and_subcutaneous_tissue_disorders
Petechiae	P04278	58943	Petechiae	Purpura_and_related_conditions	Skin_vascular_abnormalities	Skin_and_subcutaneous_tissue_disorders
Petechiae	Q9BZL6	64649	Petechiae	Purpura_and_related_conditions	Skin_vascular_abnormalities	Skin_and_subcutaneous_tissue_disorders
Petechiae	P19793	28385	Petechiae	Purpura_and_related_conditions	Skin_vascular_abnormalities	Skin_and_subcutaneous_tissue_disorders
Petechiae	Q86TJ2	26099	Petechiae	Purpura_and_related_conditions	Skin_vascular_abnormalities	Skin_and_subcutaneous_tissue_disorders
Petechiae	P21817	19832	Petechiae	Purpura_and_related_conditions	Skin_vascular_abnormalities	Skin_and_subcutaneous_tissue_disorders
Petechiae	P62701	12851	Petechiae	Purpura_and_related_conditions	Skin_vascular_abnormalities	Skin_and_subcutaneous_tissue_disorders
Petechiae	Q14524	18291	Petechiae	Purpura_and_related_conditions	Skin_vascular_abnormalities	Skin_and_subcutaneous_tissue_disorders
Petechiae	Q9H1D0	63056	Petechiae	Purpura_and_related_conditions	Skin_vascular_abnormalities	Skin_and_subcutaneous_tissue_disorders
Petechiae	Q14643	26005	Petechiae	Purpura_and_related_conditions	Skin_vascular_abnormalities	Skin_and_subcutaneous_tissue_disorders
Petechiae	P98161	67045	Petechiae	Purpura_and_related_conditions	Skin_vascular_abnormalities	Skin_and_subcutaneous_tissue_disorders
Petechiae	O75762	4865	Petechiae	Purpura_and_related_conditions	Skin_vascular_abnormalities	Skin_and_subcutaneous_tissue_disorders
Petechiae	Q13563	16075	Petechiae	Purpura_and_related_conditions	Skin_vascular_abnormalities	Skin_and_subcutaneous_tissue_disorders
Petechiae	P04150	29101	Petechiae	Purpura_and_related_conditions	Skin_vascular_abnormalities	Skin_and_subcutaneous_tissue_disorders
Petechiae	Q14573	5758	Petechiae	Purpura_and_related_conditions	Skin_vascular_abnormalities	Skin_and_subcutaneous_tissue_disorders
Petechiae	Q92736	6953	Petechiae	Purpura_and_related_conditions	Skin_vascular_abnormalities	Skin_and_subcutaneous_tissue_disorders
Petechiae	Q15139	13918	Petechiae	Purpura_and_related_conditions	Skin_vascular_abnormalities	Skin_and_subcutaneous_tissue_disorders
Petechiae	P08235	13796	Petechiae	Purpura_and_related_conditions	Skin_vascular_abnormalities	Skin_and_subcutaneous_tissue_disorders
Petechiae	P35499	68424	Petechiae	Purpura_and_related_conditions	Skin_vascular_abnormalities	Skin_and_subcutaneous_tissue_disorders
Petechiae	P28702	28496	Petechiae	Purpura_and_related_conditions	Skin_vascular_abnormalities	Skin_and_subcutaneous_tissue_disorders
Petechiae	Q07699	67308	Petechiae	Purpura_and_related_conditions	Skin_vascular_abnormalities	Skin_and_subcutaneous_tissue_disorders
Petechiae	P10826	5706	Petechiae	Purpura_and_related_conditions	Skin_vascular_abnormalities	Skin_and_subcutaneous_tissue_disorders
Petechiae	P08185	36608	Petechiae	Purpura_and_related_conditions	Skin_vascular_abnormalities	Skin_and_subcutaneous_tissue_disorders
Petechiae	Q01118	14782	Petechiae	Purpura_and_related_conditions	Skin_vascular_abnormalities	Skin_and_subcutaneous_tissue_disorders
Petechiae	P19838	6119	Petechiae	Purpura_and_related_conditions	Skin_vascular_abnormalities	Skin_and_subcutaneous_tissue_disorders
Petechiae	Q9NY46	64563	Petechiae	Purpura_and_related_conditions	Skin_vascular_abnormalities	Skin_and_subcutaneous_tissue_disorders
Photophobia	P21918	59957	Photophobia	Ocular_sensation_disorders	Ocular_sensory_symptoms_NEC	Eye_disorders
Photophobia	P24534	7571	Photophobia	Ocular_sensation_disorders	Ocular_sensory_symptoms_NEC	Eye_disorders
Photophobia	Q8IWT1	65347	Photophobia	Ocular_sensation_disorders	Ocular_sensory_symptoms_NEC	Eye_disorders
Photophobia	Q9NY72	65583	Photophobia	Ocular_sensation_disorders	Ocular_sensory_symptoms_NEC	Eye_disorders
Photophobia	Q15413	51944	Photophobia	Ocular_sensation_disorders	Ocular_sensory_symptoms_NEC	Eye_disorders
Photophobia	P21917	59953	Photophobia	Ocular_sensation_disorders	Ocular_sensory_symptoms_NEC	Eye_disorders
Photophobia	P13945	8611	Photophobia	Ocular_sensation_disorders	Ocular_sensory_symptoms_NEC	Eye_disorders
Photophobia	Q9Y237	18933	Photophobia	Ocular_sensation_disorders	Ocular_sensory_symptoms_NEC	Eye_disorders
Photophobia	P42261	53152	Photophobia	Ocular_sensation_disorders	Ocular_sensory_symptoms_NEC	Eye_disorders
Photophobia	P14416	59942	Photophobia	Ocular_sensation_disorders	Ocular_sensory_symptoms_NEC	Eye_disorders
Photophobia	Q9Y3C6	22648	Photophobia	Ocular_sensation_disorders	Ocular_sensory_symptoms_NEC	Eye_disorders
Photophobia	P62937	17592	Photophobia	Ocular_sensation_disorders	Ocular_sensory_symptoms_NEC	Eye_disorders
Photophobia	Q02790	42486	Photophobia	Ocular_sensation_disorders	Ocular_sensory_symptoms_NEC	Eye_disorders
Photophobia	Q9H2H8	28005	Photophobia	Ocular_sensation_disorders	Ocular_sensory_symptoms_NEC	Eye_disorders
Photophobia	Q9UNP9	13991	Photophobia	Ocular_sensation_disorders	Ocular_sensory_symptoms_NEC	Eye_disorders
Photophobia	P35462	59949	Photophobia	Ocular_sensation_disorders	Ocular_sensory_symptoms_NEC	Eye_disorders
Photophobia	Q9BZL6	64649	Photophobia	Ocular_sensation_disorders	Ocular_sensory_symptoms_NEC	Eye_disorders
Photophobia	P07550	8602	Photophobia	Ocular_sensation_disorders	Ocular_sensory_symptoms_NEC	Eye_disorders
Photophobia	P08588	8592	Photophobia	Ocular_sensation_disorders	Ocular_sensory_symptoms_NEC	Eye_disorders
Photophobia	P20648	20971	Photophobia	Ocular_sensation_disorders	Ocular_sensory_symptoms_NEC	Eye_disorders
Photophobia	P21728	59934	Photophobia	Ocular_sensation_disorders	Ocular_sensory_symptoms_NEC	Eye_disorders
Photophobia	Q86TJ2	26099	Photophobia	Ocular_sensation_disorders	Ocular_sensory_symptoms_NEC	Eye_disorders
Photophobia	P21817	19832	Photophobia	Ocular_sensation_disorders	Ocular_sensory_symptoms_NEC	Eye_disorders
Photophobia	O95302	16153	Photophobia	Ocular_sensation_disorders	Ocular_sensory_symptoms_NEC	Eye_disorders
Photophobia	Q14524	18291	Photophobia	Ocular_sensation_disorders	Ocular_sensory_symptoms_NEC	Eye_disorders
Photophobia	P62701	12851	Photophobia	Ocular_sensation_disorders	Ocular_sensory_symptoms_NEC	Eye_disorders
Photophobia	O75344	45290	Photophobia	Ocular_sensation_disorders	Ocular_sensory_symptoms_NEC	Eye_disorders
Photophobia	Q9H1D0	63056	Photophobia	Ocular_sensation_disorders	Ocular_sensory_symptoms_NEC	Eye_disorders
Photophobia	Q14643	26005	Photophobia	Ocular_sensation_disorders	Ocular_sensory_symptoms_NEC	Eye_disorders
Photophobia	Q14318	15929	Photophobia	Ocular_sensation_disorders	Ocular_sensory_symptoms_NEC	Eye_disorders
Photophobia	Q08752	35603	Photophobia	Ocular_sensation_disorders	Ocular_sensory_symptoms_NEC	Eye_disorders
Photophobia	P98161	67045	Photophobia	Ocular_sensation_disorders	Ocular_sensory_symptoms_NEC	Eye_disorders
Photophobia	O75762	4865	Photophobia	Ocular_sensation_disorders	Ocular_sensory_symptoms_NEC	Eye_disorders
Photophobia	Q13563	16075	Photophobia	Ocular_sensation_disorders	Ocular_sensory_symptoms_NEC	Eye_disorders
Photophobia	P23284	6791	Photophobia	Ocular_sensation_disorders	Ocular_sensory_symptoms_NEC	Eye_disorders
Photophobia	Q13356	32240	Photophobia	Ocular_sensation_disorders	Ocular_sensory_symptoms_NEC	Eye_disorders
Photophobia	Q14573	5758	Photophobia	Ocular_sensation_disorders	Ocular_sensory_symptoms_NEC	Eye_disorders
Photophobia	P10415	14677	Photophobia	Ocular_sensation_disorders	Ocular_sensory_symptoms_NEC	Eye_disorders
Photophobia	Q92736	6953	Photophobia	Ocular_sensation_disorders	Ocular_sensory_symptoms_NEC	Eye_disorders
Photophobia	Q15139	13918	Photophobia	Ocular_sensation_disorders	Ocular_sensory_symptoms_NEC	Eye_disorders
Photophobia	Q13451	17580	Photophobia	Ocular_sensation_disorders	Ocular_sensory_symptoms_NEC	Eye_disorders
Photophobia	P35499	68424	Photophobia	Ocular_sensation_disorders	Ocular_sensory_symptoms_NEC	Eye_disorders
Photophobia	P45877	63606	Photophobia	Ocular_sensation_disorders	Ocular_sensory_symptoms_NEC	Eye_disorders
Photophobia	P35367	66564	Photophobia	Ocular_sensation_disorders	Ocular_sensory_symptoms_NEC	Eye_disorders
Photophobia	P26885	58940	Photophobia	Ocular_sensation_disorders	Ocular_sensory_symptoms_NEC	Eye_disorders
Photophobia	P35498	66662	Photophobia	Ocular_sensation_disorders	Ocular_sensory_symptoms_NEC	Eye_disorders
Photophobia	Q00688	62729	Photophobia	Ocular_sensation_disorders	Ocular_sensory_symptoms_NEC	Eye_disorders
Photophobia	P11388	31795	Photophobia	Ocular_sensation_disorders	Ocular_sensory_symptoms_NEC	Eye_disorders
Photophobia	Q07699	67308	Photophobia	Ocular_sensation_disorders	Ocular_sensory_symptoms_NEC	Eye_disorders
Photophobia	Q9Y680	21130	Photophobia	Ocular_sensation_disorders	Ocular_sensory_symptoms_NEC	Eye_disorders
Photophobia	P68106	50788	Photophobia	Ocular_sensation_disorders	Ocular_sensory_symptoms_NEC	Eye_disorders
Photophobia	Q01118	14782	Photophobia	Ocular_sensation_disorders	Ocular_sensory_symptoms_NEC	Eye_disorders
Photophobia	P30405	51465	Photophobia	Ocular_sensation_disorders	Ocular_sensory_symptoms_NEC	Eye_disorders
Photophobia	Q13427	6260	Photophobia	Ocular_sensation_disorders	Ocular_sensory_symptoms_NEC	Eye_disorders
Photophobia	O76074	65602	Photophobia	Ocular_sensation_disorders	Ocular_sensory_symptoms_NEC	Eye_disorders
Photophobia	P43088	43879	Photophobia	Ocular_sensation_disorders	Ocular_sensory_symptoms_NEC	Eye_disorders
Photophobia	Q13526	19566	Photophobia	Ocular_sensation_disorders	Ocular_sensory_symptoms_NEC	Eye_disorders
Photophobia	Q9NY46	64563	Photophobia	Ocular_sensation_disorders	Ocular_sensory_symptoms_NEC	Eye_disorders
Photophobia	P12821	4912	Photophobia	Ocular_sensation_disorders	Ocular_sensory_symptoms_NEC	Eye_disorders
Pleurisy	P50406	1212	Pleurisy	Pleural_infections_and_inflammations	Pleural_disorders	Respiratory,_thoracic_and_mediastinal_disorders
Pre-eclampsia	P01019	12280	Pre-eclampsia	Hypertension_associated_disorders_of_pregnancy	Maternal_complications_of_pregnancy	Pregnancy,_puerperium_and_perinatal_conditions
Renal_tubular_acidosis	P00918	33167	Renal_tubular_acidosis	Nephropathies_and_tubular_disorders_NEC	Nephropathies	Renal_and_urinary_disorders
Respiratory_depression	P35372	51265	Respiratory_depression	Breathing_abnormalities	Respiratory_disorders_NEC	Respiratory,_thoracic_and_mediastinal_disorders
Respiratory_failure	P30530	66028	Respiratory_failure	Respiratory_failures_(excl_neonatal)	Respiratory_disorders_NEC	Respiratory,_thoracic_and_mediastinal_disorders
Respiratory_failure	P07948	13896	Respiratory_failure	Respiratory_failures_(excl_neonatal)	Respiratory_disorders_NEC	Respiratory,_thoracic_and_mediastinal_disorders
Respiratory_failure	P00533	6549	Respiratory_failure	Respiratory_failures_(excl_neonatal)	Respiratory_disorders_NEC	Respiratory,_thoracic_and_mediastinal_disorders
Respiratory_failure	P06239	6064	Respiratory_failure	Respiratory_failures_(excl_neonatal)	Respiratory_disorders_NEC	Respiratory,_thoracic_and_mediastinal_disorders
Respiratory_failure	P09619	13540	Respiratory_failure	Respiratory_failures_(excl_neonatal)	Respiratory_disorders_NEC	Respiratory,_thoracic_and_mediastinal_disorders
Respiratory_failure	P10253	19277	Respiratory_failure	Respiratory_failures_(excl_neonatal)	Respiratory_disorders_NEC	Respiratory,_thoracic_and_mediastinal_disorders
Respiratory_failure	P07333	13515	Respiratory_failure	Respiratory_failures_(excl_neonatal)	Respiratory_disorders_NEC	Respiratory,_thoracic_and_mediastinal_disorders
Respiratory_failure	P42684	3600	Respiratory_failure	Respiratory_failures_(excl_neonatal)	Respiratory_disorders_NEC	Respiratory,_thoracic_and_mediastinal_disorders
Respiratory_failure	P12931	14635	Respiratory_failure	Respiratory_failures_(excl_neonatal)	Respiratory_disorders_NEC	Respiratory,_thoracic_and_mediastinal_disorders
Strabismus	P24534	7571	Strabismus	Ocular_nerve_and_muscle_disorders	Ocular_neuromuscular_disorders	Eye_disorders
Strabismus	Q8IWT1	65347	Strabismus	Ocular_nerve_and_muscle_disorders	Ocular_neuromuscular_disorders	Eye_disorders
Strabismus	Q9NY72	65583	Strabismus	Ocular_nerve_and_muscle_disorders	Ocular_neuromuscular_disorders	Eye_disorders
Strabismus	Q07699	67308	Strabismus	Ocular_nerve_and_muscle_disorders	Ocular_neuromuscular_disorders	Eye_disorders
Strabismus	Q01118	14782	Strabismus	Ocular_nerve_and_muscle_disorders	Ocular_neuromuscular_disorders	Eye_disorders
Strabismus	P35499	68424	Strabismus	Ocular_nerve_and_muscle_disorders	Ocular_neuromuscular_disorders	Eye_disorders
Strabismus	Q9NY46	64563	Strabismus	Ocular_nerve_and_muscle_disorders	Ocular_neuromuscular_disorders	Eye_disorders
Tachycardia	P21918	59957	Tachycardia	Rate_and_rhythm_disorders_NEC	Cardiac_arrhythmias	Cardiac_disorders
Tachycardia	P24534	7571	Tachycardia	Rate_and_rhythm_disorders_NEC	Cardiac_arrhythmias	Cardiac_disorders
Tachycardia	Q8IWT1	65347	Tachycardia	Rate_and_rhythm_disorders_NEC	Cardiac_arrhythmias	Cardiac_disorders
Tachycardia	Q9NY72	65583	Tachycardia	Rate_and_rhythm_disorders_NEC	Cardiac_arrhythmias	Cardiac_disorders
Tachycardia	Q15413	51944	Tachycardia	Rate_and_rhythm_disorders_NEC	Cardiac_arrhythmias	Cardiac_disorders
Tachycardia	P21917	59953	Tachycardia	Rate_and_rhythm_disorders_NEC	Cardiac_arrhythmias	Cardiac_disorders
Tachycardia	Q9NZT2	62165	Tachycardia	Rate_and_rhythm_disorders_NEC	Cardiac_arrhythmias	Cardiac_disorders
Tachycardia	P14416	59942	Tachycardia	Rate_and_rhythm_disorders_NEC	Cardiac_arrhythmias	Cardiac_disorders
Tachycardia	P21675	18984	Tachycardia	Rate_and_rhythm_disorders_NEC	Cardiac_arrhythmias	Cardiac_disorders
Tachycardia	P35462	59949	Tachycardia	Rate_and_rhythm_disorders_NEC	Cardiac_arrhythmias	Cardiac_disorders
Tachycardia	Q9BZL6	64649	Tachycardia	Rate_and_rhythm_disorders_NEC	Cardiac_arrhythmias	Cardiac_disorders
Tachycardia	P11229	5169	Tachycardia	Rate_and_rhythm_disorders_NEC	Cardiac_arrhythmias	Cardiac_disorders
Tachycardia	P21728	59934	Tachycardia	Rate_and_rhythm_disorders_NEC	Cardiac_arrhythmias	Cardiac_disorders
Tachycardia	P20309	5187	Tachycardia	Rate_and_rhythm_disorders_NEC	Cardiac_arrhythmias	Cardiac_disorders
Tachycardia	Q86TJ2	26099	Tachycardia	Rate_and_rhythm_disorders_NEC	Cardiac_arrhythmias	Cardiac_disorders
Tachycardia	P21817	19832	Tachycardia	Rate_and_rhythm_disorders_NEC	Cardiac_arrhythmias	Cardiac_disorders
Tachycardia	P08172	5179	Tachycardia	Rate_and_rhythm_disorders_NEC	Cardiac_arrhythmias	Cardiac_disorders
Tachycardia	P62701	12851	Tachycardia	Rate_and_rhythm_disorders_NEC	Cardiac_arrhythmias	Cardiac_disorders
Tachycardia	Q14524	18291	Tachycardia	Rate_and_rhythm_disorders_NEC	Cardiac_arrhythmias	Cardiac_disorders
Tachycardia	Q9H1D0	63056	Tachycardia	Rate_and_rhythm_disorders_NEC	Cardiac_arrhythmias	Cardiac_disorders
Tachycardia	Q14643	26005	Tachycardia	Rate_and_rhythm_disorders_NEC	Cardiac_arrhythmias	Cardiac_disorders
Tachycardia	P98161	67045	Tachycardia	Rate_and_rhythm_disorders_NEC	Cardiac_arrhythmias	Cardiac_disorders
Tachycardia	O75762	4865	Tachycardia	Rate_and_rhythm_disorders_NEC	Cardiac_arrhythmias	Cardiac_disorders
Tachycardia	Q13563	16075	Tachycardia	Rate_and_rhythm_disorders_NEC	Cardiac_arrhythmias	Cardiac_disorders
Tachycardia	Q02880	12976	Tachycardia	Rate_and_rhythm_disorders_NEC	Cardiac_arrhythmias	Cardiac_disorders
Tachycardia	P10721	64056	Tachycardia	Rate_and_rhythm_disorders_NEC	Cardiac_arrhythmias	Cardiac_disorders
Tachycardia	P08173	5195	Tachycardia	Rate_and_rhythm_disorders_NEC	Cardiac_arrhythmias	Cardiac_disorders
Tachycardia	Q14573	5758	Tachycardia	Rate_and_rhythm_disorders_NEC	Cardiac_arrhythmias	Cardiac_disorders
Tachycardia	Q92736	6953	Tachycardia	Rate_and_rhythm_disorders_NEC	Cardiac_arrhythmias	Cardiac_disorders
Tachycardia	P23416	60837	Tachycardia	Rate_and_rhythm_disorders_NEC	Cardiac_arrhythmias	Cardiac_disorders
Tachycardia	Q15139	13918	Tachycardia	Rate_and_rhythm_disorders_NEC	Cardiac_arrhythmias	Cardiac_disorders
Tachycardia	P35499	68424	Tachycardia	Rate_and_rhythm_disorders_NEC	Cardiac_arrhythmias	Cardiac_disorders
Tachycardia	P23975	66463	Tachycardia	Rate_and_rhythm_disorders_NEC	Cardiac_arrhythmias	Cardiac_disorders
Tachycardia	P35367	66564	Tachycardia	Rate_and_rhythm_disorders_NEC	Cardiac_arrhythmias	Cardiac_disorders
Tachycardia	P01019	12280	Tachycardia	Rate_and_rhythm_disorders_NEC	Cardiac_arrhythmias	Cardiac_disorders
Tachycardia	P28223	1179	Tachycardia	Rate_and_rhythm_disorders_NEC	Cardiac_arrhythmias	Cardiac_disorders
Tachycardia	P50406	1212	Tachycardia	Rate_and_rhythm_disorders_NEC	Cardiac_arrhythmias	Cardiac_disorders
Tachycardia	P11388	31795	Tachycardia	Rate_and_rhythm_disorders_NEC	Cardiac_arrhythmias	Cardiac_disorders
Tachycardia	Q07699	67308	Tachycardia	Rate_and_rhythm_disorders_NEC	Cardiac_arrhythmias	Cardiac_disorders
Tachycardia	P48167	15734	Tachycardia	Rate_and_rhythm_disorders_NEC	Cardiac_arrhythmias	Cardiac_disorders
Tachycardia	P08912	5198	Tachycardia	Rate_and_rhythm_disorders_NEC	Cardiac_arrhythmias	Cardiac_disorders
Tachycardia	P28335	1189	Tachycardia	Rate_and_rhythm_disorders_NEC	Cardiac_arrhythmias	Cardiac_disorders
Tachycardia	Q01118	14782	Tachycardia	Rate_and_rhythm_disorders_NEC	Cardiac_arrhythmias	Cardiac_disorders
Tachycardia	Q9NY46	64563	Tachycardia	Rate_and_rhythm_disorders_NEC	Cardiac_arrhythmias	Cardiac_disorders
Tachycardia	P12821	4912	Tachycardia	Rate_and_rhythm_disorders_NEC	Cardiac_arrhythmias	Cardiac_disorders
Thyroid_disorder	P07202	57931	Thyroid_disorder	Thyroid_disorders_NEC	Thyroid_gland_disorders	Endocrine_disorders
Tinnitus	P21918	59957	Tinnitus	Inner_ear_signs_and_symptoms	Inner_ear_and_VIIIth_cranial_nerve_disorders	Ear_and_labyrinth_disorders
Tinnitus	P24534	7571	Tinnitus	Inner_ear_signs_and_symptoms	Inner_ear_and_VIIIth_cranial_nerve_disorders	Ear_and_labyrinth_disorders
Tinnitus	Q8IWT1	65347	Tinnitus	Inner_ear_signs_and_symptoms	Inner_ear_and_VIIIth_cranial_nerve_disorders	Ear_and_labyrinth_disorders
Tinnitus	Q9NY72	65583	Tinnitus	Inner_ear_signs_and_symptoms	Inner_ear_and_VIIIth_cranial_nerve_disorders	Ear_and_labyrinth_disorders
Tinnitus	P02741	49240	Tinnitus	Inner_ear_signs_and_symptoms	Inner_ear_and_VIIIth_cranial_nerve_disorders	Ear_and_labyrinth_disorders
Tinnitus	P21917	59953	Tinnitus	Inner_ear_signs_and_symptoms	Inner_ear_and_VIIIth_cranial_nerve_disorders	Ear_and_labyrinth_disorders
Tinnitus	P13945	8611	Tinnitus	Inner_ear_signs_and_symptoms	Inner_ear_and_VIIIth_cranial_nerve_disorders	Ear_and_labyrinth_disorders
Tinnitus	Q9Y237	18933	Tinnitus	Inner_ear_signs_and_symptoms	Inner_ear_and_VIIIth_cranial_nerve_disorders	Ear_and_labyrinth_disorders
Tinnitus	P14416	59942	Tinnitus	Inner_ear_signs_and_symptoms	Inner_ear_and_VIIIth_cranial_nerve_disorders	Ear_and_labyrinth_disorders
Tinnitus	Q9Y3C6	22648	Tinnitus	Inner_ear_signs_and_symptoms	Inner_ear_and_VIIIth_cranial_nerve_disorders	Ear_and_labyrinth_disorders
Tinnitus	P62937	17592	Tinnitus	Inner_ear_signs_and_symptoms	Inner_ear_and_VIIIth_cranial_nerve_disorders	Ear_and_labyrinth_disorders
Tinnitus	P07333	13515	Tinnitus	Inner_ear_signs_and_symptoms	Inner_ear_and_VIIIth_cranial_nerve_disorders	Ear_and_labyrinth_disorders
Tinnitus	Q02790	42486	Tinnitus	Inner_ear_signs_and_symptoms	Inner_ear_and_VIIIth_cranial_nerve_disorders	Ear_and_labyrinth_disorders
Tinnitus	P21675	18984	Tinnitus	Inner_ear_signs_and_symptoms	Inner_ear_and_VIIIth_cranial_nerve_disorders	Ear_and_labyrinth_disorders
Tinnitus	Q9H2H8	28005	Tinnitus	Inner_ear_signs_and_symptoms	Inner_ear_and_VIIIth_cranial_nerve_disorders	Ear_and_labyrinth_disorders
Tinnitus	Q9UNP9	13991	Tinnitus	Inner_ear_signs_and_symptoms	Inner_ear_and_VIIIth_cranial_nerve_disorders	Ear_and_labyrinth_disorders
Tinnitus	P35462	59949	Tinnitus	Inner_ear_signs_and_symptoms	Inner_ear_and_VIIIth_cranial_nerve_disorders	Ear_and_labyrinth_disorders
Tinnitus	P07550	8602	Tinnitus	Inner_ear_signs_and_symptoms	Inner_ear_and_VIIIth_cranial_nerve_disorders	Ear_and_labyrinth_disorders
Tinnitus	P08588	8592	Tinnitus	Inner_ear_signs_and_symptoms	Inner_ear_and_VIIIth_cranial_nerve_disorders	Ear_and_labyrinth_disorders
Tinnitus	P20648	20971	Tinnitus	Inner_ear_signs_and_symptoms	Inner_ear_and_VIIIth_cranial_nerve_disorders	Ear_and_labyrinth_disorders
Tinnitus	P21728	59934	Tinnitus	Inner_ear_signs_and_symptoms	Inner_ear_and_VIIIth_cranial_nerve_disorders	Ear_and_labyrinth_disorders
Tinnitus	P00915	33145	Tinnitus	Inner_ear_signs_and_symptoms	Inner_ear_and_VIIIth_cranial_nerve_disorders	Ear_and_labyrinth_disorders
Tinnitus	P30556	9691	Tinnitus	Inner_ear_signs_and_symptoms	Inner_ear_and_VIIIth_cranial_nerve_disorders	Ear_and_labyrinth_disorders
Tinnitus	O95302	16153	Tinnitus	Inner_ear_signs_and_symptoms	Inner_ear_and_VIIIth_cranial_nerve_disorders	Ear_and_labyrinth_disorders
Tinnitus	Q14524	18291	Tinnitus	Inner_ear_signs_and_symptoms	Inner_ear_and_VIIIth_cranial_nerve_disorders	Ear_and_labyrinth_disorders
Tinnitus	O75344	45290	Tinnitus	Inner_ear_signs_and_symptoms	Inner_ear_and_VIIIth_cranial_nerve_disorders	Ear_and_labyrinth_disorders
Tinnitus	O43570	33119	Tinnitus	Inner_ear_signs_and_symptoms	Inner_ear_and_VIIIth_cranial_nerve_disorders	Ear_and_labyrinth_disorders
Tinnitus	Q14318	15929	Tinnitus	Inner_ear_signs_and_symptoms	Inner_ear_and_VIIIth_cranial_nerve_disorders	Ear_and_labyrinth_disorders
Tinnitus	Q08752	35603	Tinnitus	Inner_ear_signs_and_symptoms	Inner_ear_and_VIIIth_cranial_nerve_disorders	Ear_and_labyrinth_disorders
Tinnitus	P23284	6791	Tinnitus	Inner_ear_signs_and_symptoms	Inner_ear_and_VIIIth_cranial_nerve_disorders	Ear_and_labyrinth_disorders
Tinnitus	Q16790	33243	Tinnitus	Inner_ear_signs_and_symptoms	Inner_ear_and_VIIIth_cranial_nerve_disorders	Ear_and_labyrinth_disorders
Tinnitus	Q13356	32240	Tinnitus	Inner_ear_signs_and_symptoms	Inner_ear_and_VIIIth_cranial_nerve_disorders	Ear_and_labyrinth_disorders
Tinnitus	Q13451	17580	Tinnitus	Inner_ear_signs_and_symptoms	Inner_ear_and_VIIIth_cranial_nerve_disorders	Ear_and_labyrinth_disorders
Tinnitus	P35499	68424	Tinnitus	Inner_ear_signs_and_symptoms	Inner_ear_and_VIIIth_cranial_nerve_disorders	Ear_and_labyrinth_disorders
Tinnitus	P45877	63606	Tinnitus	Inner_ear_signs_and_symptoms	Inner_ear_and_VIIIth_cranial_nerve_disorders	Ear_and_labyrinth_disorders
Tinnitus	P35367	66564	Tinnitus	Inner_ear_signs_and_symptoms	Inner_ear_and_VIIIth_cranial_nerve_disorders	Ear_and_labyrinth_disorders
Tinnitus	P26885	58940	Tinnitus	Inner_ear_signs_and_symptoms	Inner_ear_and_VIIIth_cranial_nerve_disorders	Ear_and_labyrinth_disorders
Tinnitus	P35498	66662	Tinnitus	Inner_ear_signs_and_symptoms	Inner_ear_and_VIIIth_cranial_nerve_disorders	Ear_and_labyrinth_disorders
Tinnitus	Q00688	62729	Tinnitus	Inner_ear_signs_and_symptoms	Inner_ear_and_VIIIth_cranial_nerve_disorders	Ear_and_labyrinth_disorders
Tinnitus	Q12809	61990	Tinnitus	Inner_ear_signs_and_symptoms	Inner_ear_and_VIIIth_cranial_nerve_disorders	Ear_and_labyrinth_disorders
Tinnitus	P11388	31795	Tinnitus	Inner_ear_signs_and_symptoms	Inner_ear_and_VIIIth_cranial_nerve_disorders	Ear_and_labyrinth_disorders
Tinnitus	Q07699	67308	Tinnitus	Inner_ear_signs_and_symptoms	Inner_ear_and_VIIIth_cranial_nerve_disorders	Ear_and_labyrinth_disorders
Tinnitus	Q9Y680	21130	Tinnitus	Inner_ear_signs_and_symptoms	Inner_ear_and_VIIIth_cranial_nerve_disorders	Ear_and_labyrinth_disorders
Tinnitus	P68106	50788	Tinnitus	Inner_ear_signs_and_symptoms	Inner_ear_and_VIIIth_cranial_nerve_disorders	Ear_and_labyrinth_disorders
Tinnitus	Q01118	14782	Tinnitus	Inner_ear_signs_and_symptoms	Inner_ear_and_VIIIth_cranial_nerve_disorders	Ear_and_labyrinth_disorders
Tinnitus	P30405	51465	Tinnitus	Inner_ear_signs_and_symptoms	Inner_ear_and_VIIIth_cranial_nerve_disorders	Ear_and_labyrinth_disorders
Tinnitus	Q13427	6260	Tinnitus	Inner_ear_signs_and_symptoms	Inner_ear_and_VIIIth_cranial_nerve_disorders	Ear_and_labyrinth_disorders
Tinnitus	P09619	13540	Tinnitus	Inner_ear_signs_and_symptoms	Inner_ear_and_VIIIth_cranial_nerve_disorders	Ear_and_labyrinth_disorders
Tinnitus	Q13526	19566	Tinnitus	Inner_ear_signs_and_symptoms	Inner_ear_and_VIIIth_cranial_nerve_disorders	Ear_and_labyrinth_disorders
Tinnitus	Q9NY46	64563	Tinnitus	Inner_ear_signs_and_symptoms	Inner_ear_and_VIIIth_cranial_nerve_disorders	Ear_and_labyrinth_disorders
Tinnitus	P12821	4912	Tinnitus	Inner_ear_signs_and_symptoms	Inner_ear_and_VIIIth_cranial_nerve_disorders	Ear_and_labyrinth_disorders
Torsade_de_pointes	Q12809	61990	Torsade_de_pointes	Ventricular_arrhythmias_and_cardiac_arrest	Cardiac_arrhythmias	Cardiac_disorders
Torticollis	P21918	59957	Torticollis	Muscle_tone_abnormalities	Muscle_disorders	Musculoskeletal_and_connective_tissue_disorders
Torticollis	Q15413	51944	Torticollis	Muscle_tone_abnormalities	Muscle_disorders	Musculoskeletal_and_connective_tissue_disorders
Torticollis	P21917	59953	Torticollis	Muscle_tone_abnormalities	Muscle_disorders	Musculoskeletal_and_connective_tissue_disorders
Torticollis	P14416	59942	Torticollis	Muscle_tone_abnormalities	Muscle_disorders	Musculoskeletal_and_connective_tissue_disorders
Torticollis	P21675	18984	Torticollis	Muscle_tone_abnormalities	Muscle_disorders	Musculoskeletal_and_connective_tissue_disorders
Torticollis	P35462	59949	Torticollis	Muscle_tone_abnormalities	Muscle_disorders	Musculoskeletal_and_connective_tissue_disorders
Torticollis	Q9BZL6	64649	Torticollis	Muscle_tone_abnormalities	Muscle_disorders	Musculoskeletal_and_connective_tissue_disorders
Torticollis	P21728	59934	Torticollis	Muscle_tone_abnormalities	Muscle_disorders	Musculoskeletal_and_connective_tissue_disorders
Torticollis	Q86TJ2	26099	Torticollis	Muscle_tone_abnormalities	Muscle_disorders	Musculoskeletal_and_connective_tissue_disorders
Torticollis	P21817	19832	Torticollis	Muscle_tone_abnormalities	Muscle_disorders	Musculoskeletal_and_connective_tissue_disorders
Torticollis	P62701	12851	Torticollis	Muscle_tone_abnormalities	Muscle_disorders	Musculoskeletal_and_connective_tissue_disorders
Torticollis	Q9H1D0	63056	Torticollis	Muscle_tone_abnormalities	Muscle_disorders	Musculoskeletal_and_connective_tissue_disorders
Torticollis	Q14643	26005	Torticollis	Muscle_tone_abnormalities	Muscle_disorders	Musculoskeletal_and_connective_tissue_disorders
Torticollis	P98161	67045	Torticollis	Muscle_tone_abnormalities	Muscle_disorders	Musculoskeletal_and_connective_tissue_disorders
Torticollis	O75762	4865	Torticollis	Muscle_tone_abnormalities	Muscle_disorders	Musculoskeletal_and_connective_tissue_disorders
Torticollis	Q13563	16075	Torticollis	Muscle_tone_abnormalities	Muscle_disorders	Musculoskeletal_and_connective_tissue_disorders
Torticollis	Q14573	5758	Torticollis	Muscle_tone_abnormalities	Muscle_disorders	Musculoskeletal_and_connective_tissue_disorders
Torticollis	Q92736	6953	Torticollis	Muscle_tone_abnormalities	Muscle_disorders	Musculoskeletal_and_connective_tissue_disorders
Torticollis	Q15139	13918	Torticollis	Muscle_tone_abnormalities	Muscle_disorders	Musculoskeletal_and_connective_tissue_disorders
Torticollis	P35367	66564	Torticollis	Muscle_tone_abnormalities	Muscle_disorders	Musculoskeletal_and_connective_tissue_disorders
Tremor	P21918	59957	Tremor	Tremor_(excl_congenital)	Movement_disorders_(incl_parkinsonism)	Nervous_system_disorders
Tremor	P24534	7571	Tremor	Tremor_(excl_congenital)	Movement_disorders_(incl_parkinsonism)	Nervous_system_disorders
Tremor	Q8IWT1	65347	Tremor	Tremor_(excl_congenital)	Movement_disorders_(incl_parkinsonism)	Nervous_system_disorders
Tremor	Q9NY72	65583	Tremor	Tremor_(excl_congenital)	Movement_disorders_(incl_parkinsonism)	Nervous_system_disorders
Tremor	Q15413	51944	Tremor	Tremor_(excl_congenital)	Movement_disorders_(incl_parkinsonism)	Nervous_system_disorders
Tremor	P21917	59953	Tremor	Tremor_(excl_congenital)	Movement_disorders_(incl_parkinsonism)	Nervous_system_disorders
Tremor	P13945	8611	Tremor	Tremor_(excl_congenital)	Movement_disorders_(incl_parkinsonism)	Nervous_system_disorders
Tremor	Q9Y237	18933	Tremor	Tremor_(excl_congenital)	Movement_disorders_(incl_parkinsonism)	Nervous_system_disorders
Tremor	P14416	59942	Tremor	Tremor_(excl_congenital)	Movement_disorders_(incl_parkinsonism)	Nervous_system_disorders
Tremor	Q9Y3C6	22648	Tremor	Tremor_(excl_congenital)	Movement_disorders_(incl_parkinsonism)	Nervous_system_disorders
Tremor	P62937	17592	Tremor	Tremor_(excl_congenital)	Movement_disorders_(incl_parkinsonism)	Nervous_system_disorders
Tremor	Q02790	42486	Tremor	Tremor_(excl_congenital)	Movement_disorders_(incl_parkinsonism)	Nervous_system_disorders
Tremor	P21675	18984	Tremor	Tremor_(excl_congenital)	Movement_disorders_(incl_parkinsonism)	Nervous_system_disorders
Tremor	Q9H2H8	28005	Tremor	Tremor_(excl_congenital)	Movement_disorders_(incl_parkinsonism)	Nervous_system_disorders
Tremor	Q9UNP9	13991	Tremor	Tremor_(excl_congenital)	Movement_disorders_(incl_parkinsonism)	Nervous_system_disorders
Tremor	P35462	59949	Tremor	Tremor_(excl_congenital)	Movement_disorders_(incl_parkinsonism)	Nervous_system_disorders
Tremor	Q9BZL6	64649	Tremor	Tremor_(excl_congenital)	Movement_disorders_(incl_parkinsonism)	Nervous_system_disorders
Tremor	P07550	8602	Tremor	Tremor_(excl_congenital)	Movement_disorders_(incl_parkinsonism)	Nervous_system_disorders
Tremor	P08588	8592	Tremor	Tremor_(excl_congenital)	Movement_disorders_(incl_parkinsonism)	Nervous_system_disorders
Tremor	P20648	20971	Tremor	Tremor_(excl_congenital)	Movement_disorders_(incl_parkinsonism)	Nervous_system_disorders
Tremor	P21728	59934	Tremor	Tremor_(excl_congenital)	Movement_disorders_(incl_parkinsonism)	Nervous_system_disorders
Tremor	Q86TJ2	26099	Tremor	Tremor_(excl_congenital)	Movement_disorders_(incl_parkinsonism)	Nervous_system_disorders
Tremor	P21817	19832	Tremor	Tremor_(excl_congenital)	Movement_disorders_(incl_parkinsonism)	Nervous_system_disorders
Tremor	O95302	16153	Tremor	Tremor_(excl_congenital)	Movement_disorders_(incl_parkinsonism)	Nervous_system_disorders
Tremor	Q14524	18291	Tremor	Tremor_(excl_congenital)	Movement_disorders_(incl_parkinsonism)	Nervous_system_disorders
Tremor	P62701	12851	Tremor	Tremor_(excl_congenital)	Movement_disorders_(incl_parkinsonism)	Nervous_system_disorders
Tremor	O75344	45290	Tremor	Tremor_(excl_congenital)	Movement_disorders_(incl_parkinsonism)	Nervous_system_disorders
Tremor	Q9H1D0	63056	Tremor	Tremor_(excl_congenital)	Movement_disorders_(incl_parkinsonism)	Nervous_system_disorders
Tremor	Q14643	26005	Tremor	Tremor_(excl_congenital)	Movement_disorders_(incl_parkinsonism)	Nervous_system_disorders
Tremor	Q14318	15929	Tremor	Tremor_(excl_congenital)	Movement_disorders_(incl_parkinsonism)	Nervous_system_disorders
Tremor	Q08752	35603	Tremor	Tremor_(excl_congenital)	Movement_disorders_(incl_parkinsonism)	Nervous_system_disorders
Tremor	P98161	67045	Tremor	Tremor_(excl_congenital)	Movement_disorders_(incl_parkinsonism)	Nervous_system_disorders
Tremor	O75762	4865	Tremor	Tremor_(excl_congenital)	Movement_disorders_(incl_parkinsonism)	Nervous_system_disorders
Tremor	Q13563	16075	Tremor	Tremor_(excl_congenital)	Movement_disorders_(incl_parkinsonism)	Nervous_system_disorders
Tremor	P23284	6791	Tremor	Tremor_(excl_congenital)	Movement_disorders_(incl_parkinsonism)	Nervous_system_disorders
Tremor	Q13356	32240	Tremor	Tremor_(excl_congenital)	Movement_disorders_(incl_parkinsonism)	Nervous_system_disorders
Tremor	Q14573	5758	Tremor	Tremor_(excl_congenital)	Movement_disorders_(incl_parkinsonism)	Nervous_system_disorders
Tremor	Q92736	6953	Tremor	Tremor_(excl_congenital)	Movement_disorders_(incl_parkinsonism)	Nervous_system_disorders
Tremor	Q15139	13918	Tremor	Tremor_(excl_congenital)	Movement_disorders_(incl_parkinsonism)	Nervous_system_disorders
Tremor	Q13451	17580	Tremor	Tremor_(excl_congenital)	Movement_disorders_(incl_parkinsonism)	Nervous_system_disorders
Tremor	P35499	68424	Tremor	Tremor_(excl_congenital)	Movement_disorders_(incl_parkinsonism)	Nervous_system_disorders
Tremor	P45877	63606	Tremor	Tremor_(excl_congenital)	Movement_disorders_(incl_parkinsonism)	Nervous_system_disorders
Tremor	P35367	66564	Tremor	Tremor_(excl_congenital)	Movement_disorders_(incl_parkinsonism)	Nervous_system_disorders
Tremor	P26885	58940	Tremor	Tremor_(excl_congenital)	Movement_disorders_(incl_parkinsonism)	Nervous_system_disorders
Tremor	P35498	66662	Tremor	Tremor_(excl_congenital)	Movement_disorders_(incl_parkinsonism)	Nervous_system_disorders
Tremor	Q00688	62729	Tremor	Tremor_(excl_congenital)	Movement_disorders_(incl_parkinsonism)	Nervous_system_disorders
Tremor	P28223	1179	Tremor	Tremor_(excl_congenital)	Movement_disorders_(incl_parkinsonism)	Nervous_system_disorders
Tremor	P11388	31795	Tremor	Tremor_(excl_congenital)	Movement_disorders_(incl_parkinsonism)	Nervous_system_disorders
Tremor	Q07699	67308	Tremor	Tremor_(excl_congenital)	Movement_disorders_(incl_parkinsonism)	Nervous_system_disorders
Tremor	P08912	5198	Tremor	Tremor_(excl_congenital)	Movement_disorders_(incl_parkinsonism)	Nervous_system_disorders
Tremor	Q9Y680	21130	Tremor	Tremor_(excl_congenital)	Movement_disorders_(incl_parkinsonism)	Nervous_system_disorders
Tremor	P68106	50788	Tremor	Tremor_(excl_congenital)	Movement_disorders_(incl_parkinsonism)	Nervous_system_disorders
Tremor	Q01118	14782	Tremor	Tremor_(excl_congenital)	Movement_disorders_(incl_parkinsonism)	Nervous_system_disorders
Tremor	P30405	51465	Tremor	Tremor_(excl_congenital)	Movement_disorders_(incl_parkinsonism)	Nervous_system_disorders
Tremor	Q13427	6260	Tremor	Tremor_(excl_congenital)	Movement_disorders_(incl_parkinsonism)	Nervous_system_disorders
Tremor	Q13526	19566	Tremor	Tremor_(excl_congenital)	Movement_disorders_(incl_parkinsonism)	Nervous_system_disorders
Tremor	Q9NY46	64563	Tremor	Tremor_(excl_congenital)	Movement_disorders_(incl_parkinsonism)	Nervous_system_disorders
Tremor	P12821	4912	Tremor	Tremor_(excl_congenital)	Movement_disorders_(incl_parkinsonism)	Nervous_system_disorders
Tubulointerstitial_nephritis	O43570	33119	Tubulointerstitial_nephritis	Nephritis_NEC	Nephropathies	Renal_and_urinary_disorders
Tubulointerstitial_nephritis	Q8WTZ4		Tubulointerstitial_nephritis	Nephritis_NEC	Nephropathies	Renal_and_urinary_disorders
Tubulointerstitial_nephritis	Q16790	33243	Tubulointerstitial_nephritis	Nephritis_NEC	Nephropathies	Renal_and_urinary_disorders
Tubulointerstitial_nephritis	P22748	33200	Tubulointerstitial_nephritis	Nephritis_NEC	Nephropathies	Renal_and_urinary_disorders
Tubulointerstitial_nephritis	Q9Y2D0	33213	Tubulointerstitial_nephritis	Nephritis_NEC	Nephropathies	Renal_and_urinary_disorders
Tubulointerstitial_nephritis	P35218	33208	Tubulointerstitial_nephritis	Nephritis_NEC	Nephropathies	Renal_and_urinary_disorders
Tumour_lysis_syndrome	P42684	3600	Tumour_lysis_syndrome	Electrolyte_imbalance_NEC	Electrolyte_and_fluid_balance_conditions	Metabolism_and_nutrition_disorders
Tumour_lysis_syndrome	P09619	13540	Tumour_lysis_syndrome	Electrolyte_imbalance_NEC	Electrolyte_and_fluid_balance_conditions	Metabolism_and_nutrition_disorders
Tumour_lysis_syndrome	P16234	30708	Tumour_lysis_syndrome	Electrolyte_imbalance_NEC	Electrolyte_and_fluid_balance_conditions	Metabolism_and_nutrition_disorders
Tumour_lysis_syndrome	P07948	13896	Tumour_lysis_syndrome	Electrolyte_imbalance_NEC	Electrolyte_and_fluid_balance_conditions	Metabolism_and_nutrition_disorders
Ulcerative_keratitis	P04150	29101	Ulcerative_keratitis	Corneal_infections,_oedemas_and_inflammations	Ocular_infections,_irritations_and_inflammations	Eye_disorders
Vaginal_discharge	P08842	66077	Vaginal_discharge	Vulvovaginal_signs_and_symptoms	Vulvovaginal_disorders_(excl_infections_and_inflammations)	Reproductive_system_and_breast_disorders
Vaginal_discharge	Q92731	50933	Vaginal_discharge	Vulvovaginal_signs_and_symptoms	Vulvovaginal_disorders_(excl_infections_and_inflammations)	Reproductive_system_and_breast_disorders
Vaginal_discharge	P03372	14636	Vaginal_discharge	Vulvovaginal_signs_and_symptoms	Vulvovaginal_disorders_(excl_infections_and_inflammations)	Reproductive_system_and_breast_disorders
Vaginal_discharge	P14061	57409	Vaginal_discharge	Vulvovaginal_signs_and_symptoms	Vulvovaginal_disorders_(excl_infections_and_inflammations)	Reproductive_system_and_breast_disorders
Vascular_purpura	P35218	33208	Vascular_purpura	Purpura_and_related_conditions	Skin_vascular_abnormalities	Skin_and_subcutaneous_tissue_disorders
Vascular_purpura	Q9Y2D0	33213	Vascular_purpura	Purpura_and_related_conditions	Skin_vascular_abnormalities	Skin_and_subcutaneous_tissue_disorders
Vascular_purpura	Q8WTZ4		Vascular_purpura	Purpura_and_related_conditions	Skin_vascular_abnormalities	Skin_and_subcutaneous_tissue_disorders
Ventricular_tachycardia	Q92736	6953	Ventricular_tachycardia	Ventricular_arrhythmias_and_cardiac_arrest	Cardiac_arrhythmias	Cardiac_disorders
Ventricular_tachycardia	Q12809	61990	Ventricular_tachycardia	Ventricular_arrhythmias_and_cardiac_arrest	Cardiac_arrhythmias	Cardiac_disorders
Ventricular_tachycardia	P51787	60361	Ventricular_tachycardia	Ventricular_arrhythmias_and_cardiac_arrest	Cardiac_arrhythmias	Cardiac_disorders
Ventricular_tachycardia	Q14524	18291	Ventricular_tachycardia	Ventricular_arrhythmias_and_cardiac_arrest	Cardiac_arrhythmias	Cardiac_disorders
Virilism	P11511	48126	Virilism	Female_gonadal_function_disorders	Endocrine_disorders_of_gonadal_function	Endocrine_disorders
